# Supplementary material for: The Effects of Cucumber Mosaic Virus and Its 2a and 2b Proteins on Interactions of Tomato Plants with the Aphid Vectors Myzus persicae and Macrosiphum euphorbiae
Source: MDPI journal article supplement (doi:10.3390/v14081703), 2022-08-01
Supplement: s1 [file s1]

Supplementary Figures

The effects of cucumber mosaic virus and its 2a and 2b proteins on interactions of tomato plants with the aphid vectors *Myzus persicae* and *Macrosiphum euphorbiae*

Warren Arinaitwe <sup>1,2</sup>, Alex Guyon <sup>1,3</sup>, Trisna D. Tungadi <sup>1,4</sup>, Nik J. Cunniffe <sup>1</sup>, Sun-Ju Rhee <sup>1</sup>, Amjad Khalaf <sup>1,5</sup>, Netsai M. Mhlanga <sup>1,6</sup>, Adrienne E. Pate <sup>1</sup>, Alex M. Murphy <sup>1</sup>, and John P. Carr <sup>1\*</sup>

<sup>1</sup> Department of Plant Sciences, University of Cambridge, Downing Street, Cambridge CB2 3EA, United Kingdom; njc1001@cam.ac.uk, sjrhee825@gmail.com, ap411@cam.ac.uk, amm1013@cam.ac.uk , jpc1005@cam.ac.uk

<sup>2</sup> Current Address; Alliance for Biodiversity-International Centre for Tropical Agriculture (CIAT), Dong Dok, Ban Nongviengkham, Vientiane, Lao Peoples Democratic Republic; W.Arinaitwe@cgiar.org

<sup>3</sup> Current address; Sainsbury Laboratory Cambridge University, Bateman St, Cambridge CB2 1LR, United Kingdom; alex.guyon@slcu.cam.ac.uk

<sup>4</sup> Current address; School of Life Sciences, Keele University, Newcastle ST5 5BG, United Kingdom; trisnat@gmail.com

<sup>5</sup> Current address; Wellcome Sanger Institute, Wellcome Trust Genome Campus, Hinxton, Saffron Walden CB10 1RQ, United Kingdom; ak37@sanger.ac.uk

<sup>6</sup> Current address; National Institute for Agricultural Botany-East Malling (NIAB-EMR), West Malling ME19 6BJ, United Kingdom; Netsai.Mhlanga@niab.com

\* Correspondence: jpc1005@cam.ac.uk

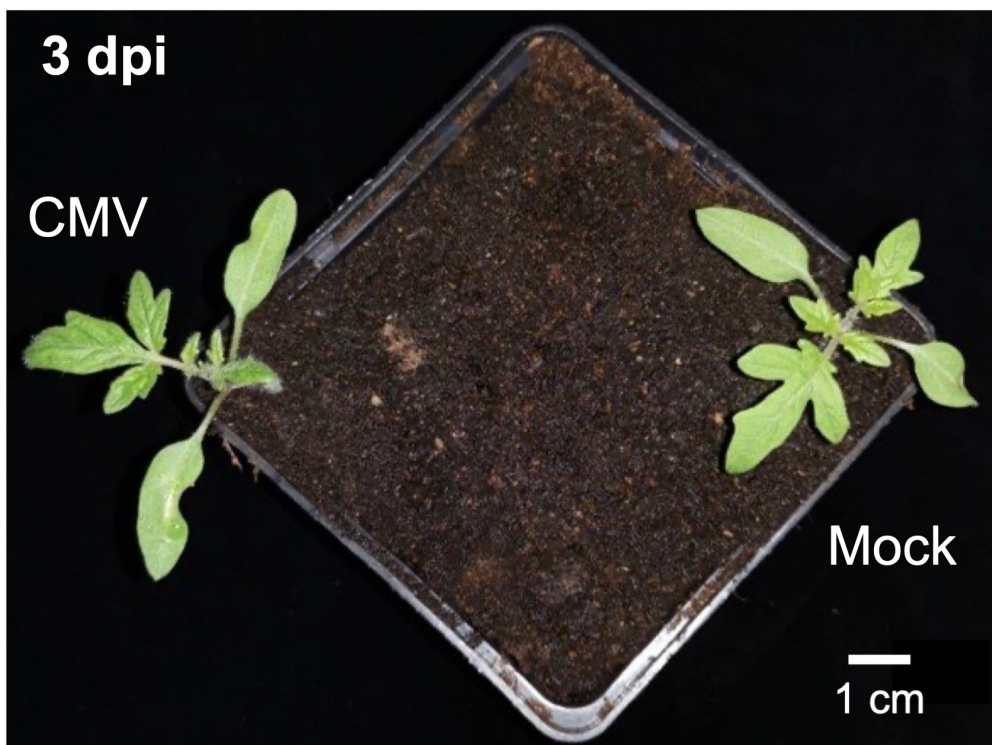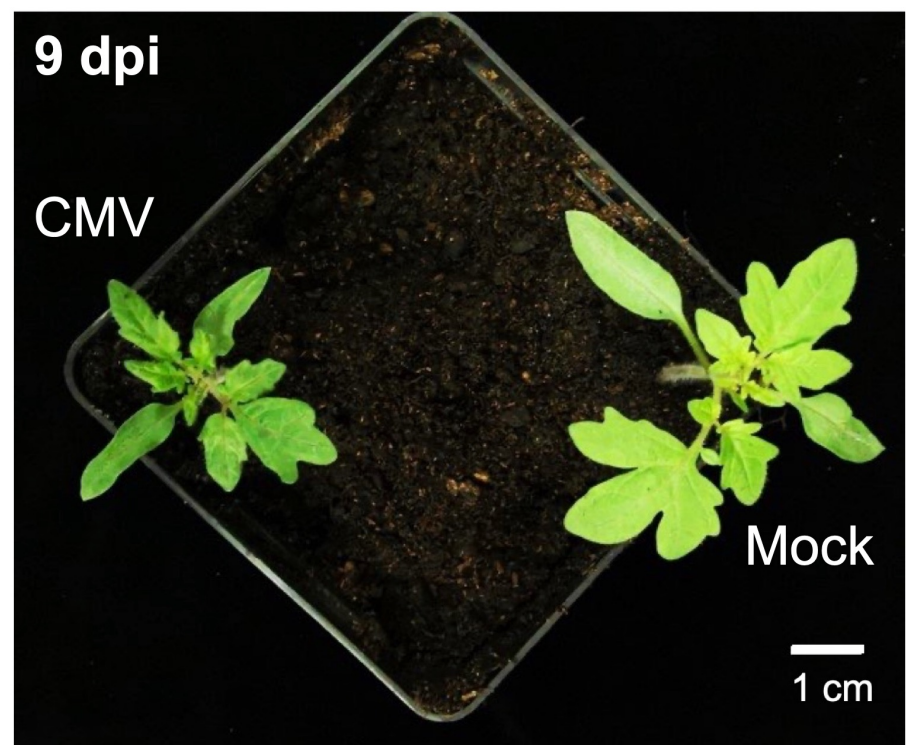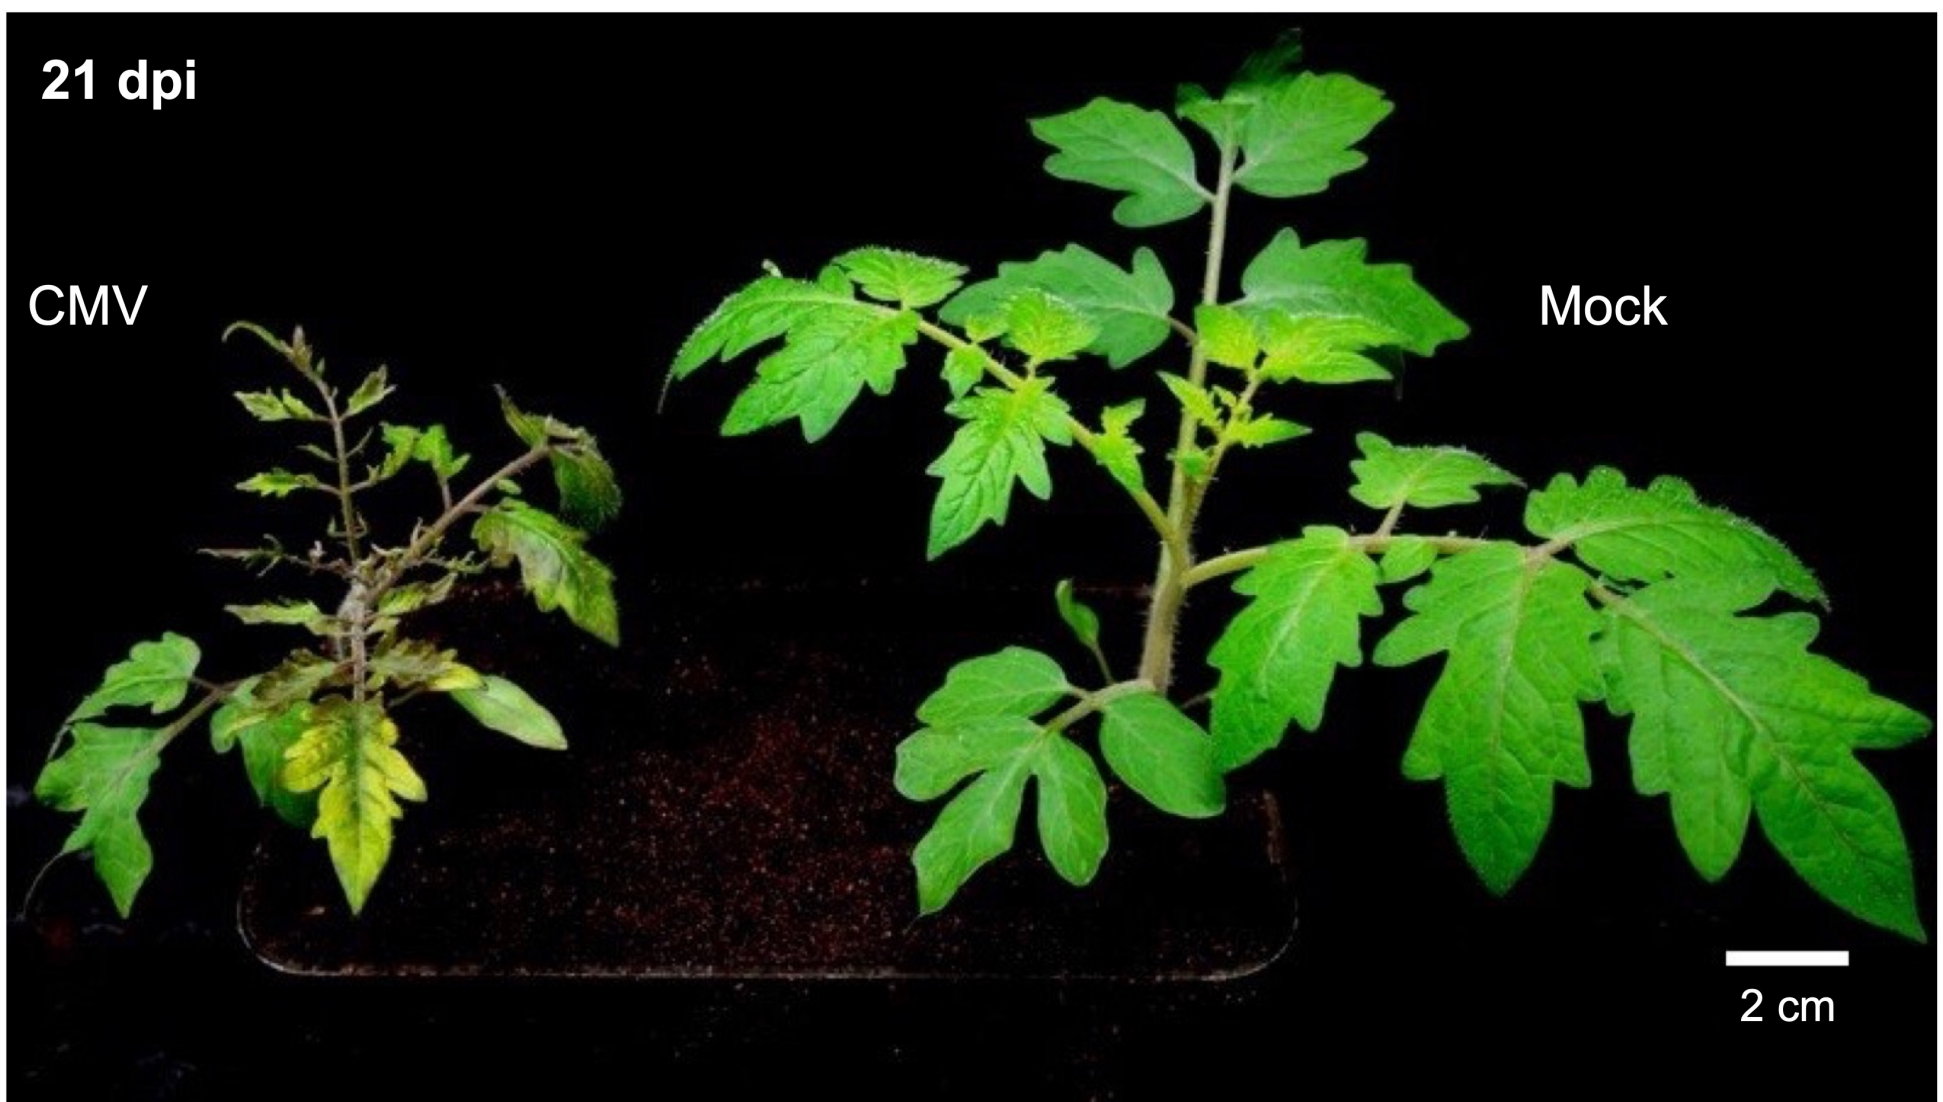

**Figure S1.** The typical appearance of tomato plants following mock-inoculation (Mock) or inoculation with the Fny strain of cucumber mosaic virus (CMV) strain Fny on cotyledons. Plants were inoculated or mock-inoculated on the cotyledons and photographed at 3, 9 or 21 days post-inoculation (dpi). Systemic infection with CMV was confirmed by ELISA using tissues from non-inoculated true leaves.

## *Myzus persicae*

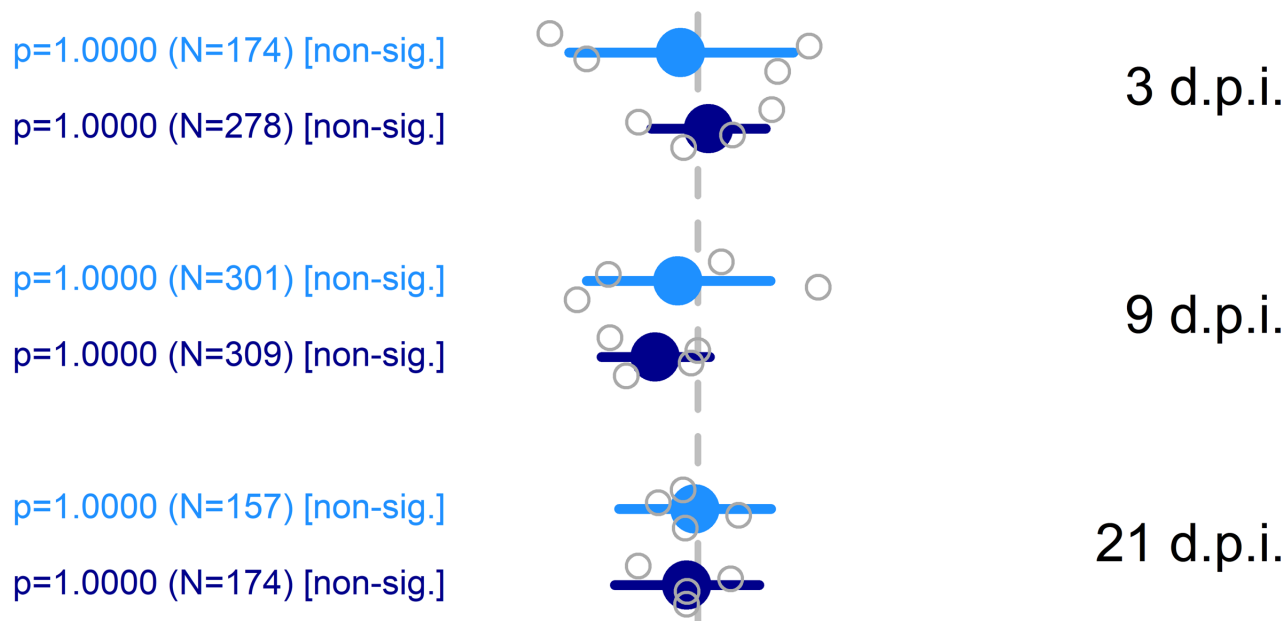

## *Macrosiphum euphorbiae*

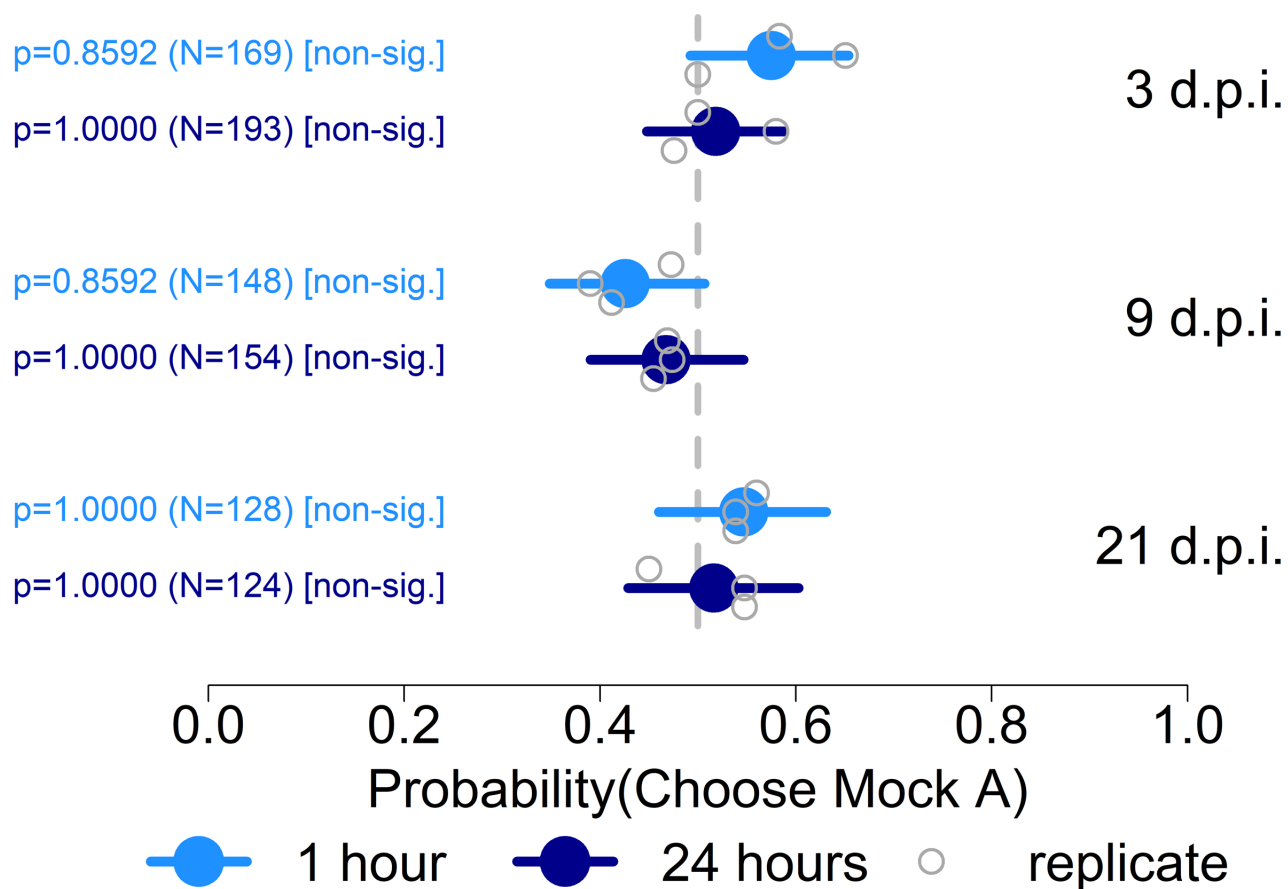

**Figure S2** Mock-inoculated tomato plant data for Figure 1 carried out to control for any additional stimuli or biases in the experimental set-up. In these experiments aphids were presented with two mock-inoculated plants (designated plant A and plant B). The x-axis shows the range of the 95% credible interval of the probability of settlement of aphids (*Myzus persicae* or *Macrosiphum euphorbiae*) on infected plants at 1 and 24 h after aphid release, with values for each independent experiment (replicate). The total number of aphids (N) investigated for each comparison is indicated and statistical significance or non-significance determined using binomial tests. Experiments were done at 3, 9, and 21 days following mock inoculation (in parallel with genuinely infected plants: data in Figure 1). The vertical grey dotted lines indicate a probability of 0.5 of settlement on infected versus mock-inoculated plants, i.e., no settlement preference.



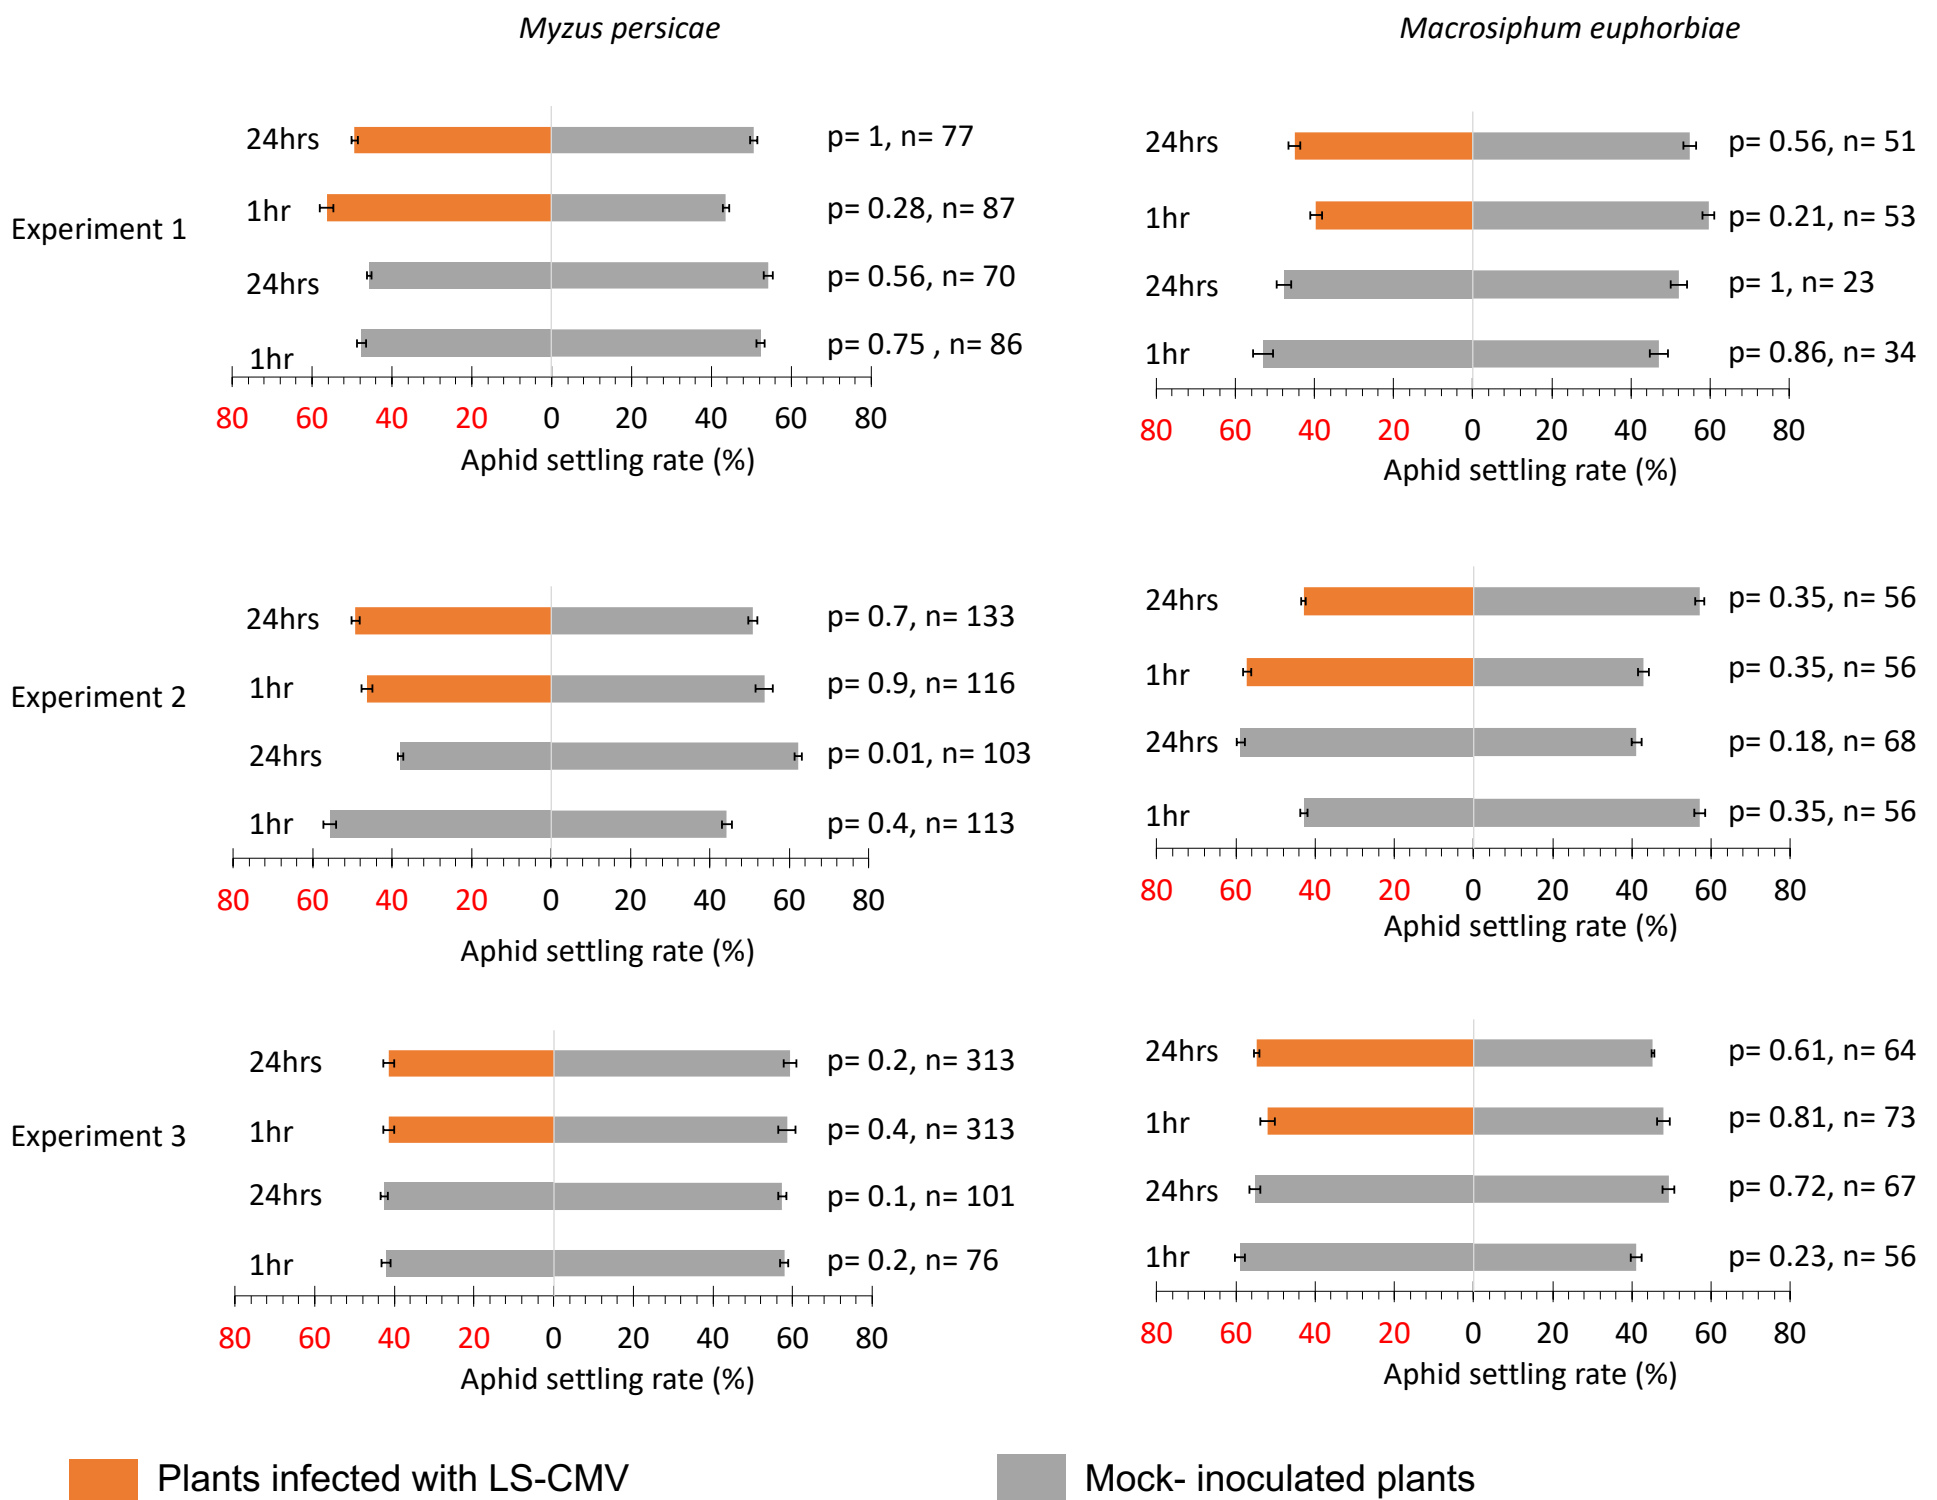

**Figure S3** Free-choice settling assays indicated that LS-CMV does not induce resistance to aphid settlement in tomato. In three independent experiments with *Myzus persicae* and *Macrosiphum euphorbiae*, aphids were allowed to settle on either mock-inoculated plants or plants infected with LS-CMV (at 21 days post-inoculation). Aphid settlement was counted at 1 and 24 h post-release. The error bars represent SEM and binomial tests indicated no statistical significance (at  $\alpha = 0.05$ ) in settlement, and n represents the total number of aphids settled per pairwise choice.

**(a) *Myzus persicae***

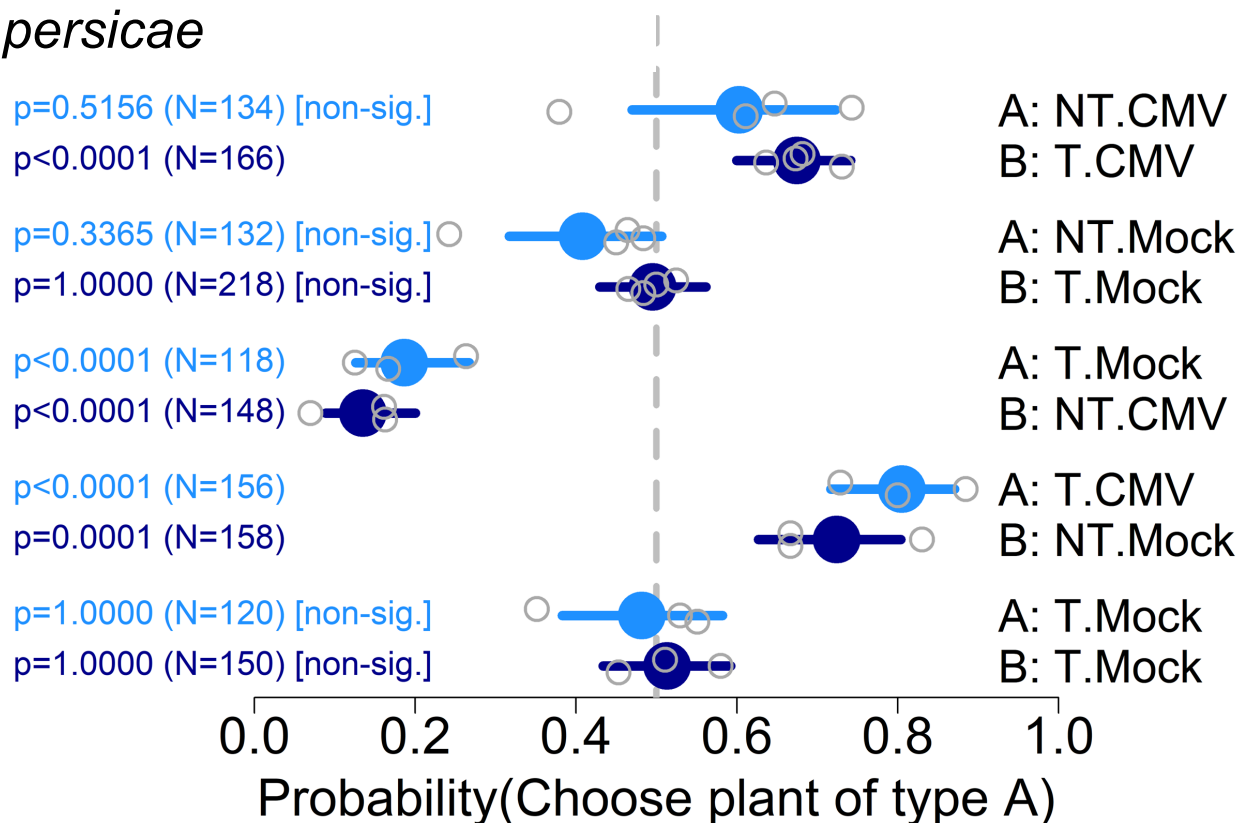

**(b) *Macrosiphum euphorbiae***

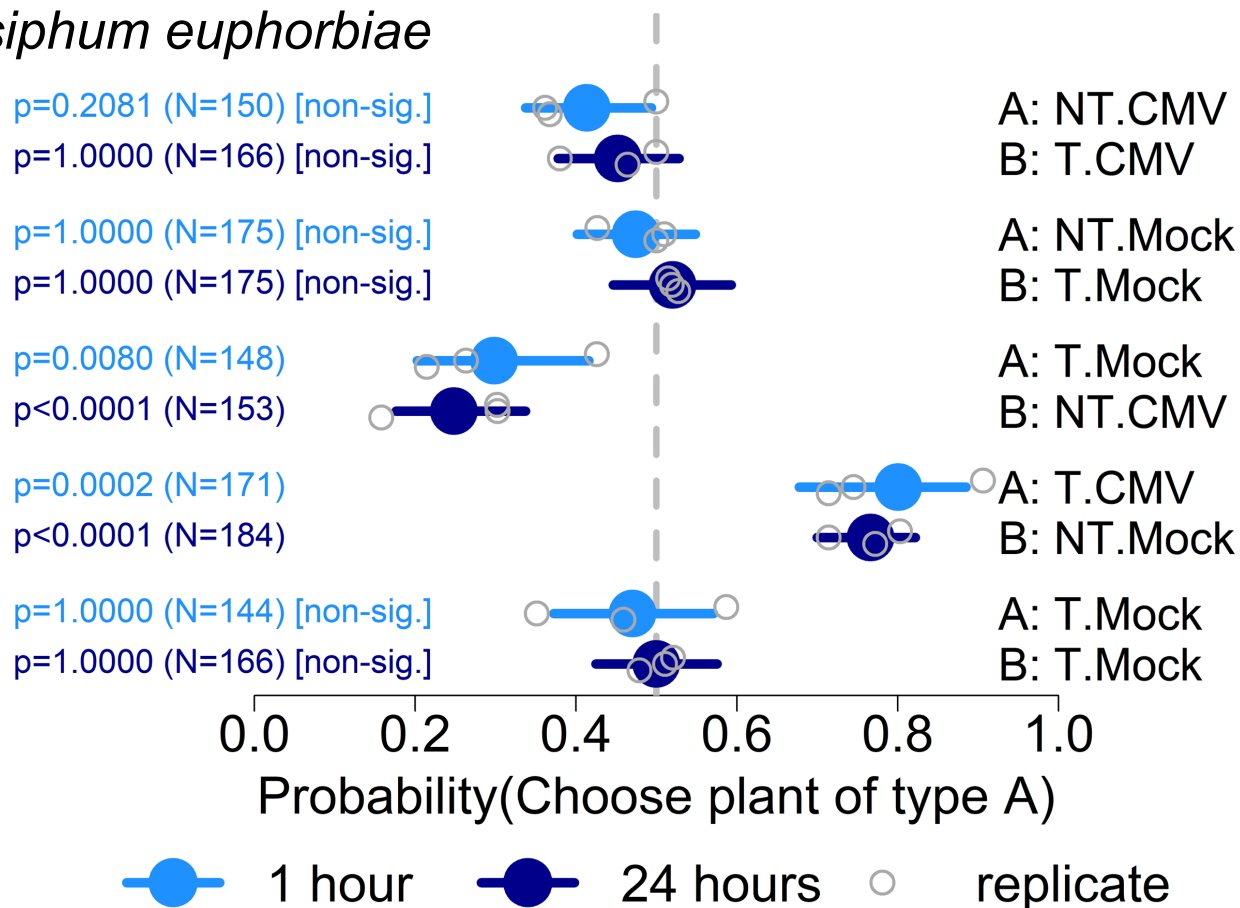

**Figure S4** Aphid free choice tests to determine if signalling dependent upon salicylic acid influences cucumber mosaic virus-induced changes in aphid-tomato interactions. Summaries of assays for settlement of **A. *Myzus persicae*** and **B. *Macrosiphum euphorbiae*** on either *NahG*-transgenic (T: unable to accumulate salicylic acid) and non-transgenic (NT) tomato plants that had been mock-inoculated (Mock) or inoculated with Fny-CMV (CMV) 7 days previously (plant A or plant B in various pairwise plant treatment combinations as indicated). Four independent experiments were performed using *Myzus persicae* (**A**) and three with *Macrosiphum euphorbiae* (**B**). The x-axis shows the range of the 95% credible interval of the probability of aphid settlement at 1 and 24 h after aphid release, with values for each independent experiment (replicate). The total number of aphids (N) investigated for each comparison is indicated and statistical significance or non-significance determined using binomial tests. The vertical grey dotted line indicates a probability of 0.5 of settlement on infected versus mock-inoculated plants, i.e., no preference.



## Mock-Inoculated

*NahG*

Non-transformed

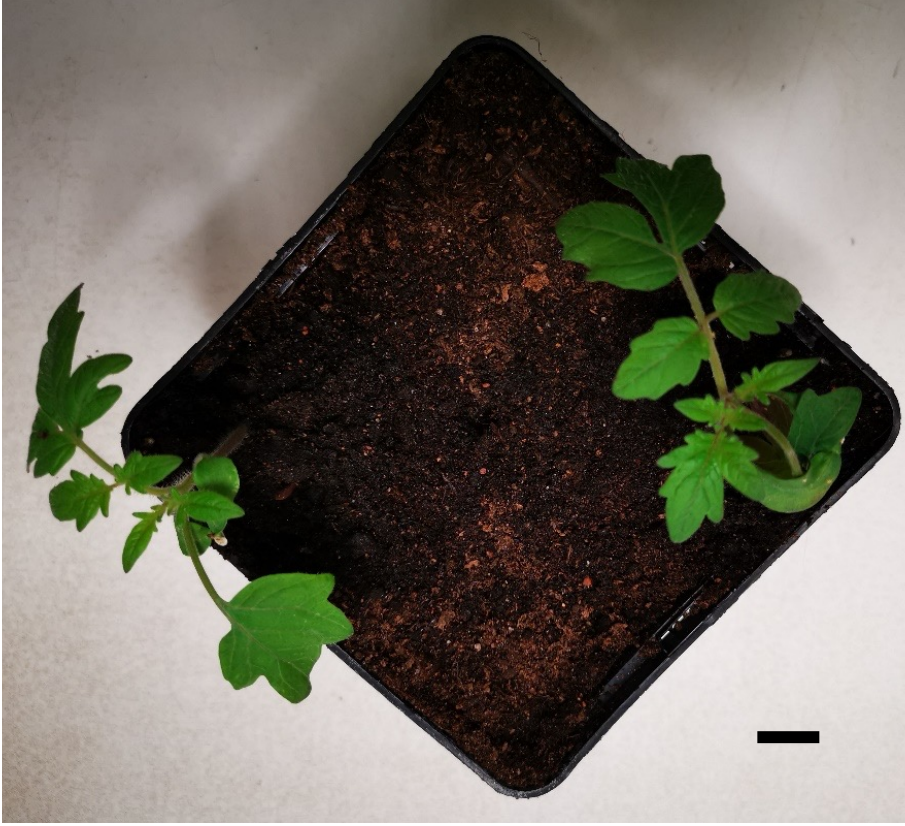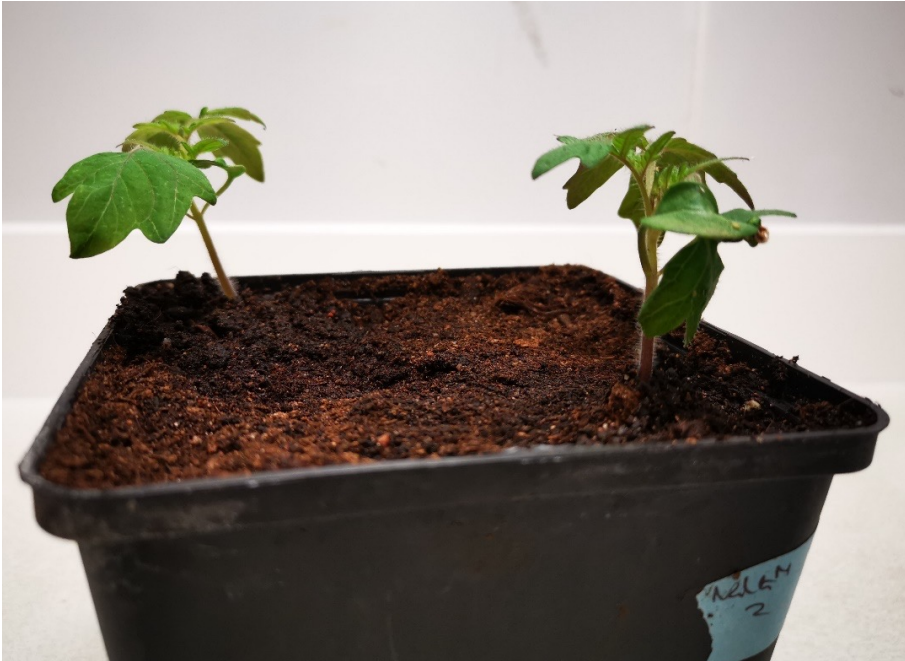

## CMV-infected

*NahG*

Non-transformed

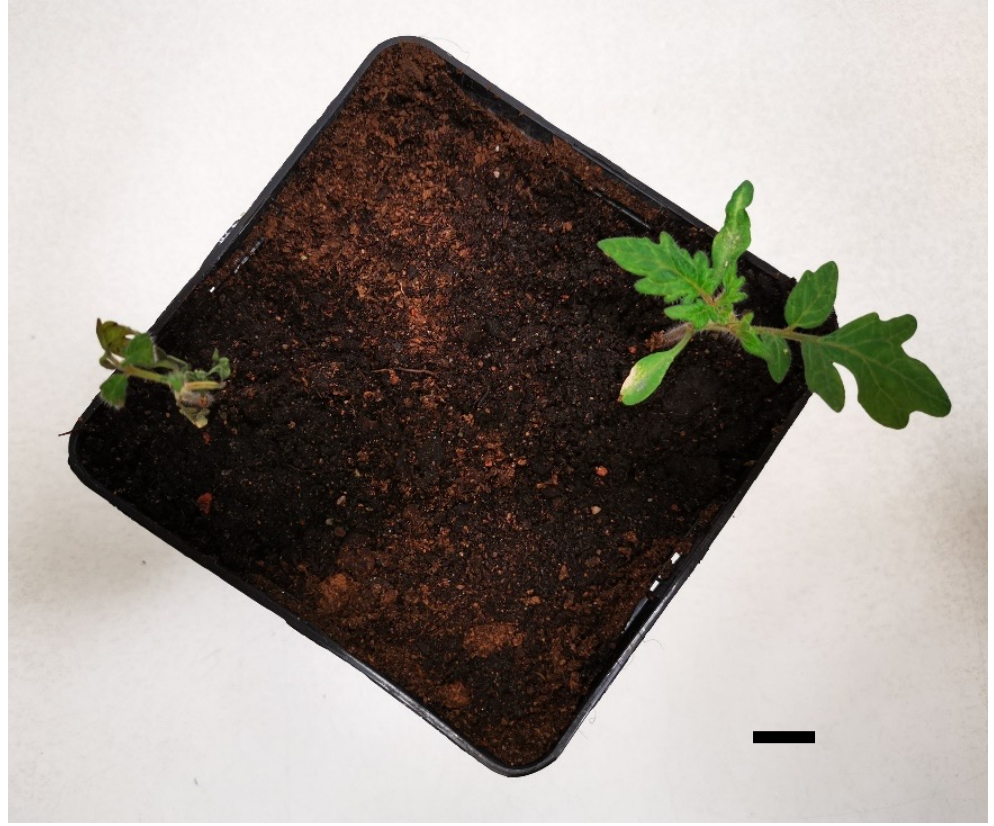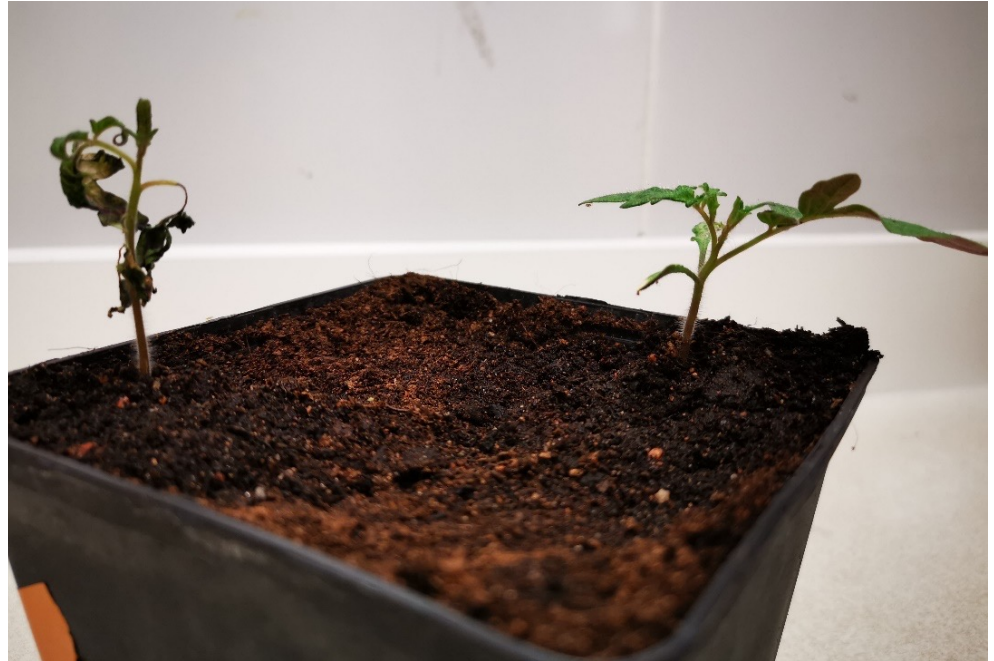

**Figure S5.** The typical appearances of non-transformed or *NahG*-transgenic tomato plants. Plants were photographed at 10 days following mock-inoculation or inoculation with cucumber mosaic virus (CMV) strain Fny. Scale bars in upper figures indicate 1 cm. The same plants were photographed for top-down and side view photographs.
