# Supplementary material for: The Effects of Cucumber Mosaic Virus and Its 2a and 2b Proteins on Interactions of Tomato Plants with the Aphid Vectors Myzus persicae and Macrosiphum euphorbiae
Source: Viruses. 2022 Aug 1;14(8):1703. doi: 10.3390/v14081703 (PMC9416248; doi:10.3390/v14081703)
Supplement: Supplementary file 1 [file viruses-14-01703-s001.zip › Supplementary Spreadsheet 1_ Arinaitwe et al., FV.xlsx]

## Sheet: Sheet1
Spreadsheet S1. Aphid data. Arinaitwe et al.

## Sheet: Figure 1 & Figure S2
vector	experiment	time	dpi	treatment.pair	A	B	A_B
Myzus persicae	1	1	3	1	4	4	Mock_CMV
Myzus persicae	1	1	3	2	4	10	Mock_CMV
Myzus persicae	1	1	3	3	0	11	Mock_CMV
Myzus persicae	1	1	3	4	3	8	Mock_CMV
Myzus persicae	1	1	3	5	1	9	Mock_CMV
Myzus persicae	1	1	3	6	7	7	Mock_CMV
Myzus persicae	1	1	3	7	2	9	Mock_CMV
Myzus persicae	2	1	3	1	5	9	Mock_CMV
Myzus persicae	2	1	3	2	4	12	Mock_CMV
Myzus persicae	2	1	3	3	0	6	Mock_CMV
Myzus persicae	2	1	3	4	0	15	Mock_CMV
Myzus persicae	2	1	3	5	9	2	Mock_CMV
Myzus persicae	2	1	3	6	2	8	Mock_CMV
Myzus persicae	2	1	3	7	6	5	Mock_CMV
Myzus persicae	3	1	3	1	2	3	Mock_CMV
Myzus persicae	3	1	3	2	1	6	Mock_CMV
Myzus persicae	3	1	3	3	4	10	Mock_CMV
Myzus persicae	3	1	3	4	3	9	Mock_CMV
Myzus persicae	3	1	3	5	0	5	Mock_CMV
Myzus persicae	4	1	3	1	1	6	Mock_CMV
Myzus persicae	4	1	3	2	2	5	Mock_CMV
Myzus persicae	4	1	3	3	2	7	Mock_CMV
Myzus persicae	4	1	3	4	2	9	Mock_CMV
Myzus persicae	4	1	3	5	0	19	Mock_CMV
Myzus persicae	1	24	3	1	9	9	Mock_CMV
Myzus persicae	1	24	3	2	6	9	Mock_CMV
Myzus persicae	1	24	3	3	2	14	Mock_CMV
Myzus persicae	1	24	3	4	3	7	Mock_CMV
Myzus persicae	1	24	3	5	3	7	Mock_CMV
Myzus persicae	1	24	3	6	11	3	Mock_CMV
Myzus persicae	1	24	3	7	6	7	Mock_CMV
Myzus persicae	2	24	3	1	6	14	Mock_CMV
Myzus persicae	2	24	3	2	5	11	Mock_CMV
Myzus persicae	2	24	3	3	8	4	Mock_CMV
Myzus persicae	2	24	3	4	3	4	Mock_CMV
Myzus persicae	2	24	3	5	8	4	Mock_CMV
Myzus persicae	2	24	3	6	7	9	Mock_CMV
Myzus persicae	2	24	3	7	7	7	Mock_CMV
Myzus persicae	3	24	3	1	9	4	Mock_CMV
Myzus persicae	3	24	3	2	6	2	Mock_CMV
Myzus persicae	3	24	3	3	4	9	Mock_CMV
Myzus persicae	3	24	3	4	15	4	Mock_CMV
Myzus persicae	3	24	3	5	3	5	Mock_CMV
Myzus persicae	4	24	3	1	10	2	Mock_CMV
Myzus persicae	4	24	3	2	9	3	Mock_CMV
Myzus persicae	4	24	3	3	8	9	Mock_CMV
Myzus persicae	4	24	3	4	3	6	Mock_CMV
Myzus persicae	4	24	3	5	1	18	Mock_CMV
Myzus persicae	1	1	9	1	9	4	Mock_CMV
Myzus persicae	1	1	9	2	7	2	Mock_CMV
Myzus persicae	1	1	9	3	3	8	Mock_CMV
Myzus persicae	1	1	9	4	5	6	Mock_CMV
Myzus persicae	1	1	9	5	9	4	Mock_CMV
Myzus persicae	1	1	9	6	6	8	Mock_CMV
Myzus persicae	1	1	9	7	7	5	Mock_CMV
Myzus persicae	1	1	9	8	0	8	Mock_CMV
Myzus persicae	2	1	9	1	9	1	Mock_CMV
Myzus persicae	2	1	9	2	6	1	Mock_CMV
Myzus persicae	2	1	9	3	5	7	Mock_CMV
Myzus persicae	2	1	9	4	13	0	Mock_CMV
Myzus persicae	2	1	9	5	15	2	Mock_CMV
Myzus persicae	2	1	9	6	1	9	Mock_CMV
Myzus persicae	2	1	9	7	7	4	Mock_CMV
Myzus persicae	2	1	9	8	0	9	Mock_CMV
Myzus persicae	3	1	9	1	7	2	Mock_CMV
Myzus persicae	3	1	9	2	9	1	Mock_CMV
Myzus persicae	3	1	9	3	2	3	Mock_CMV
Myzus persicae	3	1	9	4	1	6	Mock_CMV
Myzus persicae	3	1	9	5	7	5	Mock_CMV
Myzus persicae	4	1	9	1	9	4	Mock_CMV
Myzus persicae	4	1	9	2	7	2	Mock_CMV
Myzus persicae	4	1	9	3	3	8	Mock_CMV
Myzus persicae	4	1	9	4	5	6	Mock_CMV
Myzus persicae	4	1	9	5	9	4	Mock_CMV
Myzus persicae	1	24	9	1	10	3	Mock_CMV
Myzus persicae	1	24	9	2	6	3	Mock_CMV
Myzus persicae	1	24	9	3	10	3	Mock_CMV
Myzus persicae	1	24	9	4	2	3	Mock_CMV
Myzus persicae	1	24	9	5	10	2	Mock_CMV
Myzus persicae	1	24	9	6	10	5	Mock_CMV
Myzus persicae	1	24	9	7	10	2	Mock_CMV
Myzus persicae	1	24	9	8	4	4	Mock_CMV
Myzus persicae	2	24	9	1	9	2	Mock_CMV
Myzus persicae	2	24	9	2	7	4	Mock_CMV
Myzus persicae	2	24	9	3	11	0	Mock_CMV
Myzus persicae	2	24	9	4	7	3	Mock_CMV
Myzus persicae	2	24	9	5	14	2	Mock_CMV
Myzus persicae	2	24	9	6	7	2	Mock_CMV
Myzus persicae	2	24	9	7	14	1	Mock_CMV
Myzus persicae	2	24	9	8	3	6	Mock_CMV
Myzus persicae	3	24	9	1	17	0	Mock_CMV
Myzus persicae	3	24	9	2	13	0	Mock_CMV
Myzus persicae	3	24	9	3	5	8	Mock_CMV
Myzus persicae	3	24	9	4	7	2	Mock_CMV
Myzus persicae	3	24	9	5	9	3	Mock_CMV
Myzus persicae	4	24	9	1	10	3	Mock_CMV
Myzus persicae	4	24	9	2	6	3	Mock_CMV
Myzus persicae	4	24	9	3	10	3	Mock_CMV
Myzus persicae	4	24	9	4	2	3	Mock_CMV
Myzus persicae	4	24	9	5	10	2	Mock_CMV
Myzus persicae	1	1	21	1	5	4	Mock_CMV
Myzus persicae	1	1	21	2	13	3	Mock_CMV
Myzus persicae	1	1	21	3	10	4	Mock_CMV
Myzus persicae	1	1	21	4	19	0	Mock_CMV
Myzus persicae	1	1	21	5	7	3	Mock_CMV
Myzus persicae	1	1	21	6	7	4	Mock_CMV
Myzus persicae	1	1	21	7	10	0	Mock_CMV
Myzus persicae	2	1	21	1	0	10	Mock_CMV
Myzus persicae	2	1	21	2	9	0	Mock_CMV
Myzus persicae	2	1	21	3	14	2	Mock_CMV
Myzus persicae	2	1	21	4	11	0	Mock_CMV
Myzus persicae	2	1	21	5	8	4	Mock_CMV
Myzus persicae	2	1	21	6	11	3	Mock_CMV
Myzus persicae	2	1	21	7	4	8	Mock_CMV
Myzus persicae	3	1	21	1	12	3	Mock_CMV
Myzus persicae	3	1	21	2	9	4	Mock_CMV
Myzus persicae	3	1	21	3	9	1	Mock_CMV
Myzus persicae	3	1	21	4	10	0	Mock_CMV
Myzus persicae	3	1	21	5	8	4	Mock_CMV
Myzus persicae	4	1	21	1	9	3	Mock_CMV
Myzus persicae	4	1	21	3	8	4	Mock_CMV
Myzus persicae	4	1	21	4	8	1	Mock_CMV
Myzus persicae	4	1	21	5	9	1	Mock_CMV
Myzus persicae	1	24	21	1	6	3	Mock_CMV
Myzus persicae	1	24	21	2	15	1	Mock_CMV
Myzus persicae	1	24	21	3	7	2	Mock_CMV
Myzus persicae	1	24	21	4	12	2	Mock_CMV
Myzus persicae	1	24	21	5	8	4	Mock_CMV
Myzus persicae	1	24	21	6	11	3	Mock_CMV
Myzus persicae	1	24	21	7	9	1	Mock_CMV
Myzus persicae	2	24	21	1	8	4	Mock_CMV
Myzus persicae	2	24	21	2	8	2	Mock_CMV
Myzus persicae	2	24	21	3	6	0	Mock_CMV
Myzus persicae	2	24	21	4	9	1	Mock_CMV
Myzus persicae	2	24	21	5	4	4	Mock_CMV
Myzus persicae	2	24	21	6	8	4	Mock_CMV
Myzus persicae	2	24	21	5	5	8	Mock_CMV
Myzus persicae	3	24	21	1	12	2	Mock_CMV
Myzus persicae	3	24	21	2	6	2	Mock_CMV
Myzus persicae	3	24	21	3	11	3	Mock_CMV
Myzus persicae	3	24	21	4	9	0	Mock_CMV
Myzus persicae	3	24	21	5	8	3	Mock_CMV
Myzus persicae	4	24	21	1	7	2	Mock_CMV
Myzus persicae	4	24	21	3	7	3	Mock_CMV
Myzus persicae	4	24	21	4	3	3	Mock_CMV
Myzus persicae	4	24	21	5	10	2	Mock_CMV
Myzus persicae	1	1	3	1	10	1	Mock_Mock
Myzus persicae	1	1	3	2	2	2	Mock_Mock
Myzus persicae	1	1	3	3	9	3	Mock_Mock
Myzus persicae	1	1	3	4	2	7	Mock_Mock
Myzus persicae	1	1	3	5	5	2	Mock_Mock
Myzus persicae	2	1	3	1	0	11	Mock_Mock
Myzus persicae	2	1	3	2	6	0	Mock_Mock
Myzus persicae	2	1	3	3	0	12	Mock_Mock
Myzus persicae	2	1	3	4	2	4	Mock_Mock
Myzus persicae	2	1	3	5	9	0	Mock_Mock
Myzus persicae	3	1	3	1	6	0	Mock_Mock
Myzus persicae	3	1	3	2	0	12	Mock_Mock
Myzus persicae	3	1	3	3	2	4	Mock_Mock
Myzus persicae	3	1	3	4	9	0	Mock_Mock
Myzus persicae	3	1	3	5	10	1	Mock_Mock
Myzus persicae	4	1	3	1	2	2	Mock_Mock
Myzus persicae	4	1	3	2	9	3	Mock_Mock
Myzus persicae	4	1	3	3	2	7	Mock_Mock
Myzus persicae	4	1	3	4	5	2	Mock_Mock
Myzus persicae	4	1	3	5	0	11	Mock_Mock
Myzus persicae	1	24	3	1	5	13	Mock_Mock
Myzus persicae	1	24	3	2	9	6	Mock_Mock
Myzus persicae	1	24	3	3	10	6	Mock_Mock
Myzus persicae	1	24	3	4	2	12	Mock_Mock
Myzus persicae	1	24	3	5	5	5	Mock_Mock
Myzus persicae	2	24	3	1	9	4	Mock_Mock
Myzus persicae	2	24	3	2	7	0	Mock_Mock
Myzus persicae	2	24	3	3	9	15	Mock_Mock
Myzus persicae	2	24	3	4	2	9	Mock_Mock
Myzus persicae	2	24	3	5	10	1	Mock_Mock
Myzus persicae	3	24	3	1	7	0	Mock_Mock
Myzus persicae	3	24	3	2	9	15	Mock_Mock
Myzus persicae	3	24	3	3	2	9	Mock_Mock
Myzus persicae	3	24	3	4	10	1	Mock_Mock
Myzus persicae	3	24	3	5	5	13	Mock_Mock
Myzus persicae	4	24	3	1	9	6	Mock_Mock
Myzus persicae	4	24	3	2	10	6	Mock_Mock
Myzus persicae	4	24	3	3	2	12	Mock_Mock
Myzus persicae	4	24	3	4	5	5	Mock_Mock
Myzus persicae	4	24	3	5	9	4	Mock_Mock
Myzus persicae	1	1	9	1	2	15	Mock_Mock
Myzus persicae	1	1	9	2	2	14	Mock_Mock
Myzus persicae	1	1	9	3	8	4	Mock_Mock
Myzus persicae	1	1	9	4	13	3	Mock_Mock
Myzus persicae	1	1	9	5	2	7	Mock_Mock
Myzus persicae	1	1	9	6	13	1	Mock_Mock
Myzus persicae	2	1	9	1	15	3	Mock_Mock
Myzus persicae	2	1	9	2	10	3	Mock_Mock
Myzus persicae	2	1	9	3	7	6	Mock_Mock
Myzus persicae	2	1	9	4	10	5	Mock_Mock
Myzus persicae	2	1	9	5	0	12	Mock_Mock
Myzus persicae	3	1	9	1	3	10	Mock_Mock
Myzus persicae	3	1	9	2	7	6	Mock_Mock
Myzus persicae	3	1	9	3	7	4	Mock_Mock
Myzus persicae	3	1	9	4	4	3	Mock_Mock
Myzus persicae	3	1	9	5	2	15	Mock_Mock
Myzus persicae	4	1	9	1	2	14	Mock_Mock
Myzus persicae	4	1	9	2	8	4	Mock_Mock
Myzus persicae	4	1	9	3	13	3	Mock_Mock
Myzus persicae	4	1	9	4	2	7	Mock_Mock
Myzus persicae	4	1	9	5	13	1	Mock_Mock
Myzus persicae	4	1	9	6	15	3	Mock_Mock
Myzus persicae	1	24	9	1	6	8	Mock_Mock
Myzus persicae	1	24	9	2	12	4	Mock_Mock
Myzus persicae	1	24	9	3	9	6	Mock_Mock
Myzus persicae	1	24	9	4	9	4	Mock_Mock
Myzus persicae	1	24	9	5	1	9	Mock_Mock
Myzus persicae	1	24	9	6	9	1	Mock_Mock
Myzus persicae	2	24	9	1	7	11	Mock_Mock
Myzus persicae	2	24	9	2	10	5	Mock_Mock
Myzus persicae	2	24	9	3	6	8	Mock_Mock
Myzus persicae	2	24	9	4	12	4	Mock_Mock
Myzus persicae	2	24	9	5	3	10	Mock_Mock
Myzus persicae	3	24	9	1	5	10	Mock_Mock
Myzus persicae	3	24	9	2	10	5	Mock_Mock
Myzus persicae	3	24	9	3	10	3	Mock_Mock
Myzus persicae	3	24	9	4	6	10	Mock_Mock
Myzus persicae	3	24	9	5	6	8	Mock_Mock
Myzus persicae	4	24	9	1	12	4	Mock_Mock
Myzus persicae	4	24	9	2	9	6	Mock_Mock
Myzus persicae	4	24	9	3	9	4	Mock_Mock
Myzus persicae	4	24	9	4	1	9	Mock_Mock
Myzus persicae	4	24	9	5	9	1	Mock_Mock
Myzus persicae	4	24	9	6	7	11	Mock_Mock
Myzus persicae	1	1	21	1	7	0	Mock_Mock
Myzus persicae	1	1	21	2	3	10	Mock_Mock
Myzus persicae	1	1	21	3	6	0	Mock_Mock
Myzus persicae	1	1	21	4	1	6	Mock_Mock
Myzus persicae	2	1	21	1	0	12	Mock_Mock
Myzus persicae	2	1	21	2	2	4	Mock_Mock
Myzus persicae	2	1	21	3	9	1	Mock_Mock
Myzus persicae	2	1	21	4	9	0	Mock_Mock
Myzus persicae	3	1	21	1	13	1	Mock_Mock
Myzus persicae	3	1	21	2	1	9	Mock_Mock
Myzus persicae	3	1	21	3	4	10	Mock_Mock
Myzus persicae	3	1	21	4	4	6	Mock_Mock
Myzus persicae	4	1	21	1	8	2	Mock_Mock
Myzus persicae	4	1	21	2	7	0	Mock_Mock
Myzus persicae	4	1	21	3	2	7	Mock_Mock
Myzus persicae	4	1	21	4	3	10	Mock_Mock
Myzus persicae	1	24	21	1	9	3	Mock_Mock
Myzus persicae	1	24	21	2	5	6	Mock_Mock
Myzus persicae	1	24	21	3	7	0	Mock_Mock
Myzus persicae	1	24	21	4	2	9	Mock_Mock
Myzus persicae	2	24	21	1	0	15	Mock_Mock
Myzus persicae	2	24	21	2	2	7	Mock_Mock
Myzus persicae	2	24	21	3	10	1	Mock_Mock
Myzus persicae	2	24	21	4	9	1	Mock_Mock
Myzus persicae	3	24	21	1	8	3	Mock_Mock
Myzus persicae	3	24	21	2	8	2	Mock_Mock
Myzus persicae	3	24	21	3	4	9	Mock_Mock
Myzus persicae	3	24	21	4	3	8	Mock_Mock
Myzus persicae	4	24	21	1	5	7	Mock_Mock
Myzus persicae	4	24	21	2	9	3	Mock_Mock
Myzus persicae	4	24	21	3	3	5	Mock_Mock
Myzus persicae	4	24	21	4	5	6	Mock_Mock
Macrosiphum euphorbiae	1	1	3	1	0	0	Mock_CMV
Macrosiphum euphorbiae	1	1	3	2	7	2	Mock_CMV
Macrosiphum euphorbiae	1	1	3	3	6	9	Mock_CMV
Macrosiphum euphorbiae	1	1	3	4	6	5	Mock_CMV
Macrosiphum euphorbiae	1	1	3	5	7	3	Mock_CMV
Macrosiphum euphorbiae	1	1	3	5	7	5	Mock_CMV
Macrosiphum euphorbiae	1	1	3	6	9	3	Mock_CMV
Macrosiphum euphorbiae	2	1	3	1	4	14	Mock_CMV
Macrosiphum euphorbiae	2	1	3	2	5	5	Mock_CMV
Macrosiphum euphorbiae	2	1	3	3	7	5	Mock_CMV
Macrosiphum euphorbiae	2	1	3	4	2	13	Mock_CMV
Macrosiphum euphorbiae	2	1	3	5	7	11	Mock_CMV
Macrosiphum euphorbiae	2	1	3	6	7	10	Mock_CMV
Macrosiphum euphorbiae	2	1	3	7	10	6	Mock_CMV
Macrosiphum euphorbiae	2	1	3	8	2	11	Mock_CMV
Macrosiphum euphorbiae	3	1	3	1	5	9	Mock_CMV
Macrosiphum euphorbiae	3	1	3	2	3	7	Mock_CMV
Macrosiphum euphorbiae	3	1	3	3	5	4	Mock_CMV
Macrosiphum euphorbiae	3	1	3	4	5	6	Mock_CMV
Macrosiphum euphorbiae	3	1	3	5	7	8	Mock_CMV
Macrosiphum euphorbiae	3	1	3	6	3	5	Mock_CMV
Macrosiphum euphorbiae	3	1	3	7	3	7	Mock_CMV
Macrosiphum euphorbiae	3	1	3	8	11	0	Mock_CMV
Macrosiphum euphorbiae	1	24	3	1	0	0	Mock_CMV
Macrosiphum euphorbiae	1	24	3	2	9	2	Mock_CMV
Macrosiphum euphorbiae	1	24	3	3	4	9	Mock_CMV
Macrosiphum euphorbiae	1	24	3	4	7	4	Mock_CMV
Macrosiphum euphorbiae	1	24	3	5	9	6	Mock_CMV
Macrosiphum euphorbiae	1	24	3	6	9	10	Mock_CMV
Macrosiphum euphorbiae	2	24	3	1	10	6	Mock_CMV
Macrosiphum euphorbiae	2	24	3	2	1	14	Mock_CMV
Macrosiphum euphorbiae	2	24	3	3	8	5	Mock_CMV
Macrosiphum euphorbiae	2	24	3	4	8	8	Mock_CMV
Macrosiphum euphorbiae	2	24	3	5	3	12	Mock_CMV
Macrosiphum euphorbiae	2	24	3	6	6	11	Mock_CMV
Macrosiphum euphorbiae	2	24	3	2	5	12	Mock_CMV
Macrosiphum euphorbiae	2	24	3	8	10	8	Mock_CMV
Macrosiphum euphorbiae	3	24	3	1	9	9	Mock_CMV
Macrosiphum euphorbiae	3	24	3	2	8	10	Mock_CMV
Macrosiphum euphorbiae	3	24	3	3	6	14	Mock_CMV
Macrosiphum euphorbiae	3	24	3	4	9	3	Mock_CMV
Macrosiphum euphorbiae	3	24	3	5	5	7	Mock_CMV
Macrosiphum euphorbiae	3	24	3	6	7	7	Mock_CMV
Macrosiphum euphorbiae	3	24	3	7	11	6	Mock_CMV
Macrosiphum euphorbiae	3	24	3	8	6	3	Mock_CMV
Macrosiphum euphorbiae	1	1	9	1	14	2	Mock_CMV
Macrosiphum euphorbiae	1	1	9	2	15	2	Mock_CMV
Macrosiphum euphorbiae	1	1	9	3	8	1	Mock_CMV
Macrosiphum euphorbiae	1	1	9	4	15	1	Mock_CMV
Macrosiphum euphorbiae	1	1	9	5	9	1	Mock_CMV
Macrosiphum euphorbiae	1	1	9	6	13	4	Mock_CMV
Macrosiphum euphorbiae	1	1	9	7	13	3	Mock_CMV
Macrosiphum euphorbiae	1	1	9	8	12	0	Mock_CMV
Macrosiphum euphorbiae	2	1	9	1	12	1	Mock_CMV
Macrosiphum euphorbiae	2	1	9	2	14	1	Mock_CMV
Macrosiphum euphorbiae	2	1	9	3	18	0	Mock_CMV
Macrosiphum euphorbiae	2	1	9	4	8	3	Mock_CMV
Macrosiphum euphorbiae	2	1	9	5	7	4	Mock_CMV
Macrosiphum euphorbiae	2	1	9	6	15	2	Mock_CMV
Macrosiphum euphorbiae	2	1	9	7	15	2	Mock_CMV
Macrosiphum euphorbiae	3	1	9	1	9	6	Mock_CMV
Macrosiphum euphorbiae	3	1	9	2	11	4	Mock_CMV
Macrosiphum euphorbiae	3	1	9	3	13	4	Mock_CMV
Macrosiphum euphorbiae	3	1	9	4	5	3	Mock_CMV
Macrosiphum euphorbiae	3	1	9	5	11	2	Mock_CMV
Macrosiphum euphorbiae	3	1	9	6	7	5	Mock_CMV
Macrosiphum euphorbiae	3	1	9	7	6	1	Mock_CMV
Macrosiphum euphorbiae	3	1	9	8	2	9	Mock_CMV
Macrosiphum euphorbiae	1	24	9	1	10	2	Mock_CMV
Macrosiphum euphorbiae	1	24	9	2	12	1	Mock_CMV
Macrosiphum euphorbiae	1	24	9	3	8	1	Mock_CMV
Macrosiphum euphorbiae	1	24	9	4	12	1	Mock_CMV
Macrosiphum euphorbiae	1	24	9	5	5	7	Mock_CMV
Macrosiphum euphorbiae	1	24	9	6	17	3	Mock_CMV
Macrosiphum euphorbiae	1	24	9	7	12	2	Mock_CMV
Macrosiphum euphorbiae	1	24	9	8	5	5	Mock_CMV
Macrosiphum euphorbiae	2	24	9	1	11	3	Mock_CMV
Macrosiphum euphorbiae	2	24	9	2	12	1	Mock_CMV
Macrosiphum euphorbiae	2	24	9	3	13	2	Mock_CMV
Macrosiphum euphorbiae	2	24	9	4	5	2	Mock_CMV
Macrosiphum euphorbiae	2	24	9	5	7	1	Mock_CMV
Macrosiphum euphorbiae	2	24	9	6	11	5	Mock_CMV
Macrosiphum euphorbiae	2	24	9	7	13	4	Mock_CMV
Macrosiphum euphorbiae	3	24	9	1	14	3	Mock_CMV
Macrosiphum euphorbiae	3	24	9	2	11	4	Mock_CMV
Macrosiphum euphorbiae	3	24	9	3	12	1	Mock_CMV
Macrosiphum euphorbiae	3	24	9	4	10	2	Mock_CMV
Macrosiphum euphorbiae	3	24	9	5	12	6	Mock_CMV
Macrosiphum euphorbiae	3	24	9	6	8	6	Mock_CMV
Macrosiphum euphorbiae	3	24	9	7	7	6	Mock_CMV
Macrosiphum euphorbiae	3	24	9	8	9	4	Mock_CMV
Macrosiphum euphorbiae	1	1	21	1	7	1	Mock_CMV
Macrosiphum euphorbiae	1	1	21	2	8	0	Mock_CMV
Macrosiphum euphorbiae	1	1	21	3	6	4	Mock_CMV
Macrosiphum euphorbiae	1	1	21	4	12	2	Mock_CMV
Macrosiphum euphorbiae	1	1	21	5	8	4	Mock_CMV
Macrosiphum euphorbiae	1	1	21	6	7	3	Mock_CMV
Macrosiphum euphorbiae	1	1	21	7	4	10	Mock_CMV
Macrosiphum euphorbiae	1	1	21	8	8	3	Mock_CMV
Macrosiphum euphorbiae	2	1	21	2	15	0	Mock_CMV
Macrosiphum euphorbiae	2	1	21	3	7	1	Mock_CMV
Macrosiphum euphorbiae	2	1	21	4	8	0	Mock_CMV
Macrosiphum euphorbiae	2	1	21	5	6	4	Mock_CMV
Macrosiphum euphorbiae	2	1	21	6	12	2	Mock_CMV
Macrosiphum euphorbiae	2	1	21	7	8	4	Mock_CMV
Macrosiphum euphorbiae	2	1	21	8	4	1	Mock_CMV
Macrosiphum euphorbiae	2	1	21	9	8	3	Mock_CMV
Macrosiphum euphorbiae	2	1	21	10	10	2	Mock_CMV
Macrosiphum euphorbiae	3	1	21	1	11	2	Mock_CMV
Macrosiphum euphorbiae	3	1	21	2	11	0	Mock_CMV
Macrosiphum euphorbiae	3	1	21	3	2	7	Mock_CMV
Macrosiphum euphorbiae	3	1	21	4	7	3	Mock_CMV
Macrosiphum euphorbiae	3	1	21	5	4	10	Mock_CMV
Macrosiphum euphorbiae	3	1	21	6	8	3	Mock_CMV
Macrosiphum euphorbiae	3	1	21	7	15	0	Mock_CMV
Macrosiphum euphorbiae	1	24	21	1	10	4	Mock_CMV
Macrosiphum euphorbiae	1	24	21	2	5	2	Mock_CMV
Macrosiphum euphorbiae	1	24	21	3	9	4	Mock_CMV
Macrosiphum euphorbiae	1	24	21	4	8	1	Mock_CMV
Macrosiphum euphorbiae	1	24	21	5	7	5	Mock_CMV
Macrosiphum euphorbiae	1	24	21	6	7	6	Mock_CMV
Macrosiphum euphorbiae	1	24	21	7	6	3	Mock_CMV
Macrosiphum euphorbiae	1	24	21	8	9	4	Mock_CMV
Macrosiphum euphorbiae	2	24	21	1	12	1	Mock_CMV
Macrosiphum euphorbiae	2	24	21	2	10	4	Mock_CMV
Macrosiphum euphorbiae	2	24	21	3	5	2	Mock_CMV
Macrosiphum euphorbiae	2	24	21	4	9	4	Mock_CMV
Macrosiphum euphorbiae	2	24	21	5	8	1	Mock_CMV
Macrosiphum euphorbiae	2	24	21	6	7	5	Mock_CMV
Macrosiphum euphorbiae	2	24	21	7	6	1	Mock_CMV
Macrosiphum euphorbiae	2	24	21	8	6	5	Mock_CMV
Macrosiphum euphorbiae	2	24	21	9	4	4	Mock_CMV
Macrosiphum euphorbiae	2	24	21	10	6	4	Mock_CMV
Macrosiphum euphorbiae	3	24	21	1	8	1	Mock_CMV
Macrosiphum euphorbiae	3	24	21	2	8	1	Mock_CMV
Macrosiphum euphorbiae	3	24	21	3	7	6	Mock_CMV
Macrosiphum euphorbiae	3	24	21	4	6	2	Mock_CMV
Macrosiphum euphorbiae	3	24	21	5	9	4	Mock_CMV
Macrosiphum euphorbiae	3	24	21	6	12	1	Mock_CMV
Macrosiphum euphorbiae	3	24	21	7	13	2	Mock_CMV
Macrosiphum euphorbiae	1	1	3	1	5	9	Mock_Mock
Macrosiphum euphorbiae	1	1	3	2	3	2	Mock_Mock
Macrosiphum euphorbiae	1	1	3	3	2	8	Mock_Mock
Macrosiphum euphorbiae	1	1	3	4	5	2	Mock_Mock
Macrosiphum euphorbiae	2	1	3	1	2	13	Mock_Mock
Macrosiphum euphorbiae	2	1	3	2	7	7	Mock_Mock
Macrosiphum euphorbiae	2	1	3	3	4	9	Mock_Mock
Macrosiphum euphorbiae	2	1	3	4	6	1	Mock_Mock
Macrosiphum euphorbiae	2	1	3	5	3	11	Mock_Mock
Macrosiphum euphorbiae	3	1	3	1	8	9	Mock_Mock
Macrosiphum euphorbiae	3	1	3	2	8	7	Mock_Mock
Macrosiphum euphorbiae	3	1	3	3	4	8	Mock_Mock
Macrosiphum euphorbiae	3	1	3	4	9	6	Mock_Mock
Macrosiphum euphorbiae	3	1	3	5	6	5	Mock_Mock
Macrosiphum euphorbiae	1	24	3	1	7	7	Mock_Mock
Macrosiphum euphorbiae	1	24	3	2	2	6	Mock_Mock
Macrosiphum euphorbiae	1	24	3	3	5	7	Mock_Mock
Macrosiphum euphorbiae	1	24	3	4	7	1	Mock_Mock
Macrosiphum euphorbiae	2	24	3	1	2	11	Mock_Mock
Macrosiphum euphorbiae	2	24	3	2	7	8	Mock_Mock
Macrosiphum euphorbiae	2	24	3	3	2	8	Mock_Mock
Macrosiphum euphorbiae	2	24	3	4	14	1	Mock_Mock
Macrosiphum euphorbiae	2	24	3	5	4	12	Mock_Mock
Macrosiphum euphorbiae	3	24	3	1	7	8	Mock_Mock
Macrosiphum euphorbiae	3	24	3	2	10	8	Mock_Mock
Macrosiphum euphorbiae	3	24	3	3	4	6	Mock_Mock
Macrosiphum euphorbiae	3	24	3	4	10	9	Mock_Mock
Macrosiphum euphorbiae	3	24	3	5	12	8	Mock_Mock
Macrosiphum euphorbiae	1	1	9	1	11	5	Mock_Mock
Macrosiphum euphorbiae	1	1	9	2	8	4	Mock_Mock
Macrosiphum euphorbiae	1	1	9	3	5	9	Mock_Mock
Macrosiphum euphorbiae	1	1	9	4	5	8	Mock_Mock
Macrosiphum euphorbiae	2	1	9	1	9	7	Mock_Mock
Macrosiphum euphorbiae	2	1	9	2	12	3	Mock_Mock
Macrosiphum euphorbiae	2	1	9	3	5	10	Mock_Mock
Macrosiphum euphorbiae	2	1	9	4	10	3	Mock_Mock
Macrosiphum euphorbiae	3	1	9	1	8	8	Mock_Mock
Macrosiphum euphorbiae	3	1	9	2	11	3	Mock_Mock
Macrosiphum euphorbiae	3	1	9	3	1	1	Mock_Mock
Macrosiphum euphorbiae	3	1	9	4	0	2	Mock_Mock
Macrosiphum euphorbiae	1	24	9	1	13	3	Mock_Mock
Macrosiphum euphorbiae	1	24	9	2	7	5	Mock_Mock
Macrosiphum euphorbiae	1	24	9	3	10	10	Mock_Mock
Macrosiphum euphorbiae	1	24	9	4	4	12	Mock_Mock
Macrosiphum euphorbiae	2	24	9	1	7	4	Mock_Mock
Macrosiphum euphorbiae	2	24	9	2	8	4	Mock_Mock
Macrosiphum euphorbiae	2	24	9	3	6	13	Mock_Mock
Macrosiphum euphorbiae	2	24	9	4	9	6	Mock_Mock
Macrosiphum euphorbiae	3	24	9	1	9	7	Mock_Mock
Macrosiphum euphorbiae	3	24	9	2	6	5	Mock_Mock
Macrosiphum euphorbiae	3	24	9	3	1	2	Mock_Mock
Macrosiphum euphorbiae	3	24	9	4	2	1	Mock_Mock
Macrosiphum euphorbiae	1	1	21	1	10	2	Mock_Mock
Macrosiphum euphorbiae	1	1	21	2	7	6	Mock_Mock
Macrosiphum euphorbiae	1	1	21	3	3	7	Mock_Mock
Macrosiphum euphorbiae	1	1	21	4	2	13	Mock_Mock
Macrosiphum euphorbiae	2	1	21	1	4	1	Mock_Mock
Macrosiphum euphorbiae	2	1	21	2	3	9	Mock_Mock
Macrosiphum euphorbiae	2	1	21	3	2	10	Mock_Mock
Macrosiphum euphorbiae	2	1	21	4	9	1	Mock_Mock
Macrosiphum euphorbiae	3	1	21	1	4	1	Mock_Mock
Macrosiphum euphorbiae	3	1	21	2	3	9	Mock_Mock
Macrosiphum euphorbiae	3	1	21	3	2	10	Mock_Mock
Macrosiphum euphorbiae	3	1	21	4	9	1	Mock_Mock
Macrosiphum euphorbiae	1	24	21	1	9	4	Mock_Mock
Macrosiphum euphorbiae	1	24	21	2	5	3	Mock_Mock
Macrosiphum euphorbiae	1	24	21	3	7	2	Mock_Mock
Macrosiphum euphorbiae	1	24	21	4	1	9	Mock_Mock
Macrosiphum euphorbiae	2	24	21	1	4	2	Mock_Mock
Macrosiphum euphorbiae	2	24	21	2	4	11	Mock_Mock
Macrosiphum euphorbiae	2	24	21	3	2	7	Mock_Mock
Macrosiphum euphorbiae	2	24	21	4	9	3	Mock_Mock
Macrosiphum euphorbiae	3	24	21	1	4	2	Mock_Mock
Macrosiphum euphorbiae	3	24	21	2	4	11	Mock_Mock
Macrosiphum euphorbiae	3	24	21	3	2	7	Mock_Mock
Macrosiphum euphorbiae	3	24	21	4	9	3	Mock_Mock

## Sheet: Figure 2 &Figure S3
vector	environment	experiment	treatment.pair	A	B	A_B
Myzus persicae	Normal light	1	1	13	0	Mock_CMV
Myzus persicae	Normal light	1	2	4	3	Mock_CMV
Myzus persicae	Normal light	1	3	6	4	Mock_CMV
Myzus persicae	Normal light	1	4	6	4	Mock_CMV
Myzus persicae	Normal light	1	5	12	1	Mock_CMV
Myzus persicae	Normal light	1	6	4	4	Mock_CMV
Myzus persicae	Normal light	1	7	11	1	Mock_CMV
Myzus persicae	Normal light	1	1	9	5	Mock_CMV
Myzus persicae	Normal light	1	2	3	5	Mock_CMV
Myzus persicae	Normal light	1	3	6	5	Mock_CMV
Myzus persicae	Normal light	1	4	3	5	Mock_CMV
Myzus persicae	Normal light	2	1	15	3	Mock_CMV
Myzus persicae	Normal light	2	2	9	1	Mock_CMV
Myzus persicae	Normal light	2	3	9	4	Mock_CMV
Myzus persicae	Normal light	2	4	12	4	Mock_CMV
Myzus persicae	Normal light	2	5	6	1	Mock_CMV
Myzus persicae	Normal light	2	6	13	2	Mock_CMV
Myzus persicae	Normal light	3	7	14	6	Mock_CMV
Myzus persicae	Normal light	3	8	10	2	Mock_CMV
Myzus persicae	Normal light	3	9	5	8	Mock_CMV
Myzus persicae	Normal light	3	10	11	1	Mock_CMV
Myzus persicae	Normal light	3	11	6	8	Mock_CMV
Myzus persicae	Normal light	3	12	10	1	Mock_CMV
Myzus persicae	Normal light	3	13	7	3	Mock_CMV
Myzus persicae	Normal light	1	1	3	7	Mock_Mock
Myzus persicae	Normal light	1	2	5	7	Mock_Mock
Myzus persicae	Normal light	1	3	1	6	Mock_Mock
Myzus persicae	Normal light	1	4	7	3	Mock_Mock
Myzus persicae	Normal light	1	5	6	2	Mock_Mock
Myzus persicae	Normal light	1	6	4	9	Mock_Mock
Myzus persicae	Normal light	1	7	9	4	Mock_Mock
Myzus persicae	Normal light	2	1	8	7	Mock_Mock
Myzus persicae	Normal light	2	2	3	8	Mock_Mock
Myzus persicae	Normal light	2	3	8	6	Mock_Mock
Myzus persicae	Normal light	2	4	3	7	Mock_Mock
Myzus persicae	Normal light	2	5	5	7	Mock_Mock
Myzus persicae	Normal light	2	6	1	6	Mock_Mock
Myzus persicae	Normal light	2	7	7	3	Mock_Mock
Myzus persicae	Normal light	2	8	6	2	Mock_Mock
Myzus persicae	Normal light	2	9	4	9	Mock_Mock
Myzus persicae	Normal light	2	10	9	4	Mock_Mock
Myzus persicae	Normal light	3	1	2	7	Mock_Mock
Myzus persicae	Normal light	3	2	5	2	Mock_Mock
Myzus persicae	Normal light	3	3	2	15	Mock_Mock
Myzus persicae	Normal light	3	4	2	14	Mock_Mock
Myzus persicae	Normal light	3	5	8	4	Mock_Mock
Myzus persicae	Normal light	3	6	13	3	Mock_Mock
Myzus persicae	Normal light	3	7	2	7	Mock_Mock
Myzus persicae	Dark	1	1	2	0	Mock_CMV
Myzus persicae	Dark	1	2	2	1	Mock_CMV
Myzus persicae	Dark	1	3	4	1	Mock_CMV
Myzus persicae	Dark	1	4	4	1	Mock_CMV
Myzus persicae	Dark	1	4	2	2	Mock_CMV
Myzus persicae	Dark	1	5	3	3	Mock_CMV
Myzus persicae	Dark	1	6	3	4	Mock_CMV
Myzus persicae	Dark	1	7	7	0	Mock_CMV
Myzus persicae	Dark	1	8	6	2	Mock_CMV
Myzus persicae	Dark	1	9	2	7	Mock_CMV
Myzus persicae	Dark	1	10	2	4	Mock_CMV
Myzus persicae	Dark	2	1	3	1	Mock_CMV
Myzus persicae	Dark	2	2	3	2	Mock_CMV
Myzus persicae	Dark	2	3	3	0	Mock_CMV
Myzus persicae	Dark	2	4	1	2	Mock_CMV
Myzus persicae	Dark	2	5	0	3	Mock_CMV
Myzus persicae	Dark	2	6	1	2	Mock_CMV
Myzus persicae	Dark	3	1	1	4	Mock_CMV
Myzus persicae	Dark	3	2	5	2	Mock_CMV
Myzus persicae	Dark	3	3	4	2	Mock_CMV
Myzus persicae	Dark	3	4	2	3	Mock_CMV
Myzus persicae	Dark	3	5	8	4	Mock_CMV
Myzus persicae	Dark	3	6	3	3	Mock_CMV
Myzus persicae	Dark	3	7	1	5	Mock_CMV
Myzus persicae	Dark	3	8	6	4	Mock_CMV
Myzus persicae	Dark	3	9	6	3	Mock_CMV
Myzus persicae	Dark	3	10	2	8	Mock_CMV
Myzus persicae	Dark	3	11	2	5	Mock_CMV
Myzus persicae	Dark	3	12	2	2	Mock_CMV
Myzus persicae	Dark	3	13	2	0	Mock_CMV
Myzus persicae	Dark	1	1	3	3	Mock_Mock
Myzus persicae	Dark	1	2	4	0	Mock_Mock
Myzus persicae	Dark	1	3	2	3	Mock_Mock
Myzus persicae	Dark	1	4	1	7	Mock_Mock
Myzus persicae	Dark	1	5	1	3	Mock_Mock
Myzus persicae	Dark	1	6	1	5	Mock_Mock
Myzus persicae	Dark	1	7	3	2	Mock_Mock
Myzus persicae	Dark	1	8	3	9	Mock_Mock
Myzus persicae	Dark	1	9	3	1	Mock_Mock
Myzus persicae	Dark	1	10	5	4	Mock_Mock
Myzus persicae	Dark	2	1	5	1	Mock_Mock
Myzus persicae	Dark	2	2	2	2	Mock_Mock
Myzus persicae	Dark	2	3	3	5	Mock_Mock
Myzus persicae	Dark	2	4	2	5	Mock_Mock
Myzus persicae	Dark	2	5	4	1	Mock_Mock
Myzus persicae	Dark	2	6	6	3	Mock_Mock
Myzus persicae	Dark	2	7	4	3	Mock_Mock
Myzus persicae	Dark	3	1	1	2	Mock_Mock
Myzus persicae	Dark	3	2	1	5	Mock_Mock
Myzus persicae	Dark	3	3	2	3	Mock_Mock
Myzus persicae	Dark	3	4	4	2	Mock_Mock
Myzus persicae	Dark	3	5	1	1	Mock_Mock
Myzus persicae	Dark	3	6	3	3	Mock_Mock
Myzus persicae	Dark	3	7	2	8	Mock_Mock
Myzus persicae	Dark	3	8	5	7	Mock_Mock
Macrosiphum euphorbiae	Normal light	1	1	11	3	Mock_CMV
Macrosiphum euphorbiae	Normal light	1	2	17	5	Mock_CMV
Macrosiphum euphorbiae	Normal light	1	3	17	10	Mock_CMV
Macrosiphum euphorbiae	Normal light	1	4	10	4	Mock_CMV
Macrosiphum euphorbiae	Normal light	1	5	22	2	Mock_CMV
Macrosiphum euphorbiae	Normal light	1	6	10	5	Mock_CMV
Macrosiphum euphorbiae	Normal light	1	7	15	7	Mock_CMV
Macrosiphum euphorbiae	Normal light	1	8	10	6	Mock_CMV
Macrosiphum euphorbiae	Normal light	2	1	13	5	Mock_CMV
Macrosiphum euphorbiae	Normal light	2	2	2	11	Mock_CMV
Macrosiphum euphorbiae	Normal light	2	3	16	0	Mock_CMV
Macrosiphum euphorbiae	Normal light	2	4	13	4	Mock_CMV
Macrosiphum euphorbiae	Normal light	2	5	10	3	Mock_CMV
Macrosiphum euphorbiae	Normal light	3	1	8	3	Mock_CMV
Macrosiphum euphorbiae	Normal light	3	2	2	6	Mock_CMV
Macrosiphum euphorbiae	Normal light	3	3	7	4	Mock_CMV
Macrosiphum euphorbiae	Normal light	3	4	15	2	Mock_CMV
Macrosiphum euphorbiae	Normal light	3	5	9	6	Mock_CMV
Macrosiphum euphorbiae	Normal light	3	1	15	2	Mock_CMV
Macrosiphum euphorbiae	Normal light	1	1	2	6	Mock_Mock
Macrosiphum euphorbiae	Normal light	1	2	6	4	Mock_Mock
Macrosiphum euphorbiae	Normal light	1	3	5	4	Mock_Mock
Macrosiphum euphorbiae	Normal light	1	4	8	8	Mock_Mock
Macrosiphum euphorbiae	Normal light	1	5	11	3	Mock_Mock
Macrosiphum euphorbiae	Normal light	1	6	1	1	Mock_Mock
Macrosiphum euphorbiae	Normal light	1	7	0	2	Mock_Mock
Macrosiphum euphorbiae	Normal light	2	1	6	1	Mock_Mock
Macrosiphum euphorbiae	Normal light	2	2	5	3	Mock_Mock
Macrosiphum euphorbiae	Normal light	2	3	3	6	Mock_Mock
Macrosiphum euphorbiae	Normal light	2	4	4	4	Mock_Mock
Macrosiphum euphorbiae	Normal light	3	1	8	9	Mock_Mock
Macrosiphum euphorbiae	Normal light	3	2	14	2	Mock_Mock
Macrosiphum euphorbiae	Normal light	3	3	3	8	Mock_Mock
Macrosiphum euphorbiae	Normal light	3	4	4	9	Mock_Mock
Macrosiphum euphorbiae	Normal light	3	5	5	3	Mock_Mock
Macrosiphum euphorbiae	Dark	1	1	4	0	Mock_CMV
Macrosiphum euphorbiae	Dark	1	2	0	4	Mock_CMV
Macrosiphum euphorbiae	Dark	1	3	3	2	Mock_CMV
Macrosiphum euphorbiae	Dark	1	4	8	3	Mock_CMV
Macrosiphum euphorbiae	Dark	1	5	5	3	Mock_CMV
Macrosiphum euphorbiae	Dark	1	6	3	5	Mock_CMV
Macrosiphum euphorbiae	Dark	2	1	4	3	Mock_CMV
Macrosiphum euphorbiae	Dark	2	2	5	4	Mock_CMV
Macrosiphum euphorbiae	Dark	2	3	5	5	Mock_CMV
Macrosiphum euphorbiae	Dark	2	4	5	2	Mock_CMV
Macrosiphum euphorbiae	Dark	2	5	6	3	Mock_CMV
Macrosiphum euphorbiae	Dark	2	6	4	4	Mock_CMV
Macrosiphum euphorbiae	Dark	2	7	1	5	Mock_CMV
Macrosiphum euphorbiae	Dark	2	8	3	4	Mock_CMV
Macrosiphum euphorbiae	Dark	3	1	3	4	Mock_CMV
Macrosiphum euphorbiae	Dark	3	2	8	4	Mock_CMV
Macrosiphum euphorbiae	Dark	3	3	3	6	Mock_CMV
Macrosiphum euphorbiae	Dark	3	4	5	6	Mock_CMV
Macrosiphum euphorbiae	Dark	3	5	4	2	Mock_CMV
Macrosiphum euphorbiae	Dark	3	6	1	4	Mock_CMV
Macrosiphum euphorbiae	Dark	3	7	6	1	Mock_CMV
Macrosiphum euphorbiae	Dark	3	8	6	8	Mock_CMV
Macrosiphum euphorbiae	Dark	3	9	3	3	Mock_CMV
Macrosiphum euphorbiae	Dark	1	1	4	3	Mock_Mock
Macrosiphum euphorbiae	Dark	1	2	2	2	Mock_Mock
Macrosiphum euphorbiae	Dark	1	3	3	3	Mock_Mock
Macrosiphum euphorbiae	Dark	1	4	2	1	Mock_Mock
Macrosiphum euphorbiae	Dark	2	1	3	1	Mock_Mock
Macrosiphum euphorbiae	Dark	2	2	0	3	Mock_Mock
Macrosiphum euphorbiae	Dark	2	3	4	2	Mock_Mock
Macrosiphum euphorbiae	Dark	2	4	3	1	Mock_Mock
Macrosiphum euphorbiae	Dark	2	5	5	9	Mock_Mock
Macrosiphum euphorbiae	Dark	2	6	3	2	Mock_Mock
Macrosiphum euphorbiae	Dark	2	7	2	8	Mock_Mock
Macrosiphum euphorbiae	Dark	3	1	5	2	Mock_Mock
Macrosiphum euphorbiae	Dark	3	2	7	7	Mock_Mock
Macrosiphum euphorbiae	Dark	3	3	2	6	Mock_Mock
Macrosiphum euphorbiae	Dark	3	4	5	7	Mock_Mock
Macrosiphum euphorbiae	Dark	3	5	7	3	Mock_Mock

## Sheet: Figure 3 data
vector	experiment	A	B	A_B
Myzus persicae	1	0	1	Mock_CMV
Myzus persicae	1	0	1	Mock_CMV
Myzus persicae	1	0	1	Mock_CMV
Myzus persicae	1	0	1	Mock_CMV
Myzus persicae	1	0	1	Mock_CMV
Myzus persicae	1	0	1	Mock_CMV
Myzus persicae	1	0	1	Mock_CMV
Myzus persicae	1	0	1	Mock_CMV
Myzus persicae	1	0	1	Mock_CMV
Myzus persicae	1	0	1	Mock_CMV
Myzus persicae	1	0	1	Mock_CMV
Myzus persicae	1	1	0	Mock_CMV
Myzus persicae	1	0	1	Mock_CMV
Myzus persicae	1	0	1	Mock_CMV
Myzus persicae	1	0	1	Mock_CMV
Myzus persicae	1	1	0	Mock_CMV
Myzus persicae	1	0	1	Mock_CMV
Myzus persicae	1	1	0	Mock_CMV
Myzus persicae	1	0	1	Mock_CMV
Myzus persicae	1	0	1	Mock_CMV
Myzus persicae	1	0	1	Mock_CMV
Myzus persicae	1	1	0	Mock_CMV
Myzus persicae	1	0	1	Mock_CMV
Myzus persicae	1	0	1	Mock_CMV
Myzus persicae	2	1	0	Mock_CMV
Myzus persicae	2	0	1	Mock_CMV
Myzus persicae	2	1	1	Mock_CMV
Myzus persicae	2	0	1	Mock_CMV
Myzus persicae	2	1	0	Mock_CMV
Myzus persicae	2	0	1	Mock_CMV
Myzus persicae	2	0	1	Mock_CMV
Myzus persicae	2	0	1	Mock_CMV
Myzus persicae	2	1	0	Mock_CMV
Myzus persicae	2	1	0	Mock_CMV
Myzus persicae	2	0	1	Mock_CMV
Myzus persicae	2	0	1	Mock_CMV
Myzus persicae	2	0	1	Mock_CMV
Myzus persicae	2	1	0	Mock_CMV
Myzus persicae	2	1	0	Mock_CMV
Myzus persicae	2	1	0	Mock_CMV
Myzus persicae	2	0	1	Mock_CMV
Myzus persicae	2	0	1	Mock_CMV
Myzus persicae	2	0	1	Mock_CMV
Myzus persicae	2	0	1	Mock_CMV
Myzus persicae	2	0	1	Mock_CMV
Myzus persicae	2	1	0	Mock_CMV
Myzus persicae	2	0	1	Mock_CMV
Myzus persicae	2	1	0	Mock_CMV
Myzus persicae	2	1	1	Mock_CMV
Myzus persicae	2	0	1	Mock_CMV
Myzus persicae	2	1	0	Mock_CMV
Myzus persicae	2	0	1	Mock_CMV
Myzus persicae	2	0	1	Mock_CMV
Myzus persicae	2	0	1	Mock_CMV
Myzus persicae	2	0	1	Mock_CMV
Myzus persicae	2	0	1	Mock_CMV
Myzus persicae	2	0	1	Mock_CMV
Myzus persicae	2	1	0	Mock_CMV
Myzus persicae	2	1	0	Mock_CMV
Myzus persicae	2	1	0	Mock_CMV
Myzus persicae	2	1	0	Mock_CMV
Myzus persicae	2	0	1	Mock_CMV
Myzus persicae	2	0	1	Mock_CMV
Myzus persicae	2	0	1	Mock_CMV
Myzus persicae	2	0	1	Mock_CMV
Myzus persicae	2	0	1	Mock_CMV
Myzus persicae	2	0	1	Mock_CMV
Myzus persicae	2	0	1	Mock_CMV
Myzus persicae	3	0	1	Mock_CMV
Myzus persicae	3	0	1	Mock_CMV
Myzus persicae	3	0	1	Mock_CMV
Myzus persicae	3	0	1	Mock_CMV
Myzus persicae	3	1	1	Mock_CMV
Myzus persicae	3	0	1	Mock_CMV
Myzus persicae	3	0	1	Mock_CMV
Myzus persicae	3	0	1	Mock_CMV
Myzus persicae	3	0	1	Mock_CMV
Myzus persicae	3	1	0	Mock_CMV
Myzus persicae	3	0	1	Mock_CMV
Myzus persicae	3	1	0	Mock_CMV
Myzus persicae	3	1	0	Mock_CMV
Myzus persicae	3	0	1	Mock_CMV
Myzus persicae	3	1	0	Mock_CMV
Myzus persicae	3	0	1	Mock_CMV
Myzus persicae	3	0	1	Mock_CMV
Myzus persicae	3	1	1	Mock_CMV
Myzus persicae	3	0	1	Mock_CMV
Myzus persicae	3	1	0	Mock_CMV
Myzus persicae	3	0	1	Mock_CMV
Myzus persicae	3	0	1	Mock_CMV
Myzus persicae	3	1	0	Mock_CMV
Myzus persicae	3	1	1	Mock_CMV
Myzus persicae	3	0	1	Mock_CMV
Myzus persicae	3	1	1	Mock_CMV
Myzus persicae	3	0	1	Mock_CMV
Myzus persicae	3	1	0	Mock_CMV
Myzus persicae	1	1	1	Mock_Mock
Myzus persicae	1	1	0	Mock_Mock
Myzus persicae	1	1	1	Mock_Mock
Myzus persicae	1	0	0	Mock_Mock
Myzus persicae	1	0	1	Mock_Mock
Myzus persicae	1	0	1	Mock_Mock
Myzus persicae	1	1	0	Mock_Mock
Myzus persicae	1	1	0	Mock_Mock
Myzus persicae	1	1	0	Mock_Mock
Myzus persicae	1	1	0	Mock_Mock
Myzus persicae	1	1	0	Mock_Mock
Myzus persicae		1	0	Mock_Mock
Myzus persicae	1	1	1	Mock_Mock
Myzus persicae	1	0	1	Mock_Mock
Myzus persicae	1	0	1	Mock_Mock
Myzus persicae	1	0	1	Mock_Mock
Myzus persicae	1	0	1	Mock_Mock
Myzus persicae	2	0	1	Mock_Mock
Myzus persicae	2	1	1	Mock_Mock
Myzus persicae	2	1	1	Mock_Mock
Myzus persicae	2	1	0	Mock_Mock
Myzus persicae	2	1	1	Mock_Mock
Myzus persicae	2	1	1	Mock_Mock
Myzus persicae	2	0	1	Mock_Mock
Myzus persicae	2	1	0	Mock_Mock
Myzus persicae	2	1	0	Mock_Mock
Myzus persicae	2	1	1	Mock_Mock
Myzus persicae	2	1	0	Mock_Mock
Myzus persicae	2	1	0	Mock_Mock
Myzus persicae	2	0	1	Mock_Mock
Myzus persicae	2	0	1	Mock_Mock
Myzus persicae	2	0	1	Mock_Mock
Myzus persicae	2	1	0	Mock_Mock
Myzus persicae	2	1	1	Mock_Mock
Myzus persicae	2	0	1	Mock_Mock
Myzus persicae	2	1	0	Mock_Mock
Myzus persicae	3	1	0	Mock_Mock
Myzus persicae	3	0	1	Mock_Mock
Myzus persicae	3	1	0	Mock_Mock
Myzus persicae	3	1	0	Mock_Mock
Myzus persicae	3	1	1	Mock_Mock
Myzus persicae	3	1	0	Mock_Mock
Myzus persicae	3	1	0	Mock_Mock
Myzus persicae	3	1	1	Mock_Mock
Myzus persicae	3	1	1	Mock_Mock
Myzus persicae	3	0	1	Mock_Mock
Myzus persicae	3	0	1	Mock_Mock
Myzus persicae	3	1	0	Mock_Mock
Myzus persicae	3	1	0	Mock_Mock
Myzus persicae	3	0	1	Mock_Mock
Myzus persicae	3	1	0	Mock_Mock
Myzus persicae	3	1	0	Mock_Mock
Myzus persicae	3	0	1	Mock_Mock
Myzus persicae	3	0	1	Mock_Mock
Myzus persicae	3	1	1	Mock_Mock
Myzus persicae	3	0	1	Mock_Mock
Myzus persicae	3	0	1	Mock_Mock
Myzus persicae	3	1	0	Mock_Mock
Macrosiphum euphorbiae	1	0	1	Mock_CMV
Macrosiphum euphorbiae	1	1	0	Mock_CMV
Macrosiphum euphorbiae	1	1	0	Mock_CMV
Macrosiphum euphorbiae	1	0	1	Mock_CMV
Macrosiphum euphorbiae	1	0	1	Mock_CMV
Macrosiphum euphorbiae	1	0	1	Mock_CMV
Macrosiphum euphorbiae	1	0	1	Mock_CMV
Macrosiphum euphorbiae	1	0	1	Mock_CMV
Macrosiphum euphorbiae	1	1	0	Mock_CMV
Macrosiphum euphorbiae	1	0	1	Mock_CMV
Macrosiphum euphorbiae	1	1	0	Mock_CMV
Macrosiphum euphorbiae	1	1	0	Mock_CMV
Macrosiphum euphorbiae	1	0	1	Mock_CMV
Macrosiphum euphorbiae	1	1	0	Mock_CMV
Macrosiphum euphorbiae	1	0	1	Mock_CMV
Macrosiphum euphorbiae	1	0	1	Mock_CMV
Macrosiphum euphorbiae	1	0	1	Mock_CMV
Macrosiphum euphorbiae	1	1	0	Mock_CMV
Macrosiphum euphorbiae	1	1	0	Mock_CMV
Macrosiphum euphorbiae	1	0	1	Mock_CMV
Macrosiphum euphorbiae	1	0	1	Mock_CMV
Macrosiphum euphorbiae	1	1	0	Mock_CMV
Macrosiphum euphorbiae	1	0	1	Mock_CMV
Macrosiphum euphorbiae	1	0	1	Mock_CMV
Macrosiphum euphorbiae	1	0	1	Mock_CMV
Macrosiphum euphorbiae	1	1	0	Mock_CMV
Macrosiphum euphorbiae	1	0	1	Mock_CMV
Macrosiphum euphorbiae	1	1	0	Mock_CMV
Macrosiphum euphorbiae	1	0	1	Mock_CMV
Macrosiphum euphorbiae	1	0	1	Mock_CMV
Macrosiphum euphorbiae	1	0	1	Mock_CMV
Macrosiphum euphorbiae	2	0	1	Mock_CMV
Macrosiphum euphorbiae	2	0	1	Mock_CMV
Macrosiphum euphorbiae	2	0	1	Mock_CMV
Macrosiphum euphorbiae	2	1	0	Mock_CMV
Macrosiphum euphorbiae	2	1	0	Mock_CMV
Macrosiphum euphorbiae	2	1	0	Mock_CMV
Macrosiphum euphorbiae	2	0	1	Mock_CMV
Macrosiphum euphorbiae	2	1	0	Mock_CMV
Macrosiphum euphorbiae	2	0	1	Mock_CMV
Macrosiphum euphorbiae	2	0	1	Mock_CMV
Macrosiphum euphorbiae	2	0	1	Mock_CMV
Macrosiphum euphorbiae	2	1	0	Mock_CMV
Macrosiphum euphorbiae	2	0	1	Mock_CMV
Macrosiphum euphorbiae	2	1	0	Mock_CMV
Macrosiphum euphorbiae	2	0	1	Mock_CMV
Macrosiphum euphorbiae	2	0	1	Mock_CMV
Macrosiphum euphorbiae	2	1	0	Mock_CMV
Macrosiphum euphorbiae	2	0	1	Mock_CMV
Macrosiphum euphorbiae	2	0	1	Mock_CMV
Macrosiphum euphorbiae	2	0	1	Mock_CMV
Macrosiphum euphorbiae	2	0	1	Mock_CMV
Macrosiphum euphorbiae	2	0	1	Mock_CMV
Macrosiphum euphorbiae	2	1	0	Mock_CMV
Macrosiphum euphorbiae	2	0	1	Mock_CMV
Macrosiphum euphorbiae	2	0	1	Mock_CMV
Macrosiphum euphorbiae	2	0	1	Mock_CMV
Macrosiphum euphorbiae	2	1	0	Mock_CMV
Macrosiphum euphorbiae	2	1	0	Mock_CMV
Macrosiphum euphorbiae	2	1	0	Mock_CMV
Macrosiphum euphorbiae	2	1	0	Mock_CMV
Macrosiphum euphorbiae	2	1	0	Mock_CMV
Macrosiphum euphorbiae	2	0	1	Mock_CMV
Macrosiphum euphorbiae	2	0	1	Mock_CMV
Macrosiphum euphorbiae	2	0	1	Mock_CMV
Macrosiphum euphorbiae	2	0	1	Mock_CMV
Macrosiphum euphorbiae	2	1	0	Mock_CMV
Macrosiphum euphorbiae	2	0	1	Mock_CMV
Macrosiphum euphorbiae	2	0	1	Mock_CMV
Macrosiphum euphorbiae	3	1	0	Mock_CMV
Macrosiphum euphorbiae	3	0	1	Mock_CMV
Macrosiphum euphorbiae	3	0	1	Mock_CMV
Macrosiphum euphorbiae	3	0	1	Mock_CMV
Macrosiphum euphorbiae	3	1	0	Mock_CMV
Macrosiphum euphorbiae	3	0	1	Mock_CMV
Macrosiphum euphorbiae	3	0	1	Mock_CMV
Macrosiphum euphorbiae	3	1	0	Mock_CMV
Macrosiphum euphorbiae	3	1	0	Mock_CMV
Macrosiphum euphorbiae	3	0	1	Mock_CMV
Macrosiphum euphorbiae	3	1	0	Mock_CMV
Macrosiphum euphorbiae	3	0	1	Mock_CMV
Macrosiphum euphorbiae	3	0	1	Mock_CMV
Macrosiphum euphorbiae	3	0	1	Mock_CMV
Macrosiphum euphorbiae	3	1	0	Mock_CMV
Macrosiphum euphorbiae	3	1	0	Mock_CMV
Macrosiphum euphorbiae	3	1	0	Mock_CMV
Macrosiphum euphorbiae	3	0	1	Mock_CMV
Macrosiphum euphorbiae	3	0	1	Mock_CMV
Macrosiphum euphorbiae	3	0	1	Mock_CMV
Macrosiphum euphorbiae	3	0	1	Mock_CMV
Macrosiphum euphorbiae	3	0	1	Mock_CMV
Macrosiphum euphorbiae	3	0	1	Mock_CMV
Macrosiphum euphorbiae	3	0	1	Mock_CMV
Macrosiphum euphorbiae	3	0	1	Mock_CMV
Macrosiphum euphorbiae	3	1	0	Mock_CMV
Macrosiphum euphorbiae	3	0	1	Mock_CMV
Macrosiphum euphorbiae	3	1	0	Mock_CMV
Macrosiphum euphorbiae	3	0	1	Mock_CMV
Macrosiphum euphorbiae	3	0	1	Mock_CMV
Macrosiphum euphorbiae	3	0	1	Mock_CMV
Macrosiphum euphorbiae	3	1	0	Mock_CMV
Macrosiphum euphorbiae	3	1	0	Mock_CMV
Macrosiphum euphorbiae	1	1	1	Mock_Mock
Macrosiphum euphorbiae	1	1	0	Mock_Mock
Macrosiphum euphorbiae	1	1	1	Mock_Mock
Macrosiphum euphorbiae	1	0	1	Mock_Mock
Macrosiphum euphorbiae	1	0	1	Mock_Mock
Macrosiphum euphorbiae	1	0	1	Mock_Mock
Macrosiphum euphorbiae	1	0	0	Mock_Mock
Macrosiphum euphorbiae	1	1	0	Mock_Mock
Macrosiphum euphorbiae	1	1	0	Mock_Mock
Macrosiphum euphorbiae	1	2	1	Mock_Mock
Macrosiphum euphorbiae	1	1	0	Mock_Mock
Macrosiphum euphorbiae	1	0	1	Mock_Mock
Macrosiphum euphorbiae	1	0	2	Mock_Mock
Macrosiphum euphorbiae	1	1	1	Mock_Mock
Macrosiphum euphorbiae	1	1	0	Mock_Mock
Macrosiphum euphorbiae	1	1	0	Mock_Mock
Macrosiphum euphorbiae	1	0	1	Mock_Mock
Macrosiphum euphorbiae	1	1	0	Mock_Mock
Macrosiphum euphorbiae	1	1	0	Mock_Mock
Macrosiphum euphorbiae	1	1	0	Mock_Mock
Macrosiphum euphorbiae	1	0	1	Mock_Mock
Macrosiphum euphorbiae	1	0	1	Mock_Mock
Macrosiphum euphorbiae	2	1	1	Mock_Mock
Macrosiphum euphorbiae	2	0	1	Mock_Mock
Macrosiphum euphorbiae	2	1		Mock_Mock
Macrosiphum euphorbiae	2	0	1	Mock_Mock
Macrosiphum euphorbiae	2	1	0	Mock_Mock
Macrosiphum euphorbiae	2	1	0	Mock_Mock
Macrosiphum euphorbiae	2	1	0	Mock_Mock
Macrosiphum euphorbiae	2	0	1	Mock_Mock
Macrosiphum euphorbiae	2	1	0	Mock_Mock
Macrosiphum euphorbiae	2	0	1	Mock_Mock
Macrosiphum euphorbiae	2	1	1	Mock_Mock
Macrosiphum euphorbiae	2	0	1	Mock_Mock
Macrosiphum euphorbiae	2	1	1	Mock_Mock
Macrosiphum euphorbiae	2	1	0	Mock_Mock
Macrosiphum euphorbiae	2	0	1	Mock_Mock
Macrosiphum euphorbiae	2	0	1	Mock_Mock
Macrosiphum euphorbiae	2	0	1	Mock_Mock
Macrosiphum euphorbiae	2	1	0	Mock_Mock
Macrosiphum euphorbiae	2	1	0	Mock_Mock
Macrosiphum euphorbiae	2	0	1	Mock_Mock
Macrosiphum euphorbiae	2	0	1	Mock_Mock
Macrosiphum euphorbiae	2	0	1	Mock_Mock
Macrosiphum euphorbiae	2	1	0	Mock_Mock
Macrosiphum euphorbiae	3	0	1	Mock_Mock
Macrosiphum euphorbiae	3	1	0	Mock_Mock
Macrosiphum euphorbiae	3	1	0	Mock_Mock
Macrosiphum euphorbiae	3	1	0	Mock_Mock
Macrosiphum euphorbiae	3	0	1	Mock_Mock
Macrosiphum euphorbiae	3	1	0	Mock_Mock
Macrosiphum euphorbiae	3	0	1	Mock_Mock
Macrosiphum euphorbiae	3	1	0	Mock_Mock
Macrosiphum euphorbiae	3	0	1	Mock_Mock
Macrosiphum euphorbiae	3	1	0	Mock_Mock
Macrosiphum euphorbiae	3	0	1	Mock_Mock
Macrosiphum euphorbiae	3	0	1	Mock_Mock
Macrosiphum euphorbiae	3	1	0	Mock_Mock
Macrosiphum euphorbiae	3	1	0	Mock_Mock
Macrosiphum euphorbiae	3	1	0	Mock_Mock
Macrosiphum euphorbiae	3	0	1	Mock_Mock
Macrosiphum euphorbiae	3	0	1	Mock_Mock
Macrosiphum euphorbiae	3	0	1	Mock_Mock
Macrosiphum euphorbiae	3	1	0	Mock_Mock
Macrosiphum euphorbiae	3	1	0	Mock_Mock
Macrosiphum euphorbiae	3	1	0	Mock_Mock
Macrosiphum euphorbiae	3	0	1	Mock_Mock
Macrosiphum euphorbiae	3	0	1	Mock_Mock
Macrosiphum euphorbiae	3	1	0	Mock_Mock
Macrosiphum euphorbiae	3	0	1	Mock_Mock
Macrosiphum euphorbiae	3	0	1	Mock_Mock
Macrosiphum euphorbiae	3	0	1	Mock_Mock
Macrosiphum euphorbiae	3	0	1	Mock_Mock

## Sheet: Figure 4A-D 
Volatile organic compounds emitted by tomato plants infected/ inoculated with CMV/water
						Peak areas
	RT	CMV2_D	CMV1_D	CMV3_D	M1_D	M2_D	M3_D	CMV1_L	CMV2_L	CMV3_L	M1_L	M2_L	M3_L
Isopropyl acetate	8.32	2.11147e+08	4.74897e+08	2.81883e+08	7.11858e+07	2.21787e+08	2.2377e+08	3.62325e+08	1.93128e+08	3.86005e+08	3.37092e+08	8.55316e+07	2.17117e+08
α-pinine	8.63	4.97202e+07	8.86901e+07	4.96125e+07	6.36668e+07	8.37533e+07	4.33113e+07	7.98152e+07	5.83048e+07	6.09468e+07	7.59863e+07	6.75218e+07	4.07585e+07
Benzaldehyde	9.05	129260911	1.9846e+08	1.08846e+08	9.01275e+07	1.52767e+08	1.00871e+08	1.65753e+08	1.23359e+08	1.48195e+08	1.64853e+08	1.08188e+08	7.85609e+07
α-Terpine	9.63	1.37627e+08	1.7626e+08	1.36733e+08	6.35679e+07	1.50013e+08	8.62254e+07	9.1953e+07	1.37827e+08	1.59168e+08	1.27811e+08	9.34573e+07	1.27792e+08
p-Cymene	9.94							1.5586e+07	1.76812e+07	1.41953e+07	2.11527e+07	0	0
2-ethyl-1-hexanol	10.01	2.72355e+08	4.01043e+08	2.75796e+08	1.32819e+08	2.92224e+08	1.56033e+08	1.80896e+08	3.16476e+08	2.99308e+08	2.47699e+08	1.98531e+08	3.8401e+08
Nonanal	10.9	2.23931e+08	2.79733e+08	1.98846e+08	7.90542e+07	2.1992e+08	1.01367e+08	1.13895e+08	2.33697e+08	2.46168e+08	1.99824e+08	1.23672e+08	1.76292e+08
Vincamine	11.44	3.18515e+07	6.62311e+07	3.32223e+07	2.7444e+07	4.70877e+07	2.47024e+07	3.38139e+07	4.38656e+07	3.98255e+07	5.71393e+07	3.3994e+07	5.20863e+07
Napthalene	11.82	1.58291e+08	1.80519e+08	1.44546e+08	3.46326e+07	1.40713e+08	6.12633e+07	4.65256e+07	1.83296e+08	1.93626e+08	1.13244e+08	6.32909e+07	59947552
	FW	0.0145	0.017	0.023	0.028	0.0397	0.065	0.018	0.0314	0.0193	0.0261	0.0296	0.0582
	DW	0.0142	0.0165	0.019	0.0254	0.032	0.051	0.017	0.0284	0.0165	0.0245	0.0249	0.0487
Key	FW= Fresh Weight		RT=Rentention Time	CMV_D= CMV-infected plant in the dark		CMV_L= CMV-infected plant in the light			M_D= Mock-innoculated plant in the dark
	DW= Dry Weight			M_L= Mock-inoculated plant in the light
Conversion of mass spectral data from each compound to emission rate
VOC	Treatment	Peak area	Pinene equivalent (ng/µl)	Multiply total volume of extract (*500)	DW (g)	VOC emission in ng/g
Isopropyl acetate	CMV2_D	2.11147e+08	0.422295	295.606	0.0142	20817.4
Isopropyl acetate	CMV1_D	4.74897e+08	0.949795	664.856	0.0165	40294.3
Isopropyl acetate	CMV3_D	2.81883e+08	0.563766	394.636	0.019	20770.3
Isopropyl acetate	CMV1_L	3.62325e+08	0.72465	507.255	0.017	29838.5
Isopropyl acetate	CMV2_L	1.93128e+08	0.386256	270.38	0.0284	9520.41
Isopropyl acetate	CMV3_L	3.86005e+08	0.77201	540.407	0.0165	32751.9
Isopropyl acetate	M1_D	7.11858e+07	0.142372	99.6601	0.0254	3923.63
Isopropyl acetate	M2_D	2.21787e+08	0.443573	310.501	0.032	9703.16
Isopropyl acetate	M3_D	2.2377e+08	0.447539	313.277	0.051	6142.69
Isopropyl acetate	M1_L	3.37092e+08	0.674183	471.928	0.0245	19262.4
Isopropyl acetate	M2_L	8.55316e+07	0.171063	119.744	0.0249	4809.01
Isopropyl acetate	M3_L	2.17117e+08	0.434233	303.963	0.0487	6241.55
α-pinine	CMV2_D	4.97202e+07	0.0994404	69.6083	0.0142	4901.99
α-pinine	CMV1_D	8.86901e+07	0.17738	124.166	0.0165	7525.22
α-pinine	CMV3_D	4.96125e+07	0.0992249	69.4575	0.019	3655.66
α-pinine	CMV1_L	7.98152e+07	0.15963	111.741	0.017	6573.02
α-pinine	CMV2_L	5.83048e+07	0.11661	81.6268	0.0284	2874.18
α-pinine	CMV3_L	6.09468e+07	0.121894	85.3255	0.0165	5171.24
α-pinine	M1_D	6.36668e+07	0.127334	89.1335	0.0254	3509.19
α-pinine	M2_D	8.37533e+07	0.167507	117.255	0.032	3664.2
α-pinine	M3_D	4.33113e+07	0.0866226	60.6358	0.051	1188.94
α-pinine	M1_L	7.59863e+07	0.151973	106.381	0.0245	4342.07
α-pinine	M2_L	6.75218e+07	0.135044	94.5305	0.0249	3796.41
α-pinine	M3_L	4.07585e+07	0.0815169	57.0618	0.0487	1171.7			Data summaries
Benzaldehyde	CMV2_D	129260911	0.258522	180.965	0.0142	12744			Total combined volatiles
Benzaldehyde	CMV1_D	1.9846e+08	0.39692	277.844	0.0165	16839				MEAN		SEM
Benzaldehyde	CMV3_D	1.08846e+08	0.217693	152.385	0.019	8020.27				Light	Dark	LIGHT
Benzaldehyde	CMV1_L	1.65753e+08	0.331505	232.054	0.017	13650.2			CMV	91294.6	119136	19050.1	18677.6
Benzaldehyde	CMV2_L	1.23359e+08	0.246718	172.703	0.0284	6081.09			Mock	49419.8	41096.2	12330.3	9423.85
Benzaldehyde	CMV3_L	1.48195e+08	0.29639	207.473	0.0165	12574.1
Benzaldehyde	M1_D	9.01275e+07	0.180255	126.179	0.0254	4967.66				Reset the plot			SEM
Benzaldehyde	M2_D	1.52767e+08	0.305533	213.873	0.032	6683.54				Mock	Fny-CMV	Mock	Fny-CMV
Benzaldehyde	M3_D	1.00871e+08	0.201741	141.219	0.051	2769			Light	49419.8	91294.6	12330.3	19050.1
Benzaldehyde	M1_L	1.64853e+08	0.329706	230.794	0.0245	9420.18			Dark	41096.2	119136	9423.85	18677.6
Benzaldehyde	M2_L	1.08188e+08	0.216375	151.463	0.0249	6082.83
Benzaldehyde	M3_L	7.85609e+07	0.157122	109.985	0.0487	2258.42
α-Terpine	CMV2_D	1.37627e+08	0.275254	192.678	0.0142	13568.9
α-Terpine	CMV1_D	1.7626e+08	0.35252	246.764	0.0165	14955.4			Total VOC	mean	sem
α-Terpine	CMV3_D	1.36733e+08	0.273466	191.426	0.019	10075.1		CMV2_D_1	116568
α-Terpine	CMV1_L	9.1953e+07	0.183906	128.734	0.017	7572.6		CMV1_D_2	152694
α-Terpine	CMV2_L	1.37827e+08	0.275654	192.958	0.0284	6794.3		CMV3_D_3	88145.6	119136	18677.6
α-Terpine	CMV3_L	1.59168e+08	0.318335	222.835	0.0165	13505.1		CMV1_L_1	85742.8
α-Terpine	M1_D	6.35679e+07	0.127136	88.995	0.0254	3503.74		CMV2_L_2	61426.9
α-Terpine	M2_D	1.50013e+08	0.300026	210.018	0.032	6563.06		CMV3_L_3	126714	91294.6	19050.1
α-Terpine	M3_D	8.62254e+07	0.172451	120.716	0.051	2366.97
α-Terpine	M1_L	1.27811e+08	0.255622	178.936	0.0245	7303.5		M1_D_1	29491.2
α-Terpine	M2_L	9.34573e+07	0.186915	130.84	0.0249	5254.63		M2_D_2	52701.2
α-Terpine	M3_L	1.27792e+08	0.255584	178.909	0.0487	3673.69		M3_D_3	21215.2	41096.2	9423.85
2-ethyl-1-hexanol	CMV2_D	2.72355e+08	0.544711	381.298	0.0142	26851.9		M1_L_1	73580.7
2-ethyl-1-hexanol	CMV1_D	4.01043e+08	0.802086	561.46	0.0165	34027.9		M2_L_2	41617.2
2-ethyl-1-hexanol	CMV3_D	2.75796e+08	0.551592	386.114	0.019	20321.8		M3_L_3	33061.4	49419.8	12330.3
2-ethyl-1-hexanol	CMV1_L	1.80896e+08	0.361793	253.255	0.017	14897.3
2-ethyl-1-hexanol	CMV2_L	3.16476e+08	0.632951	443.066	0.0284	15600.9
2-ethyl-1-hexanol	CMV3_L	2.99308e+08	0.598616	419.031	0.0165	25395.8
2-ethyl-1-hexanol	M1_D	1.32819e+08	0.265638	185.947	0.0254	7320.75
2-ethyl-1-hexanol	M2_D	2.92224e+08	0.584447	409.113	0.032	12784.8
2-ethyl-1-hexanol	M3_D	1.56033e+08	0.312066	218.446	0.051	4283.26
2-ethyl-1-hexanol	M1_L	2.47699e+08	0.495397	346.778	0.0245	14154.2
2-ethyl-1-hexanol	M2_L	1.98531e+08	0.397063	277.944	0.0249	11162.4
2-ethyl-1-hexanol	M3_L	3.8401e+08	0.768021	537.615	0.0487	11039.3
Nonanal	CMV2_D	2.23931e+08	0.447862	313.503	0.0142	22077.7
Nonanal	CMV1_D	2.79733e+08	0.559467	391.627	0.0165	23735
Nonanal	CMV3_D	1.98846e+08	0.397692	278.384	0.019	14651.8
Nonanal	CMV1_L	1.13895e+08	0.22779	159.453	0.017	9379.61
Nonanal	CMV2_L	2.33697e+08	0.467395	327.176	0.0284	11520.3
Nonanal	CMV3_L	2.46168e+08	0.492336	344.635	0.0165	20887
Nonanal	M1_D	7.90542e+07	0.158108	110.676	0.0254	4357.32
Nonanal	M2_D	2.1992e+08	0.439839	307.887	0.032	9621.48
Nonanal	M3_D	1.01367e+08	0.202734	141.914	0.051	2782.63
Nonanal	M1_L	1.99824e+08	0.399648	279.754	0.0245	11418.5
Nonanal	M2_L	1.23672e+08	0.247343	173.14	0.0249	6953.43
Nonanal	M3_L	1.76292e+08	0.352583	246.808	0.0487	5067.93
Vincamine	CMV2_D	3.18515e+07	0.0637029	44.5921	0.0142	3140.29
Vincamine	CMV1_D	6.62311e+07	0.132462	92.7236	0.0165	5619.61
Vincamine	CMV3_D	3.32223e+07	0.0664445	46.5112	0.019	2447.96
Vincamine	CMV1_L	3.38139e+07	0.0676278	47.3394	0.017	2784.67
Vincamine	CMV2_L	4.38656e+07	0.0877312	61.4118	0.0284	2162.39
Vincamine	CMV3_L	3.98255e+07	0.0796511	55.7558	0.0165	3379.14
Vincamine	M1_D	2.7444e+07	0.054888	38.4216	0.0254	1512.66
Vincamine	M2_D	4.70877e+07	0.0941754	65.9228	0.032	2060.09
Vincamine	M3_D	2.47024e+07	0.0494049	34.5834	0.051	678.106
Vincamine	M1_L	5.71393e+07	0.114279	79.995	0.0245	3265.1
Vincamine	M2_L	3.3994e+07	0.0679879	47.5915	0.0249	1911.31						Data summaries
Vincamine	M3_L	5.20863e+07	0.104173	72.9208	0.0487	1497.35								Mean for specific VOC		SEM						Mean		SEM
Napthalene	CMV2_D	1.58291e+08	0.316583	221.608	0.0142	15606.2								Light	Dark	Light	Dark					Mock	Fny-CMV	Mock	Fny-CMV
Napthalene	CMV1_D	1.80519e+08	0.361038	252.726	0.0165	15316.7						Isopropyl acetate	CMV	24037	27294	7306.84	6500.17			Isopropyl acetate	Light	10104.3	24037	4597.67	7306.84
Napthalene	CMV3_D	1.44546e+08	0.289091	202.364	0.019	10650.7							Mock	10104.3	6589.83	4597.67	1683.32				Dark	6589.83	27294	1683.32	6500.17
Napthalene	CMV1_L	4.65256e+07	0.0930512	65.1359	0.017	3831.52						2-ethyl-1-hexanol	CMV	18631.4	27067.2	3388.32	2792.79			2-ethyl-1-hexanol	Light	12118.6	18631.4	1018.4	3388.32
Napthalene	CMV2_L	1.83296e+08	0.366591	256.614	0.0284	9035.7							Mock	12118.6	8129.6	1018.4	2487.28				Dark	8129.6	27067.2	2487.28	2792.79
Napthalene	CMV3_L	1.93626e+08	0.387252	271.077	0.0165	16428.9						Nonanal	CMV	13929	20154.8	3533.47	2792.79			Nonanal	Light	7813.3	13929	1883	3533.47
Napthalene	M1_D	3.46326e+07	0.0692652	48.4856	0.0254	1908.88							Mock	7813.3	5587.14	1883	2067.75				Dark	5587.14	20154.8	2067.75	2792.79
Napthalene	M2_D	1.40713e+08	0.281426	196.998	0.032	6156.2						Naphthalene	CMV	9765.37	13857.9	3654.8	1605.76			Naphthalene	Light	3917.65	9765.37	1382.27	3654.8
Napthalene	M3_D	6.12633e+07	0.122527	85.7686	0.051	1681.74							Mock	3917.65	3248.94	1382.27	1455.11				Dark	3248.94	13857.9	1455.11	1605.76
Napthalene	M1_L	1.13244e+08	0.226488	158.542	0.0245	6471.1						Benzaldehyde	CMV	10768.5	12534.4	2364.19	2547.91			Benzaldehyde	Light	5920.48	10768.5	2069.01	2364.19
Napthalene	M2_L	6.32909e+07	0.126582	88.6072	0.0249	3558.52							Mock	5920.48	4806.73	2069.01	1132.89				Dark	4806.73	12534.4	1132.89	2547.91
Napthalene	M3_L	59947552	0.119895	83.9266	0.0487	1723.34						α-Terpine	CMV	9290.68	12866.4	2119.17	1451.94			α-Terpine	Light	5410.61	9290.68	1050.73	2119.17
p-Cymene	CMV1_L	1.5586e+07	0.0311721	21.8205	0.017	1283.56							Mock	5410.61	4144.59	1050.73	1252.97				Dark	4144.59	12866.4	1252.97	1451.94
p-Cymene	CMV2_L	1.76812e+07	0.0353624	24.7537	0.0284	871.609						α-pinene	CMV	4872.82	5360.96	1078.14	1140.38			α-Pinene	Light	3103.39	4872.82	978.607	1078.14
p-Cymene	CMV3_L	1.41953e+07	0.0283906	19.8734	0.0165	1204.45							Mock	3103.39	2787.45	978.607	800.506				Dark	2787.45	5360.96	800.506	1140.38
p-Cymene	M1_L	2.11527e+07	0.0423053	29.6137	0.0245	1208.72						p-Cymene	CMV	1119.87	0	126.215				ρ-Cymene	Light	402.908	1119.87	402.908	126.215
p-Cymene	M_L	0	0	0	0.0249	0							Mock	402.908		402.908					Dark
p-Cymene	M_L	0	0	0	0.0487	0

## Sheet: Figure S4
Settling Assays with tomato plants infected with LSCMV
						Data summary: Myzus persicae
Aphid species	Treatment: Mock verus LSCMV (L1L2L3 )								Left	Right	SEM
Myzus persicae	Exp	Time_hrs	Mock	LSCMV		Exp1	MockVMock	1hr	-47.6744	52.3256	1.1004	0.996593
	1	1	3	5				24hr	-45.7143	54.2857	0.649437	1.15175
	1	1	9	1			FnyVM	1hr	-56.3218	43.6782	1.74574	0.895947
	1	1	5	11				24hr	-49.3506	50.6494	0.782461	0.868966
	1	1	6	5		Expt2	MockVMock	1hr	-55.7522	44.2478	1.60357	1.22336
	1	1	8	7				24hr	-37.8641	62.1359	0.611678	0.884485
	1	1	3	15			FnyVM	1hr	-46.3415	53.6585	1.44514	2.08982
	1	1	4	5				24hr	-49.2063	50.7937	1.06586	1.15175
			38	49		Expt3	MockVMock	1hr	-42.1053	57.8947	1.21218	0.993174
	2	1	3	5				24hr	-42.5743	57.4257	0.857143	1.04002
	2	1	2	4			FnyVM	1hr	-41.3793	58.6207	1.41421	2.15473
	2	1	15	3				24hr	-41.3534	59.3985	1.34214	1.56339
	2	1	6	5
	2	1	1	7
	2	1	4	13
	2	1	13	1
			44	38
	3	1	9	1
	3	1	3	2
	3	1	0	12
	3	1	13	8
	3	1	7	5
	3	1	12	11
	3	1	5	5
	3	1	19	4
			68	48
	1	24	9	3
	1	24	4	4
	1	24	5	6
	1	24	7	5
	1	24	7	7
	1	24	2	9
	1	24	5	4
			39	38
	2	24	2	6
	2	24	1	5
	2	24	7	1
	2	24	8	5
	2	24	2	7
	2	24	4	7
	2	24	8	0
			32	31
	3	24	12	4
	3	24	4	6
	3	24	4	9
	3	24	12	10
	3	24	9	4
	3	24	16	14
	3	24	8	3
	3	24	14	5
			79	55
	Treatment: Mock versus Mock
	experiment	Time_hrs	Mock1	Mock2
	1	1	8	4
	1	1	2	10
	1	1	3	7
	1	1	5	5
	1	1	8	10
	1	1	5	5
	1	1	10	4
			41	45
	2	1	17	3
	2	1	8	9
	2	1	9	5
	2	1	4	6
	2	1	5	12
	2	1	10	10
	2	1	10	5
			63	50
	3	1	5	5
	3	1	0	6
	3	1	6	12
	3	1	1	6
	3	1	4	5
	3	1	9	4
	3	1	7	6
			32	44
	1	24	2	6
	1	24	5	1
	1	24	3	3
	1	24	6	6
	1	24	7	10
	1	24	5	8
	1	24	4	4
			32	38
	2	24	6	8
	2	24	8	10
	2	24	4	7
	2	24	4	14
	2	24	4	9
	2	24	7	8
	2	24	6	8
			39	64
	3	24	6	6
	3	24	8	14
	3	24	3	9
	3	24	5	6
	3	24	4	7
	3	24	9	8
	3	24	8	8
			43	58
						Data summary : Macrosiphum euphorbaie
Macrosiphum euphorbiae	Treatment: Mock verus LSCMV (L1L2L3 )										SEM
		Time_hrs	Mock	LSCMV		Experiment			Left	Right
	1	1	12	0		1	MvM	1hr	-52.9412	47.0588	2.51661	2.33333
	1	1	2	8				24hrs	-47.8261	52.1739	1.85592	2.08167
	1	1	4	5			FvM	1hr	-39.6226	59.6154	1.53623	1.42829
	1	1	2	6				24hrs	-45.098	54.902	1.53623	1.53623
	1	1	11	2		2	MvM	1hr	-42.8571	57.1429	0.916515	1.36382
			31	21				24hrs	-58.8235	41.1765	1.04881	1.16619
	2	1	2	10			FvM	1hr	-57.1429	42.8571	1.1225	1.39284
	2	1	6	7				24hrs	-42.8571	57.1429	0.583095	1.16619
	2	1	8	3		3	MvM	1hr	-58.9286	41.0714	1.28841	1.43527
	2	1	7	6				24hrs	-55.2239	49.2537	1.32665	1.50333
	2	1	1	6			FvM	1hr	-52.0548	47.9452	1.80555	1.64317
			24	32				24hrs	-54.6875	45.3125	0.707107	0.374166
	3	1	6	8
	3	1	13	2
	3	1	6	6
	3	1	7	9
	3	1	3	13
			35	38
	1	24	9	0
	1	24	3	8
	1	24	7	8
	1	24	1	4
	1	24	8	3
			28	23
	2	24	5	6
	2	24	6	5
	2	24	11	4
	2	24	5	3
	2	24	5	6
			32	24
	3	24	7	8
	3	24	6	5
	3	24	5	6
	3	24	5	9
	3	24	6	7
	3	24	29	35
	Treatment: Mock versus Mock
	experiment	Time_hrs	Mock1	Mock2
	1	1	1	10
	1	1	9	3
	1	1	8	3
			18	16
	2	1	3	10
	2	1	7	6
	2	1	7	4
	2	1	4	3
	2	1	3	9
			24	32
	3	1	4	2
	3	1	8	1
	3	1	5	9
	3	1	5	5
	3	1	11	6
			33	23
	1	24	0	7
	1	24	6	0
	1	24	5	5
			11	12
	2	24	5	10
	2	24	10	5
	2	24	10	3
	2	24	6	5
	2	24	9	5
			40	28
	3	24	7	5
	3	24	12	3
	3	24	8	6
	3	24	4	7
	3	24	6	12
			37	33

## Sheet: Figure 5
vector	experiment	time	A	B	A_B
Myzus persicae	1	1	7	9	Mock_FLL
Myzus persicae	1	1	12	1	Mock_FLL
Myzus persicae	1	1	12	2	Mock_FLL
Myzus persicae	1	1	1	11	Mock_FLL
Myzus persicae	1	1	1	13	Mock_FLL
Myzus persicae	2	1	12	0	Mock_FLL
Myzus persicae	2	1	6	5	Mock_FLL
Myzus persicae	2	1	8	0	Mock_FLL
Myzus persicae	2	1	5	8	Mock_FLL
Myzus persicae	2	1	7	7	Mock_FLL
Myzus persicae	2	1	6	13	Mock_FLL
Myzus persicae	2	1	8	1	Mock_FLL
Myzus persicae	2	1	13	1	Mock_FLL
Myzus persicae	2	1	4	6	Mock_FLL
Myzus persicae	3	1	7	9	Mock_FLL
Myzus persicae	3	1	10	2	Mock_FLL
Myzus persicae	3	1	9	5	Mock_FLL
Myzus persicae	3	1	11	4	Mock_FLL
Myzus persicae	3	1	17	0	Mock_FLL
Myzus persicae	3	1	7	6	Mock_FLL
Myzus persicae	3	1	7	0	Mock_FLL
Myzus persicae	3	1	10	1	Mock_FLL
Myzus persicae	3	1	13	4	Mock_FLL
Myzus persicae	4	1	1	3	Mock_FLL
Myzus persicae	4	1	3	8	Mock_FLL
Myzus persicae	4	1	5	7	Mock_FLL
Myzus persicae	4	1	4	1	Mock_FLL
Myzus persicae	4	1	5	1	Mock_FLL
Myzus persicae	4	1	6	11	Mock_FLL
Myzus persicae	4	1	2	11	Mock_FLL
Myzus persicae	4	1	5	6	Mock_FLL
Myzus persicae	4	1	1	7	Mock_FLL
Myzus persicae	1	24	5	8	Mock_FLL
Myzus persicae	1	24	14	1	Mock_FLL
Myzus persicae	1	24	12	2	Mock_FLL
Myzus persicae	1	24	2	10	Mock_FLL
Myzus persicae	1	24	7	4	Mock_FLL
Myzus persicae	2	24	9	4	Mock_FLL
Myzus persicae	2	24	4	3	Mock_FLL
Myzus persicae	2	24	11	1	Mock_FLL
Myzus persicae	2	24	5	11	Mock_FLL
Myzus persicae	2	24	6	4	Mock_FLL
Myzus persicae	2	24	8	8	Mock_FLL
Myzus persicae	2	24	8	2	Mock_FLL
Myzus persicae	2	24	7	1	Mock_FLL
Myzus persicae	2	24	4	9	Mock_FLL
Myzus persicae	3	24	10	5	Mock_FLL
Myzus persicae	3	24	2	1	Mock_FLL
Myzus persicae	3	24	1	6	Mock_FLL
Myzus persicae	3	24	5	4	Mock_FLL
Myzus persicae	3	24	15	2	Mock_FLL
Myzus persicae	3	24	6	8	Mock_FLL
Myzus persicae	3	24	3	3	Mock_FLL
Myzus persicae	3	24	5	8	Mock_FLL
Myzus persicae	3	24	5	6	Mock_FLL
Myzus persicae	4	24	3	8	Mock_FLL
Myzus persicae	4	24	5	6	Mock_FLL
Myzus persicae	4	24	8	4	Mock_FLL
Myzus persicae	4	24	4	3	Mock_FLL
Myzus persicae	4	24	10	2	Mock_FLL
Myzus persicae	4	24	5	7	Mock_FLL
Myzus persicae	4	24	11	3	Mock_FLL
Myzus persicae	4	24	10	7	Mock_FLL
Myzus persicae	4	24	2	6	Mock_FLL
Myzus persicae	1	1	11	1	Mock_LFL
Myzus persicae	1	1	15	0	Mock_LFL
Myzus persicae	1	1	11	3	Mock_LFL
Myzus persicae	1	1	13	4	Mock_LFL
Myzus persicae	1	1	8	3	Mock_LFL
Myzus persicae	2	1	9	4	Mock_LFL
Myzus persicae	2	1	6	3	Mock_LFL
Myzus persicae	2	1	13	2	Mock_LFL
Myzus persicae	2	1	5	1	Mock_LFL
Myzus persicae	2	1	9	2	Mock_LFL
Myzus persicae	2	1	2	11	Mock_LFL
Myzus persicae	2	1	4	6	Mock_LFL
Myzus persicae	2	1	8	4	Mock_LFL
Myzus persicae	2	1	20	0	Mock_LFL
Myzus persicae	3	1	7	4	Mock_LFL
Myzus persicae	3	1	10	7	Mock_LFL
Myzus persicae	3	1	10	3	Mock_LFL
Myzus persicae	3	1	5	2	Mock_LFL
Myzus persicae	3	1	5	5	Mock_LFL
Myzus persicae	3	1	9	0	Mock_LFL
Myzus persicae	3	1	11	2	Mock_LFL
Myzus persicae	3	1	4	2	Mock_LFL
Myzus persicae	3	1	4	1	Mock_LFL
Myzus persicae	4	1	5	2	Mock_LFL
Myzus persicae	4	1	7	4	Mock_LFL
Myzus persicae	4	1	1	7	Mock_LFL
Myzus persicae	4	1	10	1	Mock_LFL
Myzus persicae	4	1	10	1	Mock_LFL
Myzus persicae	4	1	7	5	Mock_LFL
Myzus persicae	4	1	2	6	Mock_LFL
Myzus persicae	4	1	1	6	Mock_LFL
Myzus persicae	4	1	10	5	Mock_LFL
Myzus persicae	4	1	8	1	Mock_LFL
Myzus persicae	4	1	8	1	Mock_LFL
Myzus persicae	4	1	18	0	Mock_LFL
Myzus persicae	1	24	10	3	Mock_LFL
Myzus persicae	1	24	9	0	Mock_LFL
Myzus persicae	1	24	10	0	Mock_LFL
Myzus persicae	1	24	9	7	Mock_LFL
Myzus persicae	2	24	7	3	Mock_LFL
Myzus persicae	2	24	8	1	Mock_LFL
Myzus persicae	2	24	8	4	Mock_LFL
Myzus persicae	2	24	10	5	Mock_LFL
Myzus persicae	2	24	11	4	Mock_LFL
Myzus persicae	2	24	13	3	Mock_LFL
Myzus persicae	2	24	6	8	Mock_LFL
Myzus persicae	2	24	4	5	Mock_LFL
Myzus persicae	2	24	6	2	Mock_LFL
Myzus persicae	2	24	8	5	Mock_LFL
Myzus persicae	3	24	9	2	Mock_LFL
Myzus persicae	3	24	9	2	Mock_LFL
Myzus persicae	3	24	7	0	Mock_LFL
Myzus persicae	3	24	3	5	Mock_LFL
Myzus persicae	3	24	6	0	Mock_LFL
Myzus persicae	3	24	8	0	Mock_LFL
Myzus persicae	3	24	11	2	Mock_LFL
Myzus persicae	3	24	1	6	Mock_LFL
Myzus persicae	3	24	7	6	Mock_LFL
Myzus persicae	4	24	6	5	Mock_LFL
Myzus persicae	4	24	11	2	Mock_LFL
Myzus persicae	4	24	3	5	Mock_LFL
Myzus persicae	4	24	12	4	Mock_LFL
Myzus persicae	4	24	6	8	Mock_LFL
Myzus persicae	4	24	8	4	Mock_LFL
Myzus persicae	4	24	9	7	Mock_LFL
Myzus persicae	4	24	2	9	Mock_LFL
Myzus persicae	4	24	7	6	Mock_LFL
Myzus persicae	4	24	12	1	Mock_LFL
Myzus persicae	4	24	12	2	Mock_LFL
Myzus persicae	4	24	11	1	Mock_LFL
Myzus persicae	1	1	7	5	Mock_FFL
Myzus persicae	1	1	7	4	Mock_FFL
Myzus persicae	1	1	15	0	Mock_FFL
Myzus persicae	1	1	15	1	Mock_FFL
Myzus persicae	1	1	14	2	Mock_FFL
Myzus persicae	1	1	18	0	Mock_FFL
Myzus persicae	2	1	10	0	Mock_FFL
Myzus persicae	2	1	13	2	Mock_FFL
Myzus persicae	2	1	5	3	Mock_FFL
Myzus persicae	2	1	8	2	Mock_FFL
Myzus persicae	2	1	10	2	Mock_FFL
Myzus persicae	2	1	8	5	Mock_FFL
Myzus persicae	2	1	14	1	Mock_FFL
Myzus persicae	3	1	9	1	Mock_FFL
Myzus persicae	3	1	10	1	Mock_FFL
Myzus persicae	3	1	13	0	Mock_FFL
Myzus persicae	3	1	15	2	Mock_FFL
Myzus persicae	3	1	9	5	Mock_FFL
Myzus persicae	1	24	10	0	Mock_FFL
Myzus persicae	1	24	17	0	Mock_FFL
Myzus persicae	1	24	12	0	Mock_FFL
Myzus persicae	1	24	9	2	Mock_FFL
Myzus persicae	1	24	9	5	Mock_FFL
Myzus persicae	1	24	13	1	Mock_FFL
Myzus persicae	2	24	6	8	Mock_FFL
Myzus persicae	2	24	15	2	Mock_FFL
Myzus persicae	2	24	8	6	Mock_FFL
Myzus persicae	2	24	12	1	Mock_FFL
Myzus persicae	2	24	13	1	Mock_FFL
Myzus persicae	2	24	1	5	Mock_FFL
Myzus persicae	2	24	11	0	Mock_FFL
Myzus persicae	3	24	9	2	Mock_FFL
Myzus persicae	3	24	10	4	Mock_FFL
Myzus persicae	3	24	7	3	Mock_FFL
Myzus persicae	3	24	14	2	Mock_FFL
Myzus persicae	3	24	14	1	Mock_FFL
Myzus persicae	1	1	1	2	Mock_LFF
Myzus persicae	1	1	7	0	Mock_LFF
Myzus persicae	1	1	8	4	Mock_LFF
Myzus persicae	1	1	5	6	Mock_LFF
Myzus persicae	1	1	1	6	Mock_LFF
Myzus persicae	1	1	2	6	Mock_LFF
Myzus persicae	1	1	1	4	Mock_LFF
Myzus persicae	2	1	0	1	Mock_LFF
Myzus persicae	2	1	1	0	Mock_LFF
Myzus persicae	2	1	1	0	Mock_LFF
Myzus persicae	2	1	5	1	Mock_LFF
Myzus persicae	2	1	1	2	Mock_LFF
Myzus persicae	2	1	7	0	Mock_LFF
Myzus persicae	2	1	8	4	Mock_LFF
Myzus persicae	2	1	2	6	Mock_LFF
Myzus persicae	2	1	1	4	Mock_LFF
Myzus persicae	3	1	5	11	Mock_LFF
Myzus persicae	3	1	4	9	Mock_LFF
Myzus persicae	3	1	10	5	Mock_LFF
Myzus persicae	3	1	14	3	Mock_LFF
Myzus persicae	3	1	1	9	Mock_LFF
Myzus persicae	3	1	12	0	Mock_LFF
Myzus persicae	3	1	2	12	Mock_LFF
Myzus persicae	1	24	4	7	Mock_LFF
Myzus persicae	1	24	7	1	Mock_LFF
Myzus persicae	1	24	3	2	Mock_LFF
Myzus persicae	1	24	4	6	Mock_LFF
Myzus persicae	1	24	4	4	Mock_LFF
Myzus persicae	1	24	6	3	Mock_LFF
Myzus persicae	1	24	4	7	Mock_LFF
Myzus persicae	1	24	1	4	Mock_LFF
Myzus persicae	1	24	5	3	Mock_LFF
Myzus persicae	2	24	4	7	Mock_LFF
Myzus persicae	2	24	7	1	Mock_LFF
Myzus persicae	2	24	3	2	Mock_LFF
Myzus persicae	2	24	4	6	Mock_LFF
Myzus persicae	2	24	4	4	Mock_LFF
Myzus persicae	2	24	6	3	Mock_LFF
Myzus persicae	2	24	4	7	Mock_LFF
Myzus persicae	2	24	1	4	Mock_LFF
Myzus persicae	2	24	5	3	Mock_LFF
Myzus persicae	3	24	4	12	Mock_LFF
Myzus persicae	3	24	7	9	Mock_LFF
Myzus persicae	3	24	8	9	Mock_LFF
Myzus persicae	3	24	11	6	Mock_LFF
Myzus persicae	3	24	6	9	Mock_LFF
Myzus persicae	3	24	10	3	Mock_LFF
Myzus persicae	3	24	9	7	Mock_LFF
Myzus persicae	1	1	12	3	Mock_FLF
Myzus persicae	1	1	2	8	Mock_FLF
Myzus persicae	1	1	5	6	Mock_FLF
Myzus persicae	1	1	14	0	Mock_FLF
Myzus persicae	1	1	1	13	Mock_FLF
Myzus persicae	1	1	5	1	Mock_FLF
Myzus persicae	1	1	14	1	Mock_FLF
Myzus persicae	1	1	2	11	Mock_FLF
Myzus persicae	2	1	12	1	Mock_FLF
Myzus persicae	2	1	5	12	Mock_FLF
Myzus persicae	2	1	0	12	Mock_FLF
Myzus persicae	2	1	3	6	Mock_FLF
Myzus persicae	2	1	8	1	Mock_FLF
Myzus persicae	2	1	11	0	Mock_FLF
Myzus persicae	2	1	0	10	Mock_FLF
Myzus persicae	2	1	4	6	Mock_FLF
Myzus persicae	3	1	3	10	Mock_FLF
Myzus persicae	3	1	1	13	Mock_FLF
Myzus persicae	3	1	16	0	Mock_FLF
Myzus persicae	3	1	5	8	Mock_FLF
Myzus persicae	3	1	8	0	Mock_FLF
Myzus persicae	3	1	10	0	Mock_FLF
Myzus persicae	3	1	6	4	Mock_FLF
Myzus persicae	3	1	6	3	Mock_FLF
Myzus persicae	1	24	11	3	Mock_FLF
Myzus persicae	1	24	6	10	Mock_FLF
Myzus persicae	1	24	8	6	Mock_FLF
Myzus persicae	1	24	13	2	Mock_FLF
Myzus persicae	1	24	2	8	Mock_FLF
Myzus persicae	1	24	6	5	Mock_FLF
Myzus persicae	1	24	4	8	Mock_FLF
Myzus persicae	1	24	1	7	Mock_FLF
Myzus persicae	2	24	10	1	Mock_FLF
Myzus persicae	2	24	7	8	Mock_FLF
Myzus persicae	2	24	3	9	Mock_FLF
Myzus persicae	2	24	5	7	Mock_FLF
Myzus persicae	2	24	5	2	Mock_FLF
Myzus persicae	2	24	9	3	Mock_FLF
Myzus persicae	2	24	7	6	Mock_FLF
Myzus persicae	2	24	5	4	Mock_FLF
Myzus persicae	3	24	3	11	Mock_FLF
Myzus persicae	3	24	1	8	Mock_FLF
Myzus persicae	3	24	6	1	Mock_FLF
Myzus persicae	3	24	8	7	Mock_FLF
Myzus persicae	3	24	8	3	Mock_FLF
Myzus persicae	3	24	10	3	Mock_FLF
Myzus persicae	3	24	6	10	Mock_FLF
Myzus persicae	3	24	9	5	Mock_FLF
Myzus persicae	1	1	1	9	Mock_LLF
Myzus persicae	1	1	15	0	Mock_LLF
Myzus persicae	1	1	3	12	Mock_LLF
Myzus persicae	1	1	3	12	Mock_LLF
Myzus persicae	1	1	15	0	Mock_LLF
Myzus persicae	1	1	6	7	Mock_LLF
Myzus persicae	2	1	1	11	Mock_LLF
Myzus persicae	2	1	3	7	Mock_LLF
Myzus persicae	2	1	0	0	Mock_LLF
Myzus persicae	2	1	2	0	Mock_LLF
Myzus persicae	2	1	10	4	Mock_LLF
Myzus persicae	3	1	11	0	Mock_LLF
Myzus persicae	3	1	9	2	Mock_LLF
Myzus persicae	3	1	7	7	Mock_LLF
Myzus persicae	3	1	6	6	Mock_LLF
Myzus persicae	3	1	2	11	Mock_LLF
Myzus persicae	1	24	9	4	Mock_LLF
Myzus persicae	1	24	8	2	Mock_LLF
Myzus persicae	1	24	3	11	Mock_LLF
Myzus persicae	1	24	4	12	Mock_LLF
Myzus persicae	1	24	13	3	Mock_LLF
Myzus persicae	1	24	5	6	Mock_LLF
Myzus persicae	2	24	7	10	Mock_LLF
Myzus persicae	2	24	4	7	Mock_LLF
Myzus persicae	2	24	5	7	Mock_LLF
Myzus persicae	2	24	3	4	Mock_LLF
Myzus persicae	2	24	4	6	Mock_LLF
Myzus persicae	3	24	10	1	Mock_LLF
Myzus persicae	3	24	11	4	Mock_LLF
Myzus persicae	3	24	6	7	Mock_LLF
Myzus persicae	3	24	8	4	Mock_LLF
Myzus persicae	3	24	1	12	Mock_LLF
Myzus persicae	1	1	7	0	Mock_CMV
Myzus persicae	1	1	13	0	Mock_CMV
Myzus persicae	1	1	2	3	Mock_CMV
Myzus persicae	1	1	6	3	Mock_CMV
Myzus persicae	1	1	11	1	Mock_CMV
Myzus persicae	2	1	10	5	Mock_CMV
Myzus persicae	2	1	10	2	Mock_CMV
Myzus persicae	2	1	17	2	Mock_CMV
Myzus persicae	2	1	7	0	Mock_CMV
Myzus persicae	2	1	6	7	Mock_CMV
Myzus persicae	3	1	11	4	Mock_CMV
Myzus persicae	3	1	10	2	Mock_CMV
Myzus persicae	3	1	7	1	Mock_CMV
Myzus persicae	3	1	11	1	Mock_CMV
Myzus persicae	3	1	14	2	Mock_CMV
Myzus persicae	3	1	10	0	Mock_CMV
Myzus persicae	4	1	5	0	Mock_CMV
Myzus persicae	4	1	13	2	Mock_CMV
Myzus persicae	4	1	10	0	Mock_CMV
Myzus persicae	4	1	6	3	Mock_CMV
Myzus persicae	4	1	10	1	Mock_CMV
Myzus persicae	4	1	5	4	Mock_CMV
Myzus persicae	1	24	15	0	Mock_CMV
Myzus persicae	1	24	9	1	Mock_CMV
Myzus persicae	1	24	2	1	Mock_CMV
Myzus persicae	1	24	6	3	Mock_CMV
Myzus persicae	1	24	8	3	Mock_CMV
Myzus persicae	2	24	5	3	Mock_CMV
Myzus persicae	2	24	13	2	Mock_CMV
Myzus persicae	2	24	6	6	Mock_CMV
Myzus persicae	2	24	9	0	Mock_CMV
Myzus persicae	2	24	8	5	Mock_CMV
Myzus persicae	3	24	5	0	Mock_CMV
Myzus persicae	3	24	11	1	Mock_CMV
Myzus persicae	3	24	6	2	Mock_CMV
Myzus persicae	3	24	8	2	Mock_CMV
Myzus persicae	3	24	12	0	Mock_CMV
Myzus persicae	3	24	6	1	Mock_CMV
Myzus persicae	4	24	7	2	Mock_CMV
Myzus persicae	4	24	10	2	Mock_CMV
Myzus persicae	4	24	12	0	Mock_CMV
Myzus persicae	4	24	8	2	Mock_CMV
Myzus persicae	4	24	11	1	Mock_CMV
Myzus persicae	4	24	5	0	Mock_CMV
Myzus persicae	1	1	8	6	Mock_CMV
Myzus persicae	1	1	3	6	Mock_CMV
Myzus persicae	1	1	4	0	Mock_CMV
Myzus persicae	1	1	8	5	Mock_CMV
Myzus persicae	1	1	4	3	Mock_CMV
Myzus persicae	1	1	13	0	Mock_CMV
Myzus persicae	2	1	10	0	Mock_CMV
Myzus persicae	2	1	15	0	Mock_CMV
Myzus persicae	2	1	1	10	Mock_CMV
Myzus persicae	2	1	8	0	Mock_CMV
Myzus persicae	2	1	4	5	Mock_CMV
Myzus persicae	3	1	13	2	Mock_CMV
Myzus persicae	3	1	7	4	Mock_CMV
Myzus persicae	3	1	14	0	Mock_CMV
Myzus persicae	3	1	1	3	Mock_CMV
Myzus persicae	3	1	9	2	Mock_CMV
Myzus persicae	3	1	12	1	Mock_CMV
Myzus persicae	1	24	9	3	Mock_CMV
Myzus persicae	1	24	10	3	Mock_CMV
Myzus persicae	1	24	6	1	Mock_CMV
Myzus persicae	1	24	8	2	Mock_CMV
Myzus persicae	1	24	7	2	Mock_CMV
Myzus persicae	1	24	9	3	Mock_CMV
Myzus persicae	2	24	12	0	Mock_CMV
Myzus persicae	2	24	10	1	Mock_CMV
Myzus persicae	2	24	3	3	Mock_CMV
Myzus persicae	2	24	7	2	Mock_CMV
Myzus persicae	2	24	6	3	Mock_CMV
Myzus persicae	3	24	13	1	Mock_CMV
Myzus persicae	3	24	6	3	Mock_CMV
Myzus persicae	3	24	11	0	Mock_CMV
Myzus persicae	3	24	5	4	Mock_CMV
Myzus persicae	3	24	7	1	Mock_CMV
Myzus persicae	3	24	10	2	Mock_CMV
Myzus persicae	1	1	8	5	Mock_LSCMV
Myzus persicae	1	1	4	3	Mock_LSCMV
Myzus persicae	1	1	1	11	Mock_LSCMV
Myzus persicae	1	1	14	1	Mock_LSCMV
Myzus persicae	1	1	7	3	Mock_LSCMV
Myzus persicae	2	1	7	7	Mock_LSCMV
Myzus persicae	2	1	11	8	Mock_LSCMV
Myzus persicae	2	1	13	2	Mock_LSCMV
Myzus persicae	2	1	4	8	Mock_LSCMV
Myzus persicae	2	1	10	4	Mock_LSCMV
Myzus persicae	3	1	5	9	Mock_LSCMV
Myzus persicae	3	1	9	8	Mock_LSCMV
Myzus persicae	3	1	10	4	Mock_LSCMV
Myzus persicae	3	1	1	19	Mock_LSCMV
Myzus persicae	3	1	10	3	Mock_LSCMV
Myzus persicae	4	1	11	2	Mock_LSCMV
Myzus persicae	4	1	4	9	Mock_LSCMV
Myzus persicae	4	1	5	2	Mock_LSCMV
Myzus persicae	4	1	1	15	Mock_LSCMV
Myzus persicae	4	1	6	5	Mock_LSCMV
Myzus persicae	1	24	12	2	Mock_LSCMV
Myzus persicae	1	24	9	7	Mock_LSCMV
Myzus persicae	1	24	5	7	Mock_LSCMV
Myzus persicae	1	24	6	2	Mock_LSCMV
Myzus persicae	1	24	5	4	Mock_LSCMV
Myzus persicae	2	24	5	5	Mock_LSCMV
Myzus persicae	2	24	9	9	Mock_LSCMV
Myzus persicae	2	24	9	1	Mock_LSCMV
Myzus persicae	2	24	3	7	Mock_LSCMV
Myzus persicae	2	24	7	2	Mock_LSCMV
Myzus persicae	3	24	4	10	Mock_LSCMV
Myzus persicae	3	24	7	2	Mock_LSCMV
Myzus persicae	3	24	4	7	Mock_LSCMV
Myzus persicae	3	24	4	9	Mock_LSCMV
Myzus persicae	3	24	3	2	Mock_LSCMV
Myzus persicae	4	24	4	3	Mock_LSCMV
Myzus persicae	4	24	8	10	Mock_LSCMV
Myzus persicae	4	24	13	1	Mock_LSCMV
Myzus persicae	4	24	6	8	Mock_LSCMV
Myzus persicae	4	24	9	3	Mock_LSCMV
Myzus persicae	1	1	0	15	Mock_LSCMV
Myzus persicae	1	1	12	0	Mock_LSCMV
Myzus persicae	1	1	6	5	Mock_LSCMV
Myzus persicae	1	1	1	9	Mock_LSCMV
Myzus persicae	1	1	5	3	Mock_LSCMV
Myzus persicae	1	1	2	3	Mock_LSCMV
Myzus persicae	2	1	4	12	Mock_LSCMV
Myzus persicae	2	1	6	2	Mock_LSCMV
Myzus persicae	2	1	9	4	Mock_LSCMV
Myzus persicae	2	1	12	4	Mock_LSCMV
Myzus persicae	2	1	6	7	Mock_LSCMV
Myzus persicae	2	1	8	6	Mock_LSCMV
Myzus persicae	3	1	6	8	Mock_LSCMV
Myzus persicae	3	1	10	5	Mock_LSCMV
Myzus persicae	3	1	9	5	Mock_LSCMV
Myzus persicae	3	1	8	4	Mock_LSCMV
Myzus persicae	3	1	9	7	Mock_LSCMV
Myzus persicae	1	24	3	11	Mock_LSCMV
Myzus persicae	1	24	13	2	Mock_LSCMV
Myzus persicae	1	24	4	8	Mock_LSCMV
Myzus persicae	1	24	1	8	Mock_LSCMV
Myzus persicae	1	24	10	2	Mock_LSCMV
Myzus persicae	1	24	7	3	Mock_LSCMV
Myzus persicae	2	24	1	6	Mock_LSCMV
Myzus persicae	2	24	7	5	Mock_LSCMV
Myzus persicae	2	24	5	1	Mock_LSCMV
Myzus persicae	2	24	9	3	Mock_LSCMV
Myzus persicae	2	24	7	5	Mock_LSCMV
Myzus persicae	2	24	4	5	Mock_LSCMV
Myzus persicae	3	24	8	8	Mock_LSCMV
Myzus persicae	3	24	5	5	Mock_LSCMV
Myzus persicae	3	24	6	7	Mock_LSCMV
Myzus persicae	3	24	5	5	Mock_LSCMV
Myzus persicae	3	24	5	9	Mock_LSCMV
Myzus persicae	1	1	0	13	Mock_Mock
Myzus persicae	1	1	2	3	Mock_Mock
Myzus persicae	1	1	13	1	Mock_Mock
Myzus persicae	1	1	2	3	Mock_Mock
Myzus persicae	1	1	3	9	Mock_Mock
Myzus persicae	2	1	2	9	Mock_Mock
Myzus persicae	2	1	7	5	Mock_Mock
Myzus persicae	2	1	5	3	Mock_Mock
Myzus persicae	2	1	9	4	Mock_Mock
Myzus persicae	2	1	11	3	Mock_Mock
Myzus persicae	3	1	12	2	Mock_Mock
Myzus persicae	3	1	7	5	Mock_Mock
Myzus persicae	3	1	4	11	Mock_Mock
Myzus persicae	3	1	4	6	Mock_Mock
Myzus persicae	3	1	12	2	Mock_Mock
Myzus persicae	4	1	8	0	Mock_Mock
Myzus persicae	4	1	2	5	Mock_Mock
Myzus persicae	4	1	5	2	Mock_Mock
Myzus persicae	4	1	1	11	Mock_Mock
Myzus persicae	4	1	2	3	Mock_Mock
Myzus persicae	4	1	12	2	Mock_Mock
Myzus persicae	4	1	1	9	Mock_Mock
Myzus persicae	1	24	4	6	Mock_Mock
Myzus persicae	1	24	2	6	Mock_Mock
Myzus persicae	1	24	10	1	Mock_Mock
Myzus persicae	1	24	3	6	Mock_Mock
Myzus persicae	1	24	2	10	Mock_Mock
Myzus persicae	2	24	4	8	Mock_Mock
Myzus persicae	2	24	5	5	Mock_Mock
Myzus persicae	2	24	7	3	Mock_Mock
Myzus persicae	2	24	9	8	Mock_Mock
Myzus persicae	2	24	7	7	Mock_Mock
Myzus persicae	3	24	4	6	Mock_Mock
Myzus persicae	3	24	0	4	Mock_Mock
Myzus persicae	3	24	2	8	Mock_Mock
Myzus persicae	3	24	1	6	Mock_Mock
Myzus persicae	3	24	9	3	Mock_Mock
Myzus persicae	4	24	3	7	Mock_Mock
Myzus persicae	4	24	6	6	Mock_Mock
Myzus persicae	4	24	8	8	Mock_Mock
Myzus persicae	4	24	0	15	Mock_Mock
Myzus persicae	4	24	8	4	Mock_Mock
Myzus persicae	4	24	9	3	Mock_Mock
Myzus persicae	4	24	5	7	Mock_Mock
Myzus persicae	1	1	6	3	Mock_Mock
Myzus persicae	1	1	1	7	Mock_Mock
Myzus persicae	1	1	7	1	Mock_Mock
Myzus persicae	1	1	7	4	Mock_Mock
Myzus persicae	1	1	5	6	Mock_Mock
Myzus persicae	2	1	5	4	Mock_Mock
Myzus persicae	2	1	2	2	Mock_Mock
Myzus persicae	2	1	2	6	Mock_Mock
Myzus persicae	2	1	6	2	Mock_Mock
Myzus persicae	2	1	1	1	Mock_Mock
Myzus persicae	3	1	12	2	Mock_Mock
Myzus persicae	3	1	14	0	Mock_Mock
Myzus persicae	3	1	2	9	Mock_Mock
Myzus persicae	3	1	5	9	Mock_Mock
Myzus persicae	3	1	2	6	Mock_Mock
Myzus persicae	1	24	6	7	Mock_Mock
Myzus persicae	1	24	5	8	Mock_Mock
Myzus persicae	1	24	3	7	Mock_Mock
Myzus persicae	1	24	6	7	Mock_Mock
Myzus persicae	1	24	7	6	Mock_Mock
Myzus persicae	2	24	4	7	Mock_Mock
Myzus persicae	2	24	1	2	Mock_Mock
Myzus persicae	2	24	5	7	Mock_Mock
Myzus persicae	2	24	4	4	Mock_Mock
Myzus persicae	2	24	5	4	Mock_Mock
Myzus persicae	3	24	7	5	Mock_Mock
Myzus persicae	3	24	4	10	Mock_Mock
Myzus persicae	3	24	6	4	Mock_Mock
Myzus persicae	3	24	5	4	Mock_Mock
Myzus persicae	3	24	6	3	Mock_Mock
Macrosiphum euphorbiae	1	1	10	1	Mock_FLL
Macrosiphum euphorbiae	1	1	4	14	Mock_FLL
Macrosiphum euphorbiae	1	1	7	2	Mock_FLL
Macrosiphum euphorbiae	1	1	6	6	Mock_FLL
Macrosiphum euphorbiae	1	1	11	3	Mock_FLL
Macrosiphum euphorbiae	1	1	7	8	Mock_FLL
Macrosiphum euphorbiae	1	1	7	10	Mock_FLL
Macrosiphum euphorbiae	1	1	3	11	Mock_FLL
Macrosiphum euphorbiae	1	1	8	6	Mock_FLL
Macrosiphum euphorbiae	2	1	6	10	Mock_FLL
Macrosiphum euphorbiae	2	1	7	3	Mock_FLL
Macrosiphum euphorbiae	2	1	7	4	Mock_FLL
Macrosiphum euphorbiae	2	1	9	4	Mock_FLL
Macrosiphum euphorbiae	2	1	5	8	Mock_FLL
Macrosiphum euphorbiae	2	1	3	9	Mock_FLL
Macrosiphum euphorbiae	2	1	10	2	Mock_FLL
Macrosiphum euphorbiae	2	1	0	8	Mock_FLL
Macrosiphum euphorbiae	3	1	8	5	Mock_FLL
Macrosiphum euphorbiae	3	1	6	8	Mock_FLL
Macrosiphum euphorbiae	3	1	8	1	Mock_FLL
Macrosiphum euphorbiae	3	1	9	9	Mock_FLL
Macrosiphum euphorbiae	3	1	2	8	Mock_FLL
Macrosiphum euphorbiae	3	1	7	6	Mock_FLL
Macrosiphum euphorbiae	3	1	6	8	Mock_FLL
Macrosiphum euphorbiae	4	1	13	3	Mock_FLL
Macrosiphum euphorbiae	4	1	8	3	Mock_FLL
Macrosiphum euphorbiae	4	1	8	6	Mock_FLL
Macrosiphum euphorbiae	4	1	4	6	Mock_FLL
Macrosiphum euphorbiae	4	1	2	10	Mock_FLL
Macrosiphum euphorbiae	1	24	9	5	Mock_FLL
Macrosiphum euphorbiae	1	24	4	12	Mock_FLL
Macrosiphum euphorbiae	1	24	11	4	Mock_FLL
Macrosiphum euphorbiae	1	24	6	11	Mock_FLL
Macrosiphum euphorbiae	1	24	11	5	Mock_FLL
Macrosiphum euphorbiae	1	24	6	8	Mock_FLL
Macrosiphum euphorbiae	1	24	8	8	Mock_FLL
Macrosiphum euphorbiae	1	24	9	5	Mock_FLL
Macrosiphum euphorbiae	1	24	8	6	Mock_FLL
Macrosiphum euphorbiae	2	24	6	9	Mock_FLL
Macrosiphum euphorbiae	2	24	7	7	Mock_FLL
Macrosiphum euphorbiae	2	24	9	2	Mock_FLL
Macrosiphum euphorbiae	2	24	6	7	Mock_FLL
Macrosiphum euphorbiae	2	24	4	6	Mock_FLL
Macrosiphum euphorbiae	2	24	6	4	Mock_FLL
Macrosiphum euphorbiae	2	24	13	4	Mock_FLL
Macrosiphum euphorbiae	2	24	4	8	Mock_FLL
Macrosiphum euphorbiae	3	24	8	5	Mock_FLL
Macrosiphum euphorbiae	3	24	8	6	Mock_FLL
Macrosiphum euphorbiae	3	24	9	3	Mock_FLL
Macrosiphum euphorbiae	3	24	6	8	Mock_FLL
Macrosiphum euphorbiae	3	24	6	8	Mock_FLL
Macrosiphum euphorbiae	3	24	7	7	Mock_FLL
Macrosiphum euphorbiae	3	24	9	6	Mock_FLL
Macrosiphum euphorbiae	4	24	10	7	Mock_FLL
Macrosiphum euphorbiae	4	24	7	3	Mock_FLL
Macrosiphum euphorbiae	4	24	9	7	Mock_FLL
Macrosiphum euphorbiae	4	24	2	4	Mock_FLL
Macrosiphum euphorbiae	4	24	2	5	Mock_FLL
Macrosiphum euphorbiae	1	1	10	6	Mock_LFL
Macrosiphum euphorbiae	1	1	13	3	Mock_LFL
Macrosiphum euphorbiae	1	1	2	7	Mock_LFL
Macrosiphum euphorbiae	1	1	8	4	Mock_LFL
Macrosiphum euphorbiae	1	1	6	9	Mock_LFL
Macrosiphum euphorbiae	1	1	9	2	Mock_LFL
Macrosiphum euphorbiae	1	1	9	1	Mock_LFL
Macrosiphum euphorbiae	1	1	11	2	Mock_LFL
Macrosiphum euphorbiae	2	1	3	7	Mock_LFL
Macrosiphum euphorbiae	2	1	7	6	Mock_LFL
Macrosiphum euphorbiae	2	1	12	1	Mock_LFL
Macrosiphum euphorbiae	2	1	8	4	Mock_LFL
Macrosiphum euphorbiae	2	1	11	2	Mock_LFL
Macrosiphum euphorbiae	2	1	6	9	Mock_LFL
Macrosiphum euphorbiae	3	1	11	5	Mock_LFL
Macrosiphum euphorbiae	3	1	10	3	Mock_LFL
Macrosiphum euphorbiae	3	1	8	4	Mock_LFL
Macrosiphum euphorbiae	3	1	6	3	Mock_LFL
Macrosiphum euphorbiae	3	1	8	2	Mock_LFL
Macrosiphum euphorbiae	3	1	6	5	Mock_LFL
Macrosiphum euphorbiae	3	1	5	5	Mock_LFL
Macrosiphum euphorbiae	4	1	5	8	Mock_LFL
Macrosiphum euphorbiae	4	1	11	6	Mock_LFL
Macrosiphum euphorbiae	4	1	3	11	Mock_LFL
Macrosiphum euphorbiae	4	1	3	9	Mock_LFL
Macrosiphum euphorbiae	4	1	5	3	Mock_LFL
Macrosiphum euphorbiae	4	1	10	2	Mock_LFL
Macrosiphum euphorbiae	4	1	9	4	Mock_LFL
Macrosiphum euphorbiae	1	24	13	3	Mock_LFL
Macrosiphum euphorbiae	1	24	11	4	Mock_LFL
Macrosiphum euphorbiae	1	24	13	2	Mock_LFL
Macrosiphum euphorbiae	1	24	6	6	Mock_LFL
Macrosiphum euphorbiae	1	24	8	6	Mock_LFL
Macrosiphum euphorbiae	1	24	12	3	Mock_LFL
Macrosiphum euphorbiae	1	24	9	3	Mock_LFL
Macrosiphum euphorbiae	1	24	13	2	Mock_LFL
Macrosiphum euphorbiae	2	24	12	3	Mock_LFL
Macrosiphum euphorbiae	2	24	10	5	Mock_LFL
Macrosiphum euphorbiae	2	24	10	2	Mock_LFL
Macrosiphum euphorbiae	2	24	14	2	Mock_LFL
Macrosiphum euphorbiae	2	24	14	0	Mock_LFL
Macrosiphum euphorbiae	2	24	10	2	Mock_LFL
Macrosiphum euphorbiae	3	24	14	3	Mock_LFL
Macrosiphum euphorbiae	3	24	6	14	Mock_LFL
Macrosiphum euphorbiae	3	24	7	7	Mock_LFL
Macrosiphum euphorbiae	3	24	4	1	Mock_LFL
Macrosiphum euphorbiae	3	24	10	2	Mock_LFL
Macrosiphum euphorbiae	3	24	13	2	Mock_LFL
Macrosiphum euphorbiae	3	24	9	3	Mock_LFL
Macrosiphum euphorbiae	4	24	7	3	Mock_LFL
Macrosiphum euphorbiae	4	24	7	4	Mock_LFL
Macrosiphum euphorbiae	4	24	4	5	Mock_LFL
Macrosiphum euphorbiae	4	24	10	5	Mock_LFL
Macrosiphum euphorbiae	4	24	10	1	Mock_LFL
Macrosiphum euphorbiae	4	24	9	5	Mock_LFL
Macrosiphum euphorbiae	4	24	4	5	Mock_LFL
Macrosiphum euphorbiae	1	1	3	9	Mock_LFF
Macrosiphum euphorbiae	1	1	1	9	Mock_LFF
Macrosiphum euphorbiae	1	1	4	9	Mock_LFF
Macrosiphum euphorbiae	1	1	9	7	Mock_LFF
Macrosiphum euphorbiae	1	1	5	8	Mock_LFF
Macrosiphum euphorbiae	1	1	12	2	Mock_LFF
Macrosiphum euphorbiae	1	1	3	9	Mock_LFF
Macrosiphum euphorbiae	1	1	6	7	Mock_LFF
Macrosiphum euphorbiae	1	1	16	0	Mock_LFF
Macrosiphum euphorbiae	2	1	8	10	Mock_LFF
Macrosiphum euphorbiae	2	1	5	5	Mock_LFF
Macrosiphum euphorbiae	2	1	3	8	Mock_LFF
Macrosiphum euphorbiae	2	1	6	11	Mock_LFF
Macrosiphum euphorbiae	2	1	6	6	Mock_LFF
Macrosiphum euphorbiae	2	1	9	5	Mock_LFF
Macrosiphum euphorbiae	3	1	4	5	Mock_LFF
Macrosiphum euphorbiae	3	1	6	6	Mock_LFF
Macrosiphum euphorbiae	3	1	9	4	Mock_LFF
Macrosiphum euphorbiae	3	1	8	7	Mock_LFF
Macrosiphum euphorbiae	3	1	7	9	Mock_LFF
Macrosiphum euphorbiae	1	24	5	6	Mock_LFF
Macrosiphum euphorbiae	1	24	5	11	Mock_LFF
Macrosiphum euphorbiae	1	24	7	8	Mock_LFF
Macrosiphum euphorbiae	1	24	8	9	Mock_LFF
Macrosiphum euphorbiae	1	24	7	8	Mock_LFF
Macrosiphum euphorbiae	1	24	8	8	Mock_LFF
Macrosiphum euphorbiae	1	24	4	10	Mock_LFF
Macrosiphum euphorbiae	1	24	8	5	Mock_LFF
Macrosiphum euphorbiae	1	24	13	1	Mock_LFF
Macrosiphum euphorbiae	2	24	5	7	Mock_LFF
Macrosiphum euphorbiae	2	24	9	5	Mock_LFF
Macrosiphum euphorbiae	2	24	3	4	Mock_LFF
Macrosiphum euphorbiae	2	24	5	7	Mock_LFF
Macrosiphum euphorbiae	2	24	1	4	Mock_LFF
Macrosiphum euphorbiae	2	24	10	5	Mock_LFF
Macrosiphum euphorbiae	3	24	2	5	Mock_LFF
Macrosiphum euphorbiae	3	24	5	7	Mock_LFF
Macrosiphum euphorbiae	3	24	5	8	Mock_LFF
Macrosiphum euphorbiae	3	24	7	4	Mock_LFF
Macrosiphum euphorbiae	3	24	7	9	Mock_LFF
Macrosiphum euphorbiae	1	1	15	2	Mock_FFL
Macrosiphum euphorbiae	1	1	16	1	Mock_FFL
Macrosiphum euphorbiae	1	1	7	9	Mock_FFL
Macrosiphum euphorbiae	1	1	1	6	Mock_FFL
Macrosiphum euphorbiae	1	1	11	5	Mock_FFL
Macrosiphum euphorbiae	1	1	5	9	Mock_FFL
Macrosiphum euphorbiae	1	1	14	2	Mock_FFL
Macrosiphum euphorbiae	1	1	15	3	Mock_FFL
Macrosiphum euphorbiae	1	1	12	1	Mock_FFL
Macrosiphum euphorbiae	2	1	9	5	Mock_FFL
Macrosiphum euphorbiae	2	1	12	1	Mock_FFL
Macrosiphum euphorbiae	2	1	10	8	Mock_FFL
Macrosiphum euphorbiae	2	1	9	6	Mock_FFL
Macrosiphum euphorbiae	2	1	12	2	Mock_FFL
Macrosiphum euphorbiae	2	1	9	4	Mock_FFL
Macrosiphum euphorbiae	3	1	12	4	Mock_FFL
Macrosiphum euphorbiae	3	1	12	3	Mock_FFL
Macrosiphum euphorbiae	3	1	13	2	Mock_FFL
Macrosiphum euphorbiae	3	1	11	4	Mock_FFL
Macrosiphum euphorbiae	3	1	10	3	Mock_FFL
Macrosiphum euphorbiae	3	1	15	0	Mock_FFL
Macrosiphum euphorbiae	3	1	14	0	Mock_FFL
Macrosiphum euphorbiae	1	24	12	5	Mock_FFL
Macrosiphum euphorbiae	1	24	13	1	Mock_FFL
Macrosiphum euphorbiae	1	24	10	2	Mock_FFL
Macrosiphum euphorbiae	1	24	2	5	Mock_FFL
Macrosiphum euphorbiae	1	24	10	3	Mock_FFL
Macrosiphum euphorbiae	1	24	8	5	Mock_FFL
Macrosiphum euphorbiae	1	24	13	0	Mock_FFL
Macrosiphum euphorbiae	1	24	12	1	Mock_FFL
Macrosiphum euphorbiae	1	24	13	1	Mock_FFL
Macrosiphum euphorbiae	2	24	13	3	Mock_FFL
Macrosiphum euphorbiae	2	24	11	1	Mock_FFL
Macrosiphum euphorbiae	2	24	6	6	Mock_FFL
Macrosiphum euphorbiae	2	24	8	5	Mock_FFL
Macrosiphum euphorbiae	2	24	13	0	Mock_FFL
Macrosiphum euphorbiae	2	24	8	4	Mock_FFL
Macrosiphum euphorbiae	3	24	8	5	Mock_FFL
Macrosiphum euphorbiae	3	24	10	5	Mock_FFL
Macrosiphum euphorbiae	3	24	15	0	Mock_FFL
Macrosiphum euphorbiae	3	24	15	1	Mock_FFL
Macrosiphum euphorbiae	3	24	14	2	Mock_FFL
Macrosiphum euphorbiae	3	24	12	2	Mock_FFL
Macrosiphum euphorbiae	3	24	15	1	Mock_FFL
Macrosiphum euphorbiae	1	1	8	1	Mock_FLF
Macrosiphum euphorbiae	1	1	4	7	Mock_FLF
Macrosiphum euphorbiae	1	1	7	9	Mock_FLF
Macrosiphum euphorbiae	1	1	4	8	Mock_FLF
Macrosiphum euphorbiae	1	1	2	12	Mock_FLF
Macrosiphum euphorbiae	1	1	8	4	Mock_FLF
Macrosiphum euphorbiae	1	1	3	10	Mock_FLF
Macrosiphum euphorbiae	1	1	5	5	Mock_FLF
Macrosiphum euphorbiae	2	1	5	5	Mock_FLF
Macrosiphum euphorbiae	2	1	4	11	Mock_FLF
Macrosiphum euphorbiae	2	1	9	9	Mock_FLF
Macrosiphum euphorbiae	2	1	10	5	Mock_FLF
Macrosiphum euphorbiae	2	1	14	3	Mock_FLF
Macrosiphum euphorbiae	2	1	1	9	Mock_FLF
Macrosiphum euphorbiae	2	1	12	0	Mock_FLF
Macrosiphum euphorbiae	2	1	2	12	Mock_FLF
Macrosiphum euphorbiae	3	1	4	5	Mock_FLF
Macrosiphum euphorbiae	3	1	3	10	Mock_FLF
Macrosiphum euphorbiae	3	1	8	5	Mock_FLF
Macrosiphum euphorbiae	3	1	5	8	Mock_FLF
Macrosiphum euphorbiae	3	1	6	2	Mock_FLF
Macrosiphum euphorbiae	3	1	8	0	Mock_FLF
Macrosiphum euphorbiae	3	1	7	4	Mock_FLF
Macrosiphum euphorbiae	1	24	8	6	Mock_FLF
Macrosiphum euphorbiae	1	24	8	6	Mock_FLF
Macrosiphum euphorbiae	1	24	8	9	Mock_FLF
Macrosiphum euphorbiae	1	24	5	9	Mock_FLF
Macrosiphum euphorbiae	1	24	3	9	Mock_FLF
Macrosiphum euphorbiae	1	24	10	5	Mock_FLF
Macrosiphum euphorbiae	1	24	7	6	Mock_FLF
Macrosiphum euphorbiae	1	24	3	8	Mock_FLF
Macrosiphum euphorbiae	2	24	3	8	Mock_FLF
Macrosiphum euphorbiae	2	24	4	12	Mock_FLF
Macrosiphum euphorbiae	2	24	7	9	Mock_FLF
Macrosiphum euphorbiae	2	24	8	9	Mock_FLF
Macrosiphum euphorbiae	2	24	11	6	Mock_FLF
Macrosiphum euphorbiae	2	24	6	9	Mock_FLF
Macrosiphum euphorbiae	2	24	10	3	Mock_FLF
Macrosiphum euphorbiae	2	24	9	7	Mock_FLF
Macrosiphum euphorbiae	3	24	5	9	Mock_FLF
Macrosiphum euphorbiae	3	24	4	8	Mock_FLF
Macrosiphum euphorbiae	3	24	5	2	Mock_FLF
Macrosiphum euphorbiae	3	24	6	7	Mock_FLF
Macrosiphum euphorbiae	3	24	5	4	Mock_FLF
Macrosiphum euphorbiae	3	24	6	7	Mock_FLF
Macrosiphum euphorbiae	3	24	6	10	Mock_FLF
Macrosiphum euphorbiae	1	1	5	11	Mock_LLF
Macrosiphum euphorbiae	1	1	8	6	Mock_LLF
Macrosiphum euphorbiae	1	1	12	3	Mock_LLF
Macrosiphum euphorbiae	1	1	6	11	Mock_LLF
Macrosiphum euphorbiae	1	1	10	7	Mock_LLF
Macrosiphum euphorbiae	1	1	9	6	Mock_LLF
Macrosiphum euphorbiae	1	1	7	7	Mock_LLF
Macrosiphum euphorbiae	1	1	4	10	Mock_LLF
Macrosiphum euphorbiae	2	1	9	4	Mock_LLF
Macrosiphum euphorbiae	2	1	5	3	Mock_LLF
Macrosiphum euphorbiae	2	1	3	12	Mock_LLF
Macrosiphum euphorbiae	2	1	6	9	Mock_LLF
Macrosiphum euphorbiae	2	1	5	9	Mock_LLF
Macrosiphum euphorbiae	2	1	2	0	Mock_LLF
Macrosiphum euphorbiae	3	1	5	10	Mock_LLF
Macrosiphum euphorbiae	3	1	10	5	Mock_LLF
Macrosiphum euphorbiae	3	1	8	6	Mock_LLF
Macrosiphum euphorbiae	3	1	10	6	Mock_LLF
Macrosiphum euphorbiae	3	1	4	2	Mock_LLF
Macrosiphum euphorbiae	3	1	1	5	Mock_LLF
Macrosiphum euphorbiae	1	24	2	10	Mock_LLF
Macrosiphum euphorbiae	1	24	9	5	Mock_LLF
Macrosiphum euphorbiae	1	24	11	6	Mock_LLF
Macrosiphum euphorbiae	1	24	7	4	Mock_LLF
Macrosiphum euphorbiae	1	24	6	8	Mock_LLF
Macrosiphum euphorbiae	1	24	9	7	Mock_LLF
Macrosiphum euphorbiae	1	24	5	4	Mock_LLF
Macrosiphum euphorbiae	1	24	4	7	Mock_LLF
Macrosiphum euphorbiae	2	24	11	4	Mock_LLF
Macrosiphum euphorbiae	2	24	6	8	Mock_LLF
Macrosiphum euphorbiae	2	24	11	5	Mock_LLF
Macrosiphum euphorbiae	2	24	2	7	Mock_LLF
Macrosiphum euphorbiae	2	24	6	5	Mock_LLF
Macrosiphum euphorbiae	2	24	3	4	Mock_LLF
Macrosiphum euphorbiae	3	24	4	10	Mock_LLF
Macrosiphum euphorbiae	3	24	5	6	Mock_LLF
Macrosiphum euphorbiae	3	24	7	5	Mock_LLF
Macrosiphum euphorbiae	3	24	12	6	Mock_LLF
Macrosiphum euphorbiae	3	24	8	7	Mock_LLF
Macrosiphum euphorbiae	3	24	5	6	Mock_LLF
Macrosiphum euphorbiae	1	1	13	5	Mock_CMV
Macrosiphum euphorbiae	1	1	2	11	Mock_CMV
Macrosiphum euphorbiae	1	1	16	0	Mock_CMV
Macrosiphum euphorbiae	1	1	13	4	Mock_CMV
Macrosiphum euphorbiae	1	1	10	3	Mock_CMV
Macrosiphum euphorbiae	1	1	14	1	Mock_CMV
Macrosiphum euphorbiae	2	1	14	0	Mock_CMV
Macrosiphum euphorbiae	2	1	6	8	Mock_CMV
Macrosiphum euphorbiae	2	1	9	0	Mock_CMV
Macrosiphum euphorbiae	2	1	12	3	Mock_CMV
Macrosiphum euphorbiae	2	1	11	3	Mock_CMV
Macrosiphum euphorbiae	2	1	17	0	Mock_CMV
Macrosiphum euphorbiae	3	1	11	0	Mock_CMV
Macrosiphum euphorbiae	3	1	12	2	Mock_CMV
Macrosiphum euphorbiae	3	1	13	1	Mock_CMV
Macrosiphum euphorbiae	3	1	12	0	Mock_CMV
Macrosiphum euphorbiae	3	1	12	0	Mock_CMV
Macrosiphum euphorbiae	3	1	6	7	Mock_CMV
Macrosiphum euphorbiae	3	1	12	1	Mock_CMV
Macrosiphum euphorbiae	4	1	5	4	Mock_CMV
Macrosiphum euphorbiae	4	1	10	3	Mock_CMV
Macrosiphum euphorbiae	4	1	11	1	Mock_CMV
Macrosiphum euphorbiae	4	1	14	0	Mock_CMV
Macrosiphum euphorbiae	4	1	5	8	Mock_CMV
Macrosiphum euphorbiae	4	1	9	3	Mock_CMV
Macrosiphum euphorbiae	1	24	12	1	Mock_CMV
Macrosiphum euphorbiae	1	24	5	8	Mock_CMV
Macrosiphum euphorbiae	1	24	13	1	Mock_CMV
Macrosiphum euphorbiae	1	24	12	0	Mock_CMV
Macrosiphum euphorbiae	1	24	12	1	Mock_CMV
Macrosiphum euphorbiae	1	24	12	0	Mock_CMV
Macrosiphum euphorbiae	2	24	11	2	Mock_CMV
Macrosiphum euphorbiae	2	24	10	3	Mock_CMV
Macrosiphum euphorbiae	2	24	12	0	Mock_CMV
Macrosiphum euphorbiae	2	24	7	2	Mock_CMV
Macrosiphum euphorbiae	2	24	8	2	Mock_CMV
Macrosiphum euphorbiae	2	24	14	0	Mock_CMV
Macrosiphum euphorbiae	3	24	14	2	Mock_CMV
Macrosiphum euphorbiae	3	24	12	2	Mock_CMV
Macrosiphum euphorbiae	3	24	14	3	Mock_CMV
Macrosiphum euphorbiae	3	24	13	0	Mock_CMV
Macrosiphum euphorbiae	3	24	13	1	Mock_CMV
Macrosiphum euphorbiae	3	24	10	6	Mock_CMV
Macrosiphum euphorbiae	3	24	14	0	Mock_CMV
Macrosiphum euphorbiae	4	24	9	2	Mock_CMV
Macrosiphum euphorbiae	4	24	8	3	Mock_CMV
Macrosiphum euphorbiae	4	24	7	1	Mock_CMV
Macrosiphum euphorbiae	4	24	12	1	Mock_CMV
Macrosiphum euphorbiae	4	24	6	9	Mock_CMV
Macrosiphum euphorbiae	4	24	13	5	Mock_CMV
Macrosiphum euphorbiae	1	1	8	4	Mock_CMV
Macrosiphum euphorbiae	1	1	14	1	Mock_CMV
Macrosiphum euphorbiae	1	1	13	2	Mock_CMV
Macrosiphum euphorbiae	1	1	10	1	Mock_CMV
Macrosiphum euphorbiae	1	1	5	4	Mock_CMV
Macrosiphum euphorbiae	1	1	6	1	Mock_CMV
Macrosiphum euphorbiae	2	1	12	5	Mock_CMV
Macrosiphum euphorbiae	2	1	12	4	Mock_CMV
Macrosiphum euphorbiae	2	1	9	8	Mock_CMV
Macrosiphum euphorbiae	2	1	13	4	Mock_CMV
Macrosiphum euphorbiae	2	1	14	3	Mock_CMV
Macrosiphum euphorbiae	2	1	13	2	Mock_CMV
Macrosiphum euphorbiae	3	1	5	4	Mock_CMV
Macrosiphum euphorbiae	3	1	11	3	Mock_CMV
Macrosiphum euphorbiae	3	1	11	1	Mock_CMV
Macrosiphum euphorbiae	3	1	6	13	Mock_CMV
Macrosiphum euphorbiae	3	1	14	0	Mock_CMV
Macrosiphum euphorbiae	1	24	7	6	Mock_CMV
Macrosiphum euphorbiae	1	24	12	0	Mock_CMV
Macrosiphum euphorbiae	1	24	10	2	Mock_CMV
Macrosiphum euphorbiae	1	24	12	0	Mock_CMV
Macrosiphum euphorbiae	1	24	5	0	Mock_CMV
Macrosiphum euphorbiae	1	24	7	1	Mock_CMV
Macrosiphum euphorbiae	2	24	7	3	Mock_CMV
Macrosiphum euphorbiae	2	24	13	2	Mock_CMV
Macrosiphum euphorbiae	2	24	9	3	Mock_CMV
Macrosiphum euphorbiae	2	24	10	4	Mock_CMV
Macrosiphum euphorbiae	2	24	18	2	Mock_CMV
Macrosiphum euphorbiae	2	24	10	3	Mock_CMV
Macrosiphum euphorbiae	3	24	11	4	Mock_CMV
Macrosiphum euphorbiae	3	24	9	3	Mock_CMV
Macrosiphum euphorbiae	3	24	7	2	Mock_CMV
Macrosiphum euphorbiae	3	24	5	11	Mock_CMV
Macrosiphum euphorbiae	3	24	12	1	Mock_CMV
Macrosiphum euphorbiae	1	1	2	10	Mock_LSCMV
Macrosiphum euphorbiae	1	1	6	7	Mock_LSCMV
Macrosiphum euphorbiae	1	1	8	3	Mock_LSCMV
Macrosiphum euphorbiae	1	1	7	6	Mock_LSCMV
Macrosiphum euphorbiae	1	1	1	6	Mock_LSCMV
Macrosiphum euphorbiae	2	1	1	12	Mock_LSCMV
Macrosiphum euphorbiae	2	1	5	9	Mock_LSCMV
Macrosiphum euphorbiae	2	1	5	9	Mock_LSCMV
Macrosiphum euphorbiae	2	1	8	4	Mock_LSCMV
Macrosiphum euphorbiae	2	1	4	10	Mock_LSCMV
Macrosiphum euphorbiae	2	1	8	1	Mock_LSCMV
Macrosiphum euphorbiae	3	1	9	5	Mock_LSCMV
Macrosiphum euphorbiae	3	1	8	4	Mock_LSCMV
Macrosiphum euphorbiae	3	1	6	6	Mock_LSCMV
Macrosiphum euphorbiae	3	1	7	7	Mock_LSCMV
Macrosiphum euphorbiae	3	1	6	8	Mock_LSCMV
Macrosiphum euphorbiae	3	1	7	6	Mock_LSCMV
Macrosiphum euphorbiae	4	1	15	2	Mock_LSCMV
Macrosiphum euphorbiae	4	1	5	2	Mock_LSCMV
Macrosiphum euphorbiae	4	1	2	10	Mock_LSCMV
Macrosiphum euphorbiae	4	1	1	11	Mock_LSCMV
Macrosiphum euphorbiae	4	1	6	8	Mock_LSCMV
Macrosiphum euphorbiae	1	24	5	6	Mock_LSCMV
Macrosiphum euphorbiae	1	24	6	5	Mock_LSCMV
Macrosiphum euphorbiae	1	24	11	4	Mock_LSCMV
Macrosiphum euphorbiae	1	24	5	3	Mock_LSCMV
Macrosiphum euphorbiae	1	24	5	6	Mock_LSCMV
Macrosiphum euphorbiae	2	24	3	10	Mock_LSCMV
Macrosiphum euphorbiae	2	24	7	9	Mock_LSCMV
Macrosiphum euphorbiae	2	24	5	3	Mock_LSCMV
Macrosiphum euphorbiae	2	24	4	6	Mock_LSCMV
Macrosiphum euphorbiae	2	24	8	7	Mock_LSCMV
Macrosiphum euphorbiae	2	24	9	3	Mock_LSCMV
Macrosiphum euphorbiae	3	24	11	3	Mock_LSCMV
Macrosiphum euphorbiae	3	24	9	6	Mock_LSCMV
Macrosiphum euphorbiae	3	24	8	4	Mock_LSCMV
Macrosiphum euphorbiae	3	24	6	7	Mock_LSCMV
Macrosiphum euphorbiae	3	24	7	8	Mock_LSCMV
Macrosiphum euphorbiae	3	24	5	8	Mock_LSCMV
Macrosiphum euphorbiae	4	24	16	2	Mock_LSCMV
Macrosiphum euphorbiae	4	24	8	4	Mock_LSCMV
Macrosiphum euphorbiae	4	24	6	10	Mock_LSCMV
Macrosiphum euphorbiae	4	24	3	8	Mock_LSCMV
Macrosiphum euphorbiae	4	24	6	9	Mock_LSCMV
Macrosiphum euphorbiae	1	1	2	10	Mock_LSCMV
Macrosiphum euphorbiae	1	1	6	7	Mock_LSCMV
Macrosiphum euphorbiae	1	1	8	3	Mock_LSCMV
Macrosiphum euphorbiae	1	1	7	6	Mock_LSCMV
Macrosiphum euphorbiae	1	1	1	6	Mock_LSCMV
Macrosiphum euphorbiae	2	1	11	5	Mock_LSCMV
Macrosiphum euphorbiae	2	1	9	6	Mock_LSCMV
Macrosiphum euphorbiae	2	1	7	7	Mock_LSCMV
Macrosiphum euphorbiae	2	1	6	6	Mock_LSCMV
Macrosiphum euphorbiae	2	1	6	4	Mock_LSCMV
Macrosiphum euphorbiae	3	1	15	3	Mock_LSCMV
Macrosiphum euphorbiae	3	1	7	2	Mock_LSCMV
Macrosiphum euphorbiae	3	1	3	9	Mock_LSCMV
Macrosiphum euphorbiae	3	1	1	11	Mock_LSCMV
Macrosiphum euphorbiae	3	1	6	8	Mock_LSCMV
Macrosiphum euphorbiae	1	24	5	6	Mock_LSCMV
Macrosiphum euphorbiae	1	24	6	5	Mock_LSCMV
Macrosiphum euphorbiae	1	24	11	4	Mock_LSCMV
Macrosiphum euphorbiae	1	24	5	3	Mock_LSCMV
Macrosiphum euphorbiae	1	24	5	6	Mock_LSCMV
Macrosiphum euphorbiae	2	24	10	6	Mock_LSCMV
Macrosiphum euphorbiae	2	24	11	7	Mock_LSCMV
Macrosiphum euphorbiae	2	24	6	7	Mock_LSCMV
Macrosiphum euphorbiae	2	24	8	4	Mock_LSCMV
Macrosiphum euphorbiae	2	24	8	5	Mock_LSCMV
Macrosiphum euphorbiae	3	24	16	3	Mock_LSCMV
Macrosiphum euphorbiae	3	24	8	2	Mock_LSCMV
Macrosiphum euphorbiae	3	24	5	12	Mock_LSCMV
Macrosiphum euphorbiae	3	24	4	9	Mock_LSCMV
Macrosiphum euphorbiae	3	24	6	12	Mock_LSCMV
Macrosiphum euphorbiae	1	1	5	8	Mock_Mock
Macrosiphum euphorbiae	1	1	5	10	Mock_Mock
Macrosiphum euphorbiae	1	1	6	7	Mock_Mock
Macrosiphum euphorbiae	1	1	9	2	Mock_Mock
Macrosiphum euphorbiae	1	1	7	1	Mock_Mock
Macrosiphum euphorbiae	2	1	2	11	Mock_Mock
Macrosiphum euphorbiae	2	1	4	6	Mock_Mock
Macrosiphum euphorbiae	2	1	4	4	Mock_Mock
Macrosiphum euphorbiae	2	1	0	16	Mock_Mock
Macrosiphum euphorbiae	2	1	13	0	Mock_Mock
Macrosiphum euphorbiae	2	1	9	1	Mock_Mock
Macrosiphum euphorbiae	3	1	5	6	Mock_Mock
Macrosiphum euphorbiae	3	1	6	6	Mock_Mock
Macrosiphum euphorbiae	3	1	7	8	Mock_Mock
Macrosiphum euphorbiae	3	1	8	1	Mock_Mock
Macrosiphum euphorbiae	3	1	9	7	Mock_Mock
Macrosiphum euphorbiae	3	1	9	1	Mock_Mock
Macrosiphum euphorbiae	3	1	4	7	Mock_Mock
Macrosiphum euphorbiae	4	1	2	10	Mock_Mock
Macrosiphum euphorbiae	4	1	11	2	Mock_Mock
Macrosiphum euphorbiae	4	1	6	7	Mock_Mock
Macrosiphum euphorbiae	4	1	10	4	Mock_Mock
Macrosiphum euphorbiae	4	1	1	11	Mock_Mock
Macrosiphum euphorbiae	1	24	7	7	Mock_Mock
Macrosiphum euphorbiae	1	24	8	7	Mock_Mock
Macrosiphum euphorbiae	1	24	4	15	Mock_Mock
Macrosiphum euphorbiae	1	24	13	5	Mock_Mock
Macrosiphum euphorbiae	1	24	6	5	Mock_Mock
Macrosiphum euphorbiae	2	24	4	6	Mock_Mock
Macrosiphum euphorbiae	2	24	3	8	Mock_Mock
Macrosiphum euphorbiae	2	24	8	8	Mock_Mock
Macrosiphum euphorbiae	2	24	0	13	Mock_Mock
Macrosiphum euphorbiae	2	24	10	4	Mock_Mock
Macrosiphum euphorbiae	2	24	11	4	Mock_Mock
Macrosiphum euphorbiae	3	24	7	4	Mock_Mock
Macrosiphum euphorbiae	3	24	10	4	Mock_Mock
Macrosiphum euphorbiae	3	24	6	8	Mock_Mock
Macrosiphum euphorbiae	3	24	8	0	Mock_Mock
Macrosiphum euphorbiae	3	24	6	7	Mock_Mock
Macrosiphum euphorbiae	3	24	11	4	Mock_Mock
Macrosiphum euphorbiae	3	24	5	10	Mock_Mock
Macrosiphum euphorbiae	4	24	7	4	Mock_Mock
Macrosiphum euphorbiae	4	24	6	5	Mock_Mock
Macrosiphum euphorbiae	4	24	3	7	Mock_Mock
Macrosiphum euphorbiae	4	24	7	2	Mock_Mock
Macrosiphum euphorbiae	4	24	3	6	Mock_Mock
Macrosiphum euphorbiae	1	1	5	8	Mock_Mock
Macrosiphum euphorbiae	1	1	5	10	Mock_Mock
Macrosiphum euphorbiae	1	1	6	7	Mock_Mock
Macrosiphum euphorbiae	1	1	9	2	Mock_Mock
Macrosiphum euphorbiae	1	1	7	1	Mock_Mock
Macrosiphum euphorbiae	2	1	4	8	Mock_Mock
Macrosiphum euphorbiae	2	1	3	9	Mock_Mock
Macrosiphum euphorbiae	2	1	2	6	Mock_Mock
Macrosiphum euphorbiae	2	1	8	5	Mock_Mock
Macrosiphum euphorbiae	2	1	8	0	Mock_Mock
Macrosiphum euphorbiae	3	1	11	6	Mock_Mock
Macrosiphum euphorbiae	3	1	7	7	Mock_Mock
Macrosiphum euphorbiae	3	1	5	8	Mock_Mock
Macrosiphum euphorbiae	3	1	8	7	Mock_Mock
Macrosiphum euphorbiae	3	1	3	6	Mock_Mock
Macrosiphum euphorbiae	1	24	7	7	Mock_Mock
Macrosiphum euphorbiae	1	24	8	7	Mock_Mock
Macrosiphum euphorbiae	1	24	4	15	Mock_Mock
Macrosiphum euphorbiae	1	24	13	5	Mock_Mock
Macrosiphum euphorbiae	1	24	6	5	Mock_Mock
Macrosiphum euphorbiae	2	24	5	9	Mock_Mock
Macrosiphum euphorbiae	2	24	2	8	Mock_Mock
Macrosiphum euphorbiae	2	24	3	5	Mock_Mock
Macrosiphum euphorbiae	2	24	7	6	Mock_Mock
Macrosiphum euphorbiae	2	24	5	6	Mock_Mock
Macrosiphum euphorbiae	3	24	6	7	Mock_Mock
Macrosiphum euphorbiae	3	24	9	8	Mock_Mock
Macrosiphum euphorbiae	3	24	9	7	Mock_Mock
Macrosiphum euphorbiae	3	24	8	7	Mock_Mock
Macrosiphum euphorbiae	3	24	3	8	Mock_Mock

## Sheet: Figure 6
vector	experiment	time	A	B	A_B
Myzus persicae	1	1	1	10	Mock_F1F2(L2b)F3
Myzus persicae	1	1	9	3	Mock_F1F2(L2b)F3
Myzus persicae	1	1	3	2	Mock_F1F2(L2b)F3
Myzus persicae	1	1	2	8	Mock_F1F2(L2b)F3
Myzus persicae	1	1	12	1	Mock_F1F2(L2b)F3
Myzus persicae	1	1	5	7	Mock_F1F2(L2b)F3
Myzus persicae	2	1	2	3	Mock_F1F2(L2b)F3
Myzus persicae	2	1	3	5	Mock_F1F2(L2b)F3
Myzus persicae	2	1	17	2	Mock_F1F2(L2b)F3
Myzus persicae	2	1	14	2	Mock_F1F2(L2b)F3
Myzus persicae	2	1	3	11	Mock_F1F2(L2b)F3
Myzus persicae	3	1	8	9	Mock_F1F2(L2b)F3
Myzus persicae	3	1	2	11	Mock_F1F2(L2b)F3
Myzus persicae	3	1	11	2	Mock_F1F2(L2b)F3
Myzus persicae	3	1	7	1	Mock_F1F2(L2b)F3
Myzus persicae	3	1	8	6	Mock_F1F2(L2b)F3
Myzus persicae	4	1	2	12	Mock_F1F2(L2b)F3
Myzus persicae	4	1	3	8	Mock_F1F2(L2b)F3
Myzus persicae	4	1	3	4	Mock_F1F2(L2b)F3
Myzus persicae	4	1	5	0	Mock_F1F2(L2b)F3
Myzus persicae	4	1	12	3	Mock_F1F2(L2b)F3
Myzus persicae	5	1	4	8	Mock_F1F2(L2b)F3
Myzus persicae	5	1	11	2	Mock_F1F2(L2b)F3
Myzus persicae	5	1	2	11	Mock_F1F2(L2b)F3
Myzus persicae	5	1	1	7	Mock_F1F2(L2b)F3
Myzus persicae	5	1	6	8	Mock_F1F2(L2b)F3
Myzus persicae	1	24	6	4	Mock_F1F2(L2b)F3
Myzus persicae	1	24	8	5	Mock_F1F2(L2b)F3
Myzus persicae	1	24	8	6	Mock_F1F2(L2b)F3
Myzus persicae	1	24	6	5	Mock_F1F2(L2b)F3
Myzus persicae	1	24	12	3	Mock_F1F2(L2b)F3
Myzus persicae	1	24	7	6	Mock_F1F2(L2b)F3
Myzus persicae	2	24	7	1	Mock_F1F2(L2b)F3
Myzus persicae	2	24	2	11	Mock_F1F2(L2b)F3
Myzus persicae	2	24	8	5	Mock_F1F2(L2b)F3
Myzus persicae	2	24	12	4	Mock_F1F2(L2b)F3
Myzus persicae	2	24	4	9	Mock_F1F2(L2b)F3
Myzus persicae	3	24	7	9	Mock_F1F2(L2b)F3
Myzus persicae	3	24	3	9	Mock_F1F2(L2b)F3
Myzus persicae	3	24	4	5	Mock_F1F2(L2b)F3
Myzus persicae	3	24	2	3	Mock_F1F2(L2b)F3
Myzus persicae	3	24	6	3	Mock_F1F2(L2b)F3
Myzus persicae	4	24	1	8	Mock_F1F2(L2b)F3
Myzus persicae	4	24	7	6	Mock_F1F2(L2b)F3
Myzus persicae	4	24	4	5	Mock_F1F2(L2b)F3
Myzus persicae	4	24	9	4	Mock_F1F2(L2b)F3
Myzus persicae	4	24	11	1	Mock_F1F2(L2b)F3
Myzus persicae	5	24	9	7	Mock_F1F2(L2b)F3
Myzus persicae	5	24	9	3	Mock_F1F2(L2b)F3
Myzus persicae	5	24	5	4	Mock_F1F2(L2b)F3
Myzus persicae	5	24	3	2	Mock_F1F2(L2b)F3
Myzus persicae	5	24	3	6	Mock_F1F2(L2b)F3
Myzus persicae	1	1	8	6	Mock_CMV
Myzus persicae	1	1	3	6	Mock_CMV
Myzus persicae	1	1	4	0	Mock_CMV
Myzus persicae	1	1	0	5	Mock_CMV
Myzus persicae	1	1	4	3	Mock_CMV
Myzus persicae	1	1	13	0	Mock_CMV
Myzus persicae	2	1	4	2	Mock_CMV
Myzus persicae	2	1	7	1	Mock_CMV
Myzus persicae	2	1	6	0	Mock_CMV
Myzus persicae	2	1	2	0	Mock_CMV
Myzus persicae	2	1	1	3	Mock_CMV
Myzus persicae	3	1	2	4	Mock_CMV
Myzus persicae	3	1	2	0	Mock_CMV
Myzus persicae	3	1	5	0	Mock_CMV
Myzus persicae	3	1	13	0	Mock_CMV
Myzus persicae	3	1	8	2	Mock_CMV
Myzus persicae	4	1	3	0	Mock_CMV
Myzus persicae	4	1	5	1	Mock_CMV
Myzus persicae	4	1	2	0	Mock_CMV
Myzus persicae	4	1	4	0	Mock_CMV
Myzus persicae	4	1	5	1	Mock_CMV
Myzus persicae	5	1	13	2	Mock_CMV
Myzus persicae	5	1	7	4	Mock_CMV
Myzus persicae	5	1	14	0	Mock_CMV
Myzus persicae	5	1	1	3	Mock_CMV
Myzus persicae	5	1	9	2	Mock_CMV
Myzus persicae	1	24	9	2	Mock_CMV
Myzus persicae	1	24	10	3	Mock_CMV
Myzus persicae	1	24	6	1	Mock_CMV
Myzus persicae	1	24	8	2	Mock_CMV
Myzus persicae	1	24	6	2	Mock_CMV
Myzus persicae	1	24	9	3	Mock_CMV
Myzus persicae	2	24	13	1	Mock_CMV
Myzus persicae	2	24	4	2	Mock_CMV
Myzus persicae	2	24	11	0	Mock_CMV
Myzus persicae	2	24	4	7	Mock_CMV
Myzus persicae	2	24	11	3	Mock_CMV
Myzus persicae	3	24	6	7	Mock_CMV
Myzus persicae	3	24	12	1	Mock_CMV
Myzus persicae	3	24	6	0	Mock_CMV
Myzus persicae	3	24	14	2	Mock_CMV
Myzus persicae	3	24	8	3	Mock_CMV
Myzus persicae	4	24	9	2	Mock_CMV
Myzus persicae	4	24	6	1	Mock_CMV
Myzus persicae	4	24	8	3	Mock_CMV
Myzus persicae	4	24	5	1	Mock_CMV
Myzus persicae	4	24	5	3	Mock_CMV
Myzus persicae	5	24	13	1	Mock_CMV
Myzus persicae	5	24	6	3	Mock_CMV
Myzus persicae	5	24	11	0	Mock_CMV
Myzus persicae	5	24	5	4	Mock_CMV
Myzus persicae	5	24	7	1	Mock_CMV
Myzus persicae	1	1	6	3	Mock_Mock
Myzus persicae	1	1	1	7	Mock_Mock
Myzus persicae	1	1	7	1	Mock_Mock
Myzus persicae	1	1	7	4	Mock_Mock
Myzus persicae	1	1	5	6	Mock_Mock
Myzus persicae	2	1	12	2	Mock_Mock
Myzus persicae	2	1	2	14	Mock_Mock
Myzus persicae	2	1	3	6	Mock_Mock
Myzus persicae	2	1	6	4	Mock_Mock
Myzus persicae	2	1	9	10	Mock_Mock
Myzus persicae	3	1	12	1	Mock_Mock
Myzus persicae	3	1	3	12	Mock_Mock
Myzus persicae	3	1	12	0	Mock_Mock
Myzus persicae	3	1	2	8	Mock_Mock
Myzus persicae	3	1	3	0	Mock_Mock
Myzus persicae	4	1	4	4	Mock_Mock
Myzus persicae	4	1	5	0	Mock_Mock
Myzus persicae	4	1	3	4	Mock_Mock
Myzus persicae	4	1	2	3	Mock_Mock
Myzus persicae	4	1	5	9	Mock_Mock
Myzus persicae	5	1	12	2	Mock_Mock
Myzus persicae	5	1	14	0	Mock_Mock
Myzus persicae	5	1	2	9	Mock_Mock
Myzus persicae	5	1	5	9	Mock_Mock
Myzus persicae	5	1	2	5	Mock_Mock
Myzus persicae	1	24	6	7	Mock_Mock
Myzus persicae	1	24	5	8	Mock_Mock
Myzus persicae	1	24	3	7	Mock_Mock
Myzus persicae	1	24	6	7	Mock_Mock
Myzus persicae	1	24	7	6	Mock_Mock
Myzus persicae	2	24	12	2	Mock_Mock
Myzus persicae	2	24	5	8	Mock_Mock
Myzus persicae	2	24	7	7	Mock_Mock
Myzus persicae	2	24	5	9	Mock_Mock
Myzus persicae	2	24	9	6	Mock_Mock
Myzus persicae	3	24	7	5	Mock_Mock
Myzus persicae	3	24	6	6	Mock_Mock
Myzus persicae	3	24	6	2	Mock_Mock
Myzus persicae	3	24	11	6	Mock_Mock
Myzus persicae	3	24	5	4	Mock_Mock
Myzus persicae	4	24	9	3	Mock_Mock
Myzus persicae	4	24	4	2	Mock_Mock
Myzus persicae	4	24	5	2	Mock_Mock
Myzus persicae	4	24	9	8	Mock_Mock
Myzus persicae	4	24	5	4	Mock_Mock
Myzus persicae	5	24	7	5	Mock_Mock
Myzus persicae	5	24	4	10	Mock_Mock
Myzus persicae	5	24	6	4	Mock_Mock
Myzus persicae	5	24	5	4	Mock_Mock
Myzus persicae	5	24	6	3	Mock_Mock
Macrosiphum euphorbiae	1	1	7	11	Mock_F1F2(L2b)F3
Macrosiphum euphorbiae	1	1	10	5	Mock_F1F2(L2b)F3
Macrosiphum euphorbiae	1	1	12	5	Mock_F1F2(L2b)F3
Macrosiphum euphorbiae	1	1	16	2	Mock_F1F2(L2b)F3
Macrosiphum euphorbiae	1	1	4	12	Mock_F1F2(L2b)F3
Macrosiphum euphorbiae	2	1	11	6	Mock_F1F2(L2b)F3
Macrosiphum euphorbiae	2	1	9	9	Mock_F1F2(L2b)F3
Macrosiphum euphorbiae	2	1	8	8	Mock_F1F2(L2b)F3
Macrosiphum euphorbiae	2	1	7	6	Mock_F1F2(L2b)F3
Macrosiphum euphorbiae	2	1	9	5	Mock_F1F2(L2b)F3
Macrosiphum euphorbiae	2	1	15	3	Mock_F1F2(L2b)F3
Macrosiphum euphorbiae	2	1	6	6	Mock_F1F2(L2b)F3
Macrosiphum euphorbiae	2	1	4	8	Mock_F1F2(L2b)F3
Macrosiphum euphorbiae	3	1	8	2	Mock_F1F2(L2b)F3
Macrosiphum euphorbiae	3	1	8	2	Mock_F1F2(L2b)F3
Macrosiphum euphorbiae	3	1	6	10	Mock_F1F2(L2b)F3
Macrosiphum euphorbiae	3	1	11	4	Mock_F1F2(L2b)F3
Macrosiphum euphorbiae	3	1	8	5	Mock_F1F2(L2b)F3
Macrosiphum euphorbiae	3	1	9	6	Mock_F1F2(L2b)F3
Macrosiphum euphorbiae	3	1	1	9	Mock_F1F2(L2b)F3
Macrosiphum euphorbiae	3	1	5	6	Mock_F1F2(L2b)F3
Macrosiphum euphorbiae	4	1	12	3	Mock_F1F2(L2b)F3
Macrosiphum euphorbiae	4	1	5	10	Mock_F1F2(L2b)F3
Macrosiphum euphorbiae	4	1	0	0	Mock_F1F2(L2b)F3
Macrosiphum euphorbiae	4	1	8	7	Mock_F1F2(L2b)F3
Macrosiphum euphorbiae	4	1	8	6	Mock_F1F2(L2b)F3
Macrosiphum euphorbiae	4	1	8	10	Mock_F1F2(L2b)F3
Macrosiphum euphorbiae	4	1	5	10	Mock_F1F2(L2b)F3
Macrosiphum euphorbiae	4	1	4	9	Mock_F1F2(L2b)F3
Macrosiphum euphorbiae	4	1	9	6	Mock_F1F2(L2b)F3
Macrosiphum euphorbiae	4	1	10	6	Mock_F1F2(L2b)F3
Macrosiphum euphorbiae	5	1	4	8	Mock_F1F2(L2b)F3
Macrosiphum euphorbiae	5	1	8	7	Mock_F1F2(L2b)F3
Macrosiphum euphorbiae	5	1	10	2	Mock_F1F2(L2b)F3
Macrosiphum euphorbiae	5	1	9	3	Mock_F1F2(L2b)F3
Macrosiphum euphorbiae	5	1	14	2	Mock_F1F2(L2b)F3
Macrosiphum euphorbiae	5	1	3	8	Mock_F1F2(L2b)F3
Macrosiphum euphorbiae	5	1	8	4	Mock_F1F2(L2b)F3
Macrosiphum euphorbiae	5	1	15	4	Mock_F1F2(L2b)F3
Macrosiphum euphorbiae	5	1	2	10	Mock_F1F2(L2b)F3
Macrosiphum euphorbiae	5	1	6	7	Mock_F1F2(L2b)F3
Macrosiphum euphorbiae	1	24	6	6	Mock_F1F2(L2b)F3
Macrosiphum euphorbiae	1	24	15	2	Mock_F1F2(L2b)F3
Macrosiphum euphorbiae	1	24	13	6	Mock_F1F2(L2b)F3
Macrosiphum euphorbiae	1	24	12	5	Mock_F1F2(L2b)F3
Macrosiphum euphorbiae	1	24	9	6	Mock_F1F2(L2b)F3
Macrosiphum euphorbiae	2	24	8	8	Mock_F1F2(L2b)F3
Macrosiphum euphorbiae	2	24	8	5	Mock_F1F2(L2b)F3
Macrosiphum euphorbiae	2	24	6	5	Mock_F1F2(L2b)F3
Macrosiphum euphorbiae	2	24	11	2	Mock_F1F2(L2b)F3
Macrosiphum euphorbiae	2	24	13	3	Mock_F1F2(L2b)F3
Macrosiphum euphorbiae	2	24	12	2	Mock_F1F2(L2b)F3
Macrosiphum euphorbiae	2	24	8	5	Mock_F1F2(L2b)F3
Macrosiphum euphorbiae	2	24	7	5	Mock_F1F2(L2b)F3
Macrosiphum euphorbiae	3	24	12	1	Mock_F1F2(L2b)F3
Macrosiphum euphorbiae	3	24	10	6	Mock_F1F2(L2b)F3
Macrosiphum euphorbiae	3	24	6	11	Mock_F1F2(L2b)F3
Macrosiphum euphorbiae	3	24	14	4	Mock_F1F2(L2b)F3
Macrosiphum euphorbiae	3	24	9	6	Mock_F1F2(L2b)F3
Macrosiphum euphorbiae	3	24	11	7	Mock_F1F2(L2b)F3
Macrosiphum euphorbiae	3	24	4	9	Mock_F1F2(L2b)F3
Macrosiphum euphorbiae	3	24	8	6	Mock_F1F2(L2b)F3
Macrosiphum euphorbiae	4	24	4	4	Mock_F1F2(L2b)F3
Macrosiphum euphorbiae	4	24	5	9	Mock_F1F2(L2b)F3
Macrosiphum euphorbiae	4	24	0	0	Mock_F1F2(L2b)F3
Macrosiphum euphorbiae	4	24	7	6	Mock_F1F2(L2b)F3
Macrosiphum euphorbiae	4	24	6	4	Mock_F1F2(L2b)F3
Macrosiphum euphorbiae	4	24	5	6	Mock_F1F2(L2b)F3
Macrosiphum euphorbiae	4	24	6	8	Mock_F1F2(L2b)F3
Macrosiphum euphorbiae	4	24	6	4	Mock_F1F2(L2b)F3
Macrosiphum euphorbiae	4	24	10	6	Mock_F1F2(L2b)F3
Macrosiphum euphorbiae	4	24	5	3	Mock_F1F2(L2b)F3
Macrosiphum euphorbiae	5	24	9	7	Mock_F1F2(L2b)F3
Macrosiphum euphorbiae	5	24	7	6	Mock_F1F2(L2b)F3
Macrosiphum euphorbiae	5	24	11	7	Mock_F1F2(L2b)F3
Macrosiphum euphorbiae	5	24	4	2	Mock_F1F2(L2b)F3
Macrosiphum euphorbiae	5	24	12	0	Mock_F1F2(L2b)F3
Macrosiphum euphorbiae	5	24	8	5	Mock_F1F2(L2b)F3
Macrosiphum euphorbiae	5	24	9	2	Mock_F1F2(L2b)F3
Macrosiphum euphorbiae	5	24	6	6	Mock_F1F2(L2b)F3
Macrosiphum euphorbiae	5	24	8	3	Mock_F1F2(L2b)F3
Macrosiphum euphorbiae	5	24	4	8	Mock_F1F2(L2b)F3
Macrosiphum euphorbiae	1	1	17	3	Mock_CMV
Macrosiphum euphorbiae	1	1	7	4	Mock_CMV
Macrosiphum euphorbiae	1	1	7	5	Mock_CMV
Macrosiphum euphorbiae	1	1	17	1	Mock_CMV
Macrosiphum euphorbiae	2	1	14	4	Mock_CMV
Macrosiphum euphorbiae	2	1	10	4	Mock_CMV
Macrosiphum euphorbiae	2	1	12	3	Mock_CMV
Macrosiphum euphorbiae	2	1	11	6	Mock_CMV
Macrosiphum euphorbiae	2	1	11	3	Mock_CMV
Macrosiphum euphorbiae	3	1	7	4	Mock_CMV
Macrosiphum euphorbiae	3	1	8	7	Mock_CMV
Macrosiphum euphorbiae	3	1	9	2	Mock_CMV
Macrosiphum euphorbiae	3	1	10	1	Mock_CMV
Macrosiphum euphorbiae	3	1	5	7	Mock_CMV
Macrosiphum euphorbiae	4	1	10	2	Mock_CMV
Macrosiphum euphorbiae	4	1	4	1	Mock_CMV
Macrosiphum euphorbiae	4	1	11	5	Mock_CMV
Macrosiphum euphorbiae	4	1	16	1	Mock_CMV
Macrosiphum euphorbiae	4	1	12	5	Mock_CMV
Macrosiphum euphorbiae	4	1	13	1	Mock_CMV
Macrosiphum euphorbiae	5	1	11	8	Mock_CMV
Macrosiphum euphorbiae	5	1	12	3	Mock_CMV
Macrosiphum euphorbiae	5	1	5	6	Mock_CMV
Macrosiphum euphorbiae	5	1	14	3	Mock_CMV
Macrosiphum euphorbiae	5	1	15	2	Mock_CMV
Macrosiphum euphorbiae	1	24	12	2	Mock_CMV
Macrosiphum euphorbiae	1	24	14	2	Mock_CMV
Macrosiphum euphorbiae	1	24	7	4	Mock_CMV
Macrosiphum euphorbiae	1	24	16	2	Mock_CMV
Macrosiphum euphorbiae	2	24	16	0	Mock_CMV
Macrosiphum euphorbiae	2	24	8	3	Mock_CMV
Macrosiphum euphorbiae	2	24	14	1	Mock_CMV
Macrosiphum euphorbiae	2	24	15	4	Mock_CMV
Macrosiphum euphorbiae	2	24	12	2	Mock_CMV
Macrosiphum euphorbiae	3	24	8	4	Mock_CMV
Macrosiphum euphorbiae	3	24	9	3	Mock_CMV
Macrosiphum euphorbiae	3	24	10	5	Mock_CMV
Macrosiphum euphorbiae	3	24	15	1	Mock_CMV
Macrosiphum euphorbiae	3	24	10	3	Mock_CMV
Macrosiphum euphorbiae	4	24	11	0	Mock_CMV
Macrosiphum euphorbiae	4	24	7	1	Mock_CMV
Macrosiphum euphorbiae	4	24	6	2	Mock_CMV
Macrosiphum euphorbiae	4	24	9	2	Mock_CMV
Macrosiphum euphorbiae	4	24	7	4	Mock_CMV
Macrosiphum euphorbiae	4	24	8	2	Mock_CMV
Macrosiphum euphorbiae	5	24	6	8	Mock_CMV
Macrosiphum euphorbiae	5	24	11	3	Mock_CMV
Macrosiphum euphorbiae	5	24	8	4	Mock_CMV
Macrosiphum euphorbiae	5	24	11	4	Mock_CMV
Macrosiphum euphorbiae	5	24	14	1	Mock_CMV
Macrosiphum euphorbiae	1	1	10	0	Mock_Mock
Macrosiphum euphorbiae	1	1	4	9	Mock_Mock
Macrosiphum euphorbiae	1	1	4	11	Mock_Mock
Macrosiphum euphorbiae	1	1	14	3	Mock_Mock
Macrosiphum euphorbiae	2	1	15	2	Mock_Mock
Macrosiphum euphorbiae	2	1	3	13	Mock_Mock
Macrosiphum euphorbiae	2	1	3	10	Mock_Mock
Macrosiphum euphorbiae	2	1	7	4	Mock_Mock
Macrosiphum euphorbiae	3	1	8	9	Mock_Mock
Macrosiphum euphorbiae	3	1	14	2	Mock_Mock
Macrosiphum euphorbiae	3	1	9	8	Mock_Mock
Macrosiphum euphorbiae	3	1	3	10	Mock_Mock
Macrosiphum euphorbiae	3	1	10	3	Mock_Mock
Macrosiphum euphorbiae	3	1	6	9	Mock_Mock
Macrosiphum euphorbiae	4	1	0	9	Mock_Mock
Macrosiphum euphorbiae	4	1	7	2	Mock_Mock
Macrosiphum euphorbiae	4	1	7	8	Mock_Mock
Macrosiphum euphorbiae	4	1	3	10	Mock_Mock
Macrosiphum euphorbiae	4	1	7	6	Mock_Mock
Macrosiphum euphorbiae	4	1	10	4	Mock_Mock
Macrosiphum euphorbiae	5	1	6	10	Mock_Mock
Macrosiphum euphorbiae	5	1	12	4	Mock_Mock
Macrosiphum euphorbiae	5	1	8	8	Mock_Mock
Macrosiphum euphorbiae	5	1	6	5	Mock_Mock
Macrosiphum euphorbiae	5	1	9	5	Mock_Mock
Macrosiphum euphorbiae	1	24	9	7	Mock_Mock
Macrosiphum euphorbiae	1	24	6	6	Mock_Mock
Macrosiphum euphorbiae	1	24	4	8	Mock_Mock
Macrosiphum euphorbiae	1	24	7	8	Mock_Mock
Macrosiphum euphorbiae	2	24	9	7	Mock_Mock
Macrosiphum euphorbiae	2	24	6	6	Mock_Mock
Macrosiphum euphorbiae	2	24	4	8	Mock_Mock
Macrosiphum euphorbiae	2	24	7	8	Mock_Mock
Macrosiphum euphorbiae	3	24	11	6	Mock_Mock
Macrosiphum euphorbiae	3	24	13	3	Mock_Mock
Macrosiphum euphorbiae	3	24	7	9	Mock_Mock
Macrosiphum euphorbiae	3	24	4	9	Mock_Mock
Macrosiphum euphorbiae	3	24	8	7	Mock_Mock
Macrosiphum euphorbiae	3	24	5	3	Mock_Mock
Macrosiphum euphorbiae	4	24	3	9	Mock_Mock
Macrosiphum euphorbiae	4	24	3	8	Mock_Mock
Macrosiphum euphorbiae	4	24	4	1	Mock_Mock
Macrosiphum euphorbiae	4	24	4	6	Mock_Mock
Macrosiphum euphorbiae	4	24	7	8	Mock_Mock
Macrosiphum euphorbiae	4	24	5	9	Mock_Mock
Macrosiphum euphorbiae	5	24	6	7	Mock_Mock
Macrosiphum euphorbiae	5	24	4	6	Mock_Mock
Macrosiphum euphorbiae	5	24	8	6	Mock_Mock
Macrosiphum euphorbiae	5	24	5	6	Mock_Mock
Macrosiphum euphorbiae	5	24	4	5	Mock_Mock

## Sheet: Figure 7
vector	experiment	time	Treatment.pair	A	B	A_B
Myzus persicae	1	1	1	1	4	CMV_CMVΔ2b
Myzus persicae	1	1	2	9	2	CMV_CMVΔ2b
Myzus persicae	1	1	3	4	9	CMV_CMVΔ2b
Myzus persicae	1	1	4	1	10	CMV_CMVΔ2b
Myzus persicae	1	1	5	9	7	CMV_CMVΔ2b
Myzus persicae	1	1	6	3	5	CMV_CMVΔ2b
Myzus persicae	1	1	7	8	6	CMV_CMVΔ2b
Myzus persicae	1	1	8	7	11	CMV_CMVΔ2b
Myzus persicae	2	1	1	1	6	CMV_CMVΔ2b
Myzus persicae	2	1	2	4	5	CMV_CMVΔ2b
Myzus persicae	2	1	3	5	6	CMV_CMVΔ2b
Myzus persicae	2	1	4	4	10	CMV_CMVΔ2b
Myzus persicae	2	1	5	5	8	CMV_CMVΔ2b
Myzus persicae	2	1	6	2	12	CMV_CMVΔ2b
Myzus persicae	3	1	1	4	8	CMV_CMVΔ2b
Myzus persicae	3	1	2	0	2	CMV_CMVΔ2b
Myzus persicae	3	1	3	3	11	CMV_CMVΔ2b
Myzus persicae	3	1	4	4	5	CMV_CMVΔ2b
Myzus persicae	3	1	5	1	10	CMV_CMVΔ2b
Myzus persicae	3	1	6	2	11	CMV_CMVΔ2b
Myzus persicae	3	1	7	5	8	CMV_CMVΔ2b
Myzus persicae	3	1	8	3	8	CMV_CMVΔ2b
Myzus persicae	3	1	9	1	15	CMV_CMVΔ2b
Myzus persicae	3	1	10	1	14	CMV_CMVΔ2b
Myzus persicae	3	1	11	8	8	CMV_CMVΔ2b
Myzus persicae	3	1	12	8	5	CMV_CMVΔ2b
Myzus persicae	1	24	1	0	12	CMV_CMVΔ2b
Myzus persicae	1	24	2	3	12	CMV_CMVΔ2b
Myzus persicae	1	24	3	3	16	CMV_CMVΔ2b
Myzus persicae	1	24	4	4	11	CMV_CMVΔ2b
Myzus persicae	1	24	5	7	5	CMV_CMVΔ2b
Myzus persicae	1	24	6	1	12	CMV_CMVΔ2b
Myzus persicae	1	24	7	8	5	CMV_CMVΔ2b
Myzus persicae	1	24	8	7	6	CMV_CMVΔ2b
Myzus persicae	2	24	1	7	9	CMV_CMVΔ2b
Myzus persicae	2	24	2	4	7	CMV_CMVΔ2b
Myzus persicae	2	24	3	4	4	CMV_CMVΔ2b
Myzus persicae	2	24	4	8	5	CMV_CMVΔ2b
Myzus persicae	2	24	5	4	6	CMV_CMVΔ2b
Myzus persicae	2	24	6	1	8	CMV_CMVΔ2b
Myzus persicae	3	24	1	10	4	CMV_CMVΔ2b
Myzus persicae	3	24	2	4	4	CMV_CMVΔ2b
Myzus persicae	3	24	3	1	10	CMV_CMVΔ2b
Myzus persicae	3	24	4	7	6	CMV_CMVΔ2b
Myzus persicae	3	24	5	1	11	CMV_CMVΔ2b
Myzus persicae	3	24	6	4	12	CMV_CMVΔ2b
Myzus persicae	3	24	7	7	8	CMV_CMVΔ2b
Myzus persicae	3	24	8	0	15	CMV_CMVΔ2b
Myzus persicae	3	24	9	4	7	CMV_CMVΔ2b
Myzus persicae	3	24	10	6	12	CMV_CMVΔ2b
Myzus persicae	3	24	11	11	5	CMV_CMVΔ2b
Myzus persicae	3	24	12	10	7	CMV_CMVΔ2b
Myzus persicae	1	1	1	1	6	Mock_CMVΔ2b
Myzus persicae	1	1	2	8	1	Mock_CMVΔ2b
Myzus persicae	1	1	3	10	4	Mock_CMVΔ2b
Myzus persicae	1	1	4	4	6	Mock_CMVΔ2b
Myzus persicae	1	1	5	7	8	Mock_CMVΔ2b
Myzus persicae	2	1	1	2	6	Mock_CMVΔ2b
Myzus persicae	2	1	2	4	0	Mock_CMVΔ2b
Myzus persicae	2	1	3	3	1	Mock_CMVΔ2b
Myzus persicae	2	1	4	12	5	Mock_CMVΔ2b
Myzus persicae	2	1	5	5	2	Mock_CMVΔ2b
Myzus persicae	3	1	1	15	1	Mock_CMVΔ2b
Myzus persicae	3	1	2	10	2	Mock_CMVΔ2b
Myzus persicae	3	1	3	4	12	Mock_CMVΔ2b
Myzus persicae	3	1	4	9	1	Mock_CMVΔ2b
Myzus persicae	3	1	5	7	6	Mock_CMVΔ2b
Myzus persicae	3	1	6	14	4	Mock_CMVΔ2b
Myzus persicae	3	1	7	0	16	Mock_CMVΔ2b
Myzus persicae	3	1	8	5	10	Mock_CMVΔ2b
Myzus persicae	3	1	9	2	6	Mock_CMVΔ2b
Myzus persicae	3	1	10	5	9	Mock_CMVΔ2b
Myzus persicae	3	1	11	12	2	Mock_CMVΔ2b
Myzus persicae	1	24	1	4	9	Mock_CMVΔ2b
Myzus persicae	1	24	1	9	5	Mock_CMVΔ2b
Myzus persicae	1	24	1	12	6	Mock_CMVΔ2b
Myzus persicae	1	24	1	10	5	Mock_CMVΔ2b
Myzus persicae	1	24	1	6	9	Mock_CMVΔ2b
Myzus persicae	2	24	1	4	10	Mock_CMVΔ2b
Myzus persicae	2	24	2	7	2	Mock_CMVΔ2b
Myzus persicae	2	24	3	2	2	Mock_CMVΔ2b
Myzus persicae	2	24	4	6	1	Mock_CMVΔ2b
Myzus persicae	2	24	5	9	2	Mock_CMVΔ2b
Myzus persicae	3	24	1	11	4	Mock_CMVΔ2b
Myzus persicae	3	24	2	3	3	Mock_CMVΔ2b
Myzus persicae	3	24	3	4	8	Mock_CMVΔ2b
Myzus persicae	3	24	4	9	3	Mock_CMVΔ2b
Myzus persicae	3	24	5	7	7	Mock_CMVΔ2b
Myzus persicae	3	24	6	5	6	Mock_CMVΔ2b
Myzus persicae	3	24	7	2	11	Mock_CMVΔ2b
Myzus persicae	3	24	8	7	4	Mock_CMVΔ2b
Myzus persicae	3	24	9	4	7	Mock_CMVΔ2b
Myzus persicae	3	24	10	5	3	Mock_CMVΔ2b
Myzus persicae	3	24	11	6	3	Mock_CMVΔ2b
Myzus persicae	1	1	1	8	5	Mock_CMV
Myzus persicae	1	1	2	13	1	Mock_CMV
Myzus persicae	1	1	3	6	7	Mock_CMV
Myzus persicae	1	1	4	6	2	Mock_CMV
Myzus persicae	1	1	5	5	5	Mock_CMV
Myzus persicae	1	1	6	2	12	Mock_CMV
Myzus persicae	1	1	7	9	8	Mock_CMV
Myzus persicae	2	1	1	13	5	Mock_CMV
Myzus persicae	2	1	2	1	18	Mock_CMV
Myzus persicae	2	1	3	2	12	Mock_CMV
Myzus persicae	2	1	4	8	2	Mock_CMV
Myzus persicae	2	1	5	9	2	Mock_CMV
Myzus persicae	3	1	1	9	1	Mock_CMV
Myzus persicae	3	1	2	6	1	Mock_CMV
Myzus persicae	3	1	3	5	7	Mock_CMV
Myzus persicae	3	1	4	13	0	Mock_CMV
Myzus persicae	3	1	5	15	2	Mock_CMV
Myzus persicae	3	1	6	1	9	Mock_CMV
Myzus persicae	3	1	7	7	4	Mock_CMV
Myzus persicae	3	1	8	0	9	Mock_CMV
Myzus persicae	1	24	1	1	5	Mock_CMV
Myzus persicae	1	24	2	11	0	Mock_CMV
Myzus persicae	1	24	3	7	2	Mock_CMV
Myzus persicae	1	24	4	7	3	Mock_CMV
Myzus persicae	1	24	5	11	2	Mock_CMV
Myzus persicae	1	24	6	8	5	Mock_CMV
Myzus persicae	1	24	7	8	7	Mock_CMV
Myzus persicae	2	24	1	17	6	Mock_CMV
Myzus persicae	2	24	2	10	2	Mock_CMV
Myzus persicae	2	24	3	20	9	Mock_CMV
Myzus persicae	2	24	4	5	2	Mock_CMV
Myzus persicae	2	24	5	7	3	Mock_CMV
Myzus persicae	3	24	1	9	2	Mock_CMV
Myzus persicae	3	24	2	7	4	Mock_CMV
Myzus persicae	3	24	3	11	0	Mock_CMV
Myzus persicae	3	24	4	7	3	Mock_CMV
Myzus persicae	3	24	5	14	2	Mock_CMV
Myzus persicae	3	24	6	7	2	Mock_CMV
Myzus persicae	3	24	7	14	1	Mock_CMV
Myzus persicae	3	24	8	3	6	Mock_CMV
Myzus persicae	1	1	1	5	3	Mock_Mock
Myzus persicae	1	1	2	5	4	Mock_Mock
Myzus persicae	1	1	3	3	7	Mock_Mock
Myzus persicae	1	1	4	7	3	Mock_Mock
Myzus persicae	1	1	5	9	4	Mock_Mock
Myzus persicae	1	1	6	1	14	Mock_Mock
Myzus persicae	1	1	7	4	10	Mock_Mock
Myzus persicae	1	1	8	4	0	Mock_Mock
Myzus persicae	2	1	1	4	4	Mock_Mock
Myzus persicae	2	1	2	2	14	Mock_Mock
Myzus persicae	2	1	3	17	1	Mock_Mock
Myzus persicae	2	1	4	3	17	Mock_Mock
Myzus persicae	2	1	5	8	6	Mock_Mock
Myzus persicae	3	1	1	2	15	Mock_Mock
Myzus persicae	3	1	2	2	14	Mock_Mock
Myzus persicae	3	1	3	8	4	Mock_Mock
Myzus persicae	3	1	4	13	3	Mock_Mock
Myzus persicae	3	1	5	2	7	Mock_Mock
Myzus persicae	3	1	6	13	1	Mock_Mock
Myzus persicae	3	1	7	15	3	Mock_Mock
Myzus persicae	1	24	1	8	4	Mock_Mock
Myzus persicae	1	24	2	5	6	Mock_Mock
Myzus persicae	1	24	3	4	10	Mock_Mock
Myzus persicae	1	24	4	9	3	Mock_Mock
Myzus persicae	1	24	5	7	4	Mock_Mock
Myzus persicae	1	24	6	1	7	Mock_Mock
Myzus persicae	1	24	7	5	5	Mock_Mock
Myzus persicae	1	24	8	5	7	Mock_Mock
Myzus persicae	2	24	1	6	9	Mock_Mock
Myzus persicae	2	24	2	12	7	Mock_Mock
Myzus persicae	2	24	3	17	14	Mock_Mock
Myzus persicae	2	24	4	7	11	Mock_Mock
Myzus persicae	2	24	5	11	15	Mock_Mock
Myzus persicae	3	24	1	6	8	Mock_Mock
Myzus persicae	3	24	2	12	4	Mock_Mock
Myzus persicae	3	24	3	9	6	Mock_Mock
Myzus persicae	3	24	4	9	4	Mock_Mock
Myzus persicae	3	24	5	1	9	Mock_Mock
Myzus persicae	3	24	6	9	1	Mock_Mock
Myzus persicae	3	24	7	7	11	Mock_Mock

## Sheet: Figure S5
vector	experiment	time	A	B	A_B
Myzus persicae	1	1	5	4	NT.CMV_T.CMV
Myzus persicae	1	1	4	8	NT.CMV_T.CMV
Myzus persicae	1	1	2	6	NT.CMV_T.CMV
Myzus persicae	1	1	1	4	NT.CMV_T.CMV
Myzus persicae	2	1	0	14	NT.CMV_T.CMV
Myzus persicae	2	1	1	8	NT.CMV_T.CMV
Myzus persicae	2	1	4	1	NT.CMV_T.CMV
Myzus persicae	2	1	4	3	NT.CMV_T.CMV
Myzus persicae	3	1	2	5	NT.CMV_T.CMV
Myzus persicae	3	1	6	2	NT.CMV_T.CMV
Myzus persicae	3	1	6	1	NT.CMV_T.CMV
Myzus persicae	3	1	4	3	NT.CMV_T.CMV
Myzus persicae	4	1	2	5	NT.CMV_T.CMV
Myzus persicae	4	1	6	7	NT.CMV_T.CMV
Myzus persicae	4	1	2	5	NT.CMV_T.CMV
Myzus persicae	4	1	4	5	NT.CMV_T.CMV
Myzus persicae	1	24	2	10	NT.CMV_T.CMV
Myzus persicae	1	24	1	9	NT.CMV_T.CMV
Myzus persicae	1	24	6	8	NT.CMV_T.CMV
Myzus persicae	1	24	5	3	NT.CMV_T.CMV
Myzus persicae	2	24	3	16	NT.CMV_T.CMV
Myzus persicae	2	24	1	12	NT.CMV_T.CMV
Myzus persicae	2	24	4	6	NT.CMV_T.CMV
Myzus persicae	2	24	9	1	NT.CMV_T.CMV
Myzus persicae	3	24	8	6	NT.CMV_T.CMV
Myzus persicae	3	24	1	1	NT.CMV_T.CMV
Myzus persicae	3	24	4	9	NT.CMV_T.CMV
Myzus persicae	3	24	3	12	NT.CMV_T.CMV
Myzus persicae	4	24	1	5	NT.CMV_T.CMV
Myzus persicae	4	24	2	6	NT.CMV_T.CMV
Myzus persicae	4	24	2	4	NT.CMV_T.CMV
Myzus persicae	4	24	2	4	NT.CMV_T.CMV
Myzus persicae	1	1	0	4	NT.Mock_T.Mock
Myzus persicae	1	1	12	0	NT.Mock_T.Mock
Myzus persicae	1	1	3	6	NT.Mock_T.Mock
Myzus persicae	1	1	0	3	NT.Mock_T.Mock
Myzus persicae	2	1	4	5	NT.Mock_T.Mock
Myzus persicae	2	1	9	1	NT.Mock_T.Mock
Myzus persicae	2	1	9	0	NT.Mock_T.Mock
Myzus persicae	2	1	3	2	NT.Mock_T.Mock
Myzus persicae	3	1	2	4	NT.Mock_T.Mock
Myzus persicae	3	1	0	2	NT.Mock_T.Mock
Myzus persicae	3	1	10	2	NT.Mock_T.Mock
Myzus persicae	3	1	4	7	NT.Mock_T.Mock
Myzus persicae	4	1	7	0	NT.Mock_T.Mock
Myzus persicae	4	1	2	2	NT.Mock_T.Mock
Myzus persicae	4	1	9	1	NT.Mock_T.Mock
Myzus persicae	4	1	4	10	NT.Mock_T.Mock
Myzus persicae	4	1	0	5	NT.Mock_T.Mock
Myzus persicae	1	24	9	10	NT.Mock_T.Mock
Myzus persicae	1	24	12	5	NT.Mock_T.Mock
Myzus persicae	1	24	3	11	NT.Mock_T.Mock
Myzus persicae	1	24	5	6	NT.Mock_T.Mock
Myzus persicae	2	24	4	4	NT.Mock_T.Mock
Myzus persicae	2	24	5	14	NT.Mock_T.Mock
Myzus persicae	2	24	11	1	NT.Mock_T.Mock
Myzus persicae	2	24	6	7	NT.Mock_T.Mock
Myzus persicae	3	24	3	3	NT.Mock_T.Mock
Myzus persicae	3	24	5	6	NT.Mock_T.Mock
Myzus persicae	3	24	5	7	NT.Mock_T.Mock
Myzus persicae	3	24	10	4	NT.Mock_T.Mock
Myzus persicae	4	24	7	3	NT.Mock_T.Mock
Myzus persicae	4	24	4	8	NT.Mock_T.Mock
Myzus persicae	4	24	7	5	NT.Mock_T.Mock
Myzus persicae	4	24	5	5	NT.Mock_T.Mock
Myzus persicae	4	24	9	9	NT.Mock_T.Mock
Macrosiphum euphorbiae	1	1	4	7	NT.CMV_T.CMV
Macrosiphum euphorbiae	1	1	10	3	NT.CMV_T.CMV
Macrosiphum euphorbiae	1	1	5	9	NT.CMV_T.CMV
Macrosiphum euphorbiae	1	1	8	8	NT.CMV_T.CMV
Macrosiphum euphorbiae	2	1	9	2	NT.CMV_T.CMV
Macrosiphum euphorbiae	2	1	10	4	NT.CMV_T.CMV
Macrosiphum euphorbiae	2	1	7	5	NT.CMV_T.CMV
Macrosiphum euphorbiae	2	1	4	6	NT.CMV_T.CMV
Macrosiphum euphorbiae	3	1	5	9	NT.CMV_T.CMV
Macrosiphum euphorbiae	3	1	9	5	NT.CMV_T.CMV
Macrosiphum euphorbiae	3	1	7	2	NT.CMV_T.CMV
Macrosiphum euphorbiae	3	1	10	2	NT.CMV_T.CMV
Macrosiphum euphorbiae	1	24	5	11	NT.CMV_T.CMV
Macrosiphum euphorbiae	1	24	9	2	NT.CMV_T.CMV
Macrosiphum euphorbiae	1	24	10	7	NT.CMV_T.CMV
Macrosiphum euphorbiae	1	24	6	10	NT.CMV_T.CMV
Macrosiphum euphorbiae	2	24	8	4	NT.CMV_T.CMV
Macrosiphum euphorbiae	2	24	8	5	NT.CMV_T.CMV
Macrosiphum euphorbiae	2	24	10	4	NT.CMV_T.CMV
Macrosiphum euphorbiae	2	24	5	6	NT.CMV_T.CMV
Macrosiphum euphorbiae	3	24	7	9	NT.CMV_T.CMV
Macrosiphum euphorbiae	3	24	6	10	NT.CMV_T.CMV
Macrosiphum euphorbiae	3	24	7	5	NT.CMV_T.CMV
Macrosiphum euphorbiae	3	24	10	2	NT.CMV_T.CMV
Macrosiphum euphorbiae	1	1	9	9	NT.Mock_T.Mock
Macrosiphum euphorbiae	1	1	11	3	NT.Mock_T.Mock
Macrosiphum euphorbiae	1	1	11	5	NT.Mock_T.Mock
Macrosiphum euphorbiae	1	1	8	12	NT.Mock_T.Mock
Macrosiphum euphorbiae	2	1	6	4	NT.Mock_T.Mock
Macrosiphum euphorbiae	2	1	6	7	NT.Mock_T.Mock
Macrosiphum euphorbiae	2	1	6	10	NT.Mock_T.Mock
Macrosiphum euphorbiae	2	1	7	5	NT.Mock_T.Mock
Macrosiphum euphorbiae	3	1	7	9	NT.Mock_T.Mock
Macrosiphum euphorbiae	3	1	8	3	NT.Mock_T.Mock
Macrosiphum euphorbiae	3	1	9	9	NT.Mock_T.Mock
Macrosiphum euphorbiae	3	1	4	7	NT.Mock_T.Mock
Macrosiphum euphorbiae	1	24	9	8	NT.Mock_T.Mock
Macrosiphum euphorbiae	1	24	6	4	NT.Mock_T.Mock
Macrosiphum euphorbiae	1	24	14	8	NT.Mock_T.Mock
Macrosiphum euphorbiae	1	24	4	15	NT.Mock_T.Mock
Macrosiphum euphorbiae	2	24	5	6	NT.Mock_T.Mock
Macrosiphum euphorbiae	2	24	8	6	NT.Mock_T.Mock
Macrosiphum euphorbiae	2	24	5	9	NT.Mock_T.Mock
Macrosiphum euphorbiae	2	24	7	6	NT.Mock_T.Mock
Macrosiphum euphorbiae	3	24	5	10	NT.Mock_T.Mock
Macrosiphum euphorbiae	3	24	9	6	NT.Mock_T.Mock
Macrosiphum euphorbiae	3	24	6	9	NT.Mock_T.Mock
Macrosiphum euphorbiae	3	24	6	4	NT.Mock_T.Mock
Myzus persicae	1	1	1	2	T.Mock_NT.CMV
Myzus persicae	1	1	16	0	T.Mock_NT.CMV
Myzus persicae	1	1	0	5	T.Mock_NT.CMV
Myzus persicae	1	1	9	0	T.Mock_NT.CMV
Myzus persicae	1	1	2	3	T.Mock_NT.CMV
Myzus persicae	2	1	13	0	T.Mock_NT.CMV
Myzus persicae	2	1	3	4	T.Mock_NT.CMV
Myzus persicae	2	1	10	0	T.Mock_NT.CMV
Myzus persicae	2	1	2	0	T.Mock_NT.CMV
Myzus persicae	3	1	5	4	T.Mock_NT.CMV
Myzus persicae	3	1	10	3	T.Mock_NT.CMV
Myzus persicae	3	1	11	1	T.Mock_NT.CMV
Myzus persicae	3	1	14	0	T.Mock_NT.CMV
Myzus persicae	1	1	0	10	T.CMV_NT.Mock
Myzus persicae	1	1	4	10	T.CMV_NT.Mock
Myzus persicae	1	1	10	1	T.CMV_NT.Mock
Myzus persicae	1	1	2	9	T.CMV_NT.Mock
Myzus persicae	1	1	0	13	T.CMV_NT.Mock
Myzus persicae	2	1	3	12	T.CMV_NT.Mock
Myzus persicae	2	1	0	9	T.CMV_NT.Mock
Myzus persicae	2	1	0	14	T.CMV_NT.Mock
Myzus persicae	2	1	3	11	T.CMV_NT.Mock
Myzus persicae	3	1	3	9	T.CMV_NT.Mock
Myzus persicae	3	1	4	6	T.CMV_NT.Mock
Myzus persicae	3	1	2	9	T.CMV_NT.Mock
Myzus persicae	3	1	0	12	T.CMV_NT.Mock
Myzus persicae	1	24	11	2	T.Mock_NT.CMV
Myzus persicae	1	24	14	2	T.Mock_NT.CMV
Myzus persicae	1	24	2	4	T.Mock_NT.CMV
Myzus persicae	1	24	15	1	T.Mock_NT.CMV
Myzus persicae	1	24	10	1	T.Mock_NT.CMV
Myzus persicae	2	24	8	0	T.Mock_NT.CMV
Myzus persicae	2	24	8	2	T.Mock_NT.CMV
Myzus persicae	2	24	14	1	T.Mock_NT.CMV
Myzus persicae	2	24	10	0	T.Mock_NT.CMV
Myzus persicae	3	24	9	2	T.Mock_NT.CMV
Myzus persicae	3	24	8	3	T.Mock_NT.CMV
Myzus persicae	3	24	7	1	T.Mock_NT.CMV
Myzus persicae	3	24	12	1	T.Mock_NT.CMV
Myzus persicae	1	24	3	7	T.CMV_NT.Mock
Myzus persicae	1	24	3	12	T.CMV_NT.Mock
Myzus persicae	1	24	10	3	T.CMV_NT.Mock
Myzus persicae	1	24	1	4	T.CMV_NT.Mock
Myzus persicae	1	24	2	12	T.CMV_NT.Mock
Myzus persicae	2	24	4	13	T.CMV_NT.Mock
Myzus persicae	2	24	0	8	T.CMV_NT.Mock
Myzus persicae	2	24	3	12	T.CMV_NT.Mock
Myzus persicae	2	24	2	11	T.CMV_NT.Mock
Myzus persicae	3	24	4	6	T.CMV_NT.Mock
Myzus persicae	3	24	4	5	T.CMV_NT.Mock
Myzus persicae	3	24	3	8	T.CMV_NT.Mock
Myzus persicae	3	24	5	13	T.CMV_NT.Mock
Myzus persicae	1	1	4	4	T.Mock_T.Mock
Myzus persicae	1	1	13	0	T.Mock_T.Mock
Myzus persicae	1	1	4	3	T.Mock_T.Mock
Myzus persicae	1	1	3	6	T.Mock_T.Mock
Myzus persicae	2	1	6	5	T.Mock_T.Mock
Myzus persicae	2	1	3	0	T.Mock_T.Mock
Myzus persicae	2	1	2	9	T.Mock_T.Mock
Myzus persicae	2	1	5	4	T.Mock_T.Mock
Myzus persicae	3	1	0	11	T.Mock_T.Mock
Myzus persicae	3	1	4	2	T.Mock_T.Mock
Myzus persicae	3	1	5	2	T.Mock_T.Mock
Myzus persicae	3	1	6	6	T.Mock_T.Mock
Myzus persicae	3	1	7	6	T.Mock_T.Mock
Myzus persicae	1	24	6	7	T.Mock_T.Mock
Myzus persicae	1	24	9	3	T.Mock_T.Mock
Myzus persicae	1	24	3	10	T.Mock_T.Mock
Myzus persicae	1	24	5	4	T.Mock_T.Mock
Myzus persicae	2	24	10	8	T.Mock_T.Mock
Myzus persicae	2	24	5	5	T.Mock_T.Mock
Myzus persicae	2	24	2	12	T.Mock_T.Mock
Myzus persicae	2	24	4	4	T.Mock_T.Mock
Myzus persicae	3	24	9	2	T.Mock_T.Mock
Myzus persicae	3	24	3	7	T.Mock_T.Mock
Myzus persicae	3	24	4	7	T.Mock_T.Mock
Myzus persicae	3	24	6	2	T.Mock_T.Mock
Myzus persicae	3	24	7	6	T.Mock_T.Mock
Macrosiphum euphorbiae	1	1	5	7	T.Mock_NT.CMV
Macrosiphum euphorbiae	1	1	8	9	T.Mock_NT.CMV
Macrosiphum euphorbiae	1	1	10	0	T.Mock_NT.CMV
Macrosiphum euphorbiae	1	1	8	7	T.Mock_NT.CMV
Macrosiphum euphorbiae	2	1	10	3	T.Mock_NT.CMV
Macrosiphum euphorbiae	2	1	7	2	T.Mock_NT.CMV
Macrosiphum euphorbiae	2	1	5	2	T.Mock_NT.CMV
Macrosiphum euphorbiae	2	1	6	3	T.Mock_NT.CMV
Macrosiphum euphorbiae	3	1	12	1	T.Mock_NT.CMV
Macrosiphum euphorbiae	3	1	11	2	T.Mock_NT.CMV
Macrosiphum euphorbiae	3	1	9	1	T.Mock_NT.CMV
Macrosiphum euphorbiae	3	1	12	8	T.Mock_NT.CMV
Macrosiphum euphorbiae	1	1	3	12	T.CMV_NT.Mock
Macrosiphum euphorbiae	1	1	0	9	T.CMV_NT.Mock
Macrosiphum euphorbiae	1	1	0	14	T.CMV_NT.Mock
Macrosiphum euphorbiae	1	1	3	11	T.CMV_NT.Mock
Macrosiphum euphorbiae	1	1	0	12	T.CMV_NT.Mock
Macrosiphum euphorbiae	2	1	5	10	T.CMV_NT.Mock
Macrosiphum euphorbiae	2	1	2	9	T.CMV_NT.Mock
Macrosiphum euphorbiae	2	1	4	10	T.CMV_NT.Mock
Macrosiphum euphorbiae	2	1	2	9	T.CMV_NT.Mock
Macrosiphum euphorbiae	3	1	7	7	T.CMV_NT.Mock
Macrosiphum euphorbiae	3	1	1	12	T.CMV_NT.Mock
Macrosiphum euphorbiae	3	1	5	9	T.CMV_NT.Mock
Macrosiphum euphorbiae	3	1	3	12	T.CMV_NT.Mock
Macrosiphum euphorbiae	1	24	12	3	T.Mock_NT.CMV
Macrosiphum euphorbiae	1	24	6	6	T.Mock_NT.CMV
Macrosiphum euphorbiae	1	24	8	5	T.Mock_NT.CMV
Macrosiphum euphorbiae	1	24	11	2	T.Mock_NT.CMV
Macrosiphum euphorbiae	2	24	8	2	T.Mock_NT.CMV
Macrosiphum euphorbiae	2	24	9	3	T.Mock_NT.CMV
Macrosiphum euphorbiae	2	24	4	2	T.Mock_NT.CMV
Macrosiphum euphorbiae	2	24	9	6	T.Mock_NT.CMV
Macrosiphum euphorbiae	3	24	14	3	T.Mock_NT.CMV
Macrosiphum euphorbiae	3	24	11	2	T.Mock_NT.CMV
Macrosiphum euphorbiae	3	24	13	4	T.Mock_NT.CMV
Macrosiphum euphorbiae	3	24	10	0	T.Mock_NT.CMV
Macrosiphum euphorbiae	1	24	4	13	T.CMV_NT.Mock
Macrosiphum euphorbiae	1	24	0	8	T.CMV_NT.Mock
Macrosiphum euphorbiae	1	24	3	12	T.CMV_NT.Mock
Macrosiphum euphorbiae	1	24	2	11	T.CMV_NT.Mock
Macrosiphum euphorbiae	1	24	5	13	T.CMV_NT.Mock
Macrosiphum euphorbiae	2	24	6	13	T.CMV_NT.Mock
Macrosiphum euphorbiae	2	24	3	8	T.CMV_NT.Mock
Macrosiphum euphorbiae	2	24	2	11	T.CMV_NT.Mock
Macrosiphum euphorbiae	2	24	5	8	T.CMV_NT.Mock
Macrosiphum euphorbiae	3	24	6	10	T.CMV_NT.Mock
Macrosiphum euphorbiae	3	24	0	13	T.CMV_NT.Mock
Macrosiphum euphorbiae	3	24	4	11	T.CMV_NT.Mock
Macrosiphum euphorbiae	3	24	3	10	T.CMV_NT.Mock
Macrosiphum euphorbiae	1	1	5	7	T.Mock_T.Mock
Macrosiphum euphorbiae	1	1	6	6	T.Mock_T.Mock
Macrosiphum euphorbiae	1	1	1	8	T.Mock_T.Mock
Macrosiphum euphorbiae	1	1	7	6	T.Mock_T.Mock
Macrosiphum euphorbiae	2	1	4	4	T.Mock_T.Mock
Macrosiphum euphorbiae	2	1	13	0	T.Mock_T.Mock
Macrosiphum euphorbiae	2	1	4	3	T.Mock_T.Mock
Macrosiphum euphorbiae	2	1	3	6	T.Mock_T.Mock
Macrosiphum euphorbiae	3	1	6	6	T.Mock_T.Mock
Macrosiphum euphorbiae	3	1	6	6	T.Mock_T.Mock
Macrosiphum euphorbiae	3	1	4	8	T.Mock_T.Mock
Macrosiphum euphorbiae	3	1	8	1	T.Mock_T.Mock
Macrosiphum euphorbiae	3	1	9	7	T.Mock_T.Mock
Macrosiphum euphorbiae	1	24	7	10	T.Mock_T.Mock
Macrosiphum euphorbiae	1	24	6	2	T.Mock_T.Mock
Macrosiphum euphorbiae	1	24	3	7	T.Mock_T.Mock
Macrosiphum euphorbiae	1	24	7	6	T.Mock_T.Mock
Macrosiphum euphorbiae	2	24	6	7	T.Mock_T.Mock
Macrosiphum euphorbiae	2	24	9	3	T.Mock_T.Mock
Macrosiphum euphorbiae	2	24	3	10	T.Mock_T.Mock
Macrosiphum euphorbiae	2	24	5	4	T.Mock_T.Mock
Macrosiphum euphorbiae	3	24	7	5	T.Mock_T.Mock
Macrosiphum euphorbiae	3	24	10	5	T.Mock_T.Mock
Macrosiphum euphorbiae	3	24	5	9	T.Mock_T.Mock
Macrosiphum euphorbiae	3	24	7	8	T.Mock_T.Mock
Macrosiphum euphorbiae	3	24	8	7	T.Mock_T.Mock
